# Supplementary material for: Healthcare resource utilisation and costs of hospitalisation and primary care among adults with COVID-19 in England: a population-based cohort study
Source: PubMed Central journal article supplement — BMJ Open. 2023 Dec 28;13(12):e075495. doi: 10.1136/bmjopen-2023-075495 (PMC10759085; doi:10.1136/bmjopen-2023-075495), 2023-12-28
Supplement: bmjopen-2023-075495.draft_revisions.pdf [file bmjopen-2023-075495.draft_revisions.pdf]

# BMJ Open

BMJ Open is committed to open peer review. As part of this commitment we make the peer review history of every article we publish publicly available.

When an article is published we post the peer reviewers' comments and the authors' responses online. We also post the versions of the paper that were used during peer review. These are the versions that the peer review comments apply to.

The versions of the paper that follow are the versions that were submitted during the peer review process. They are not the versions of record or the final published versions. They should not be cited or distributed as the published version of this manuscript.

BMJ Open is an open access journal and the full, final, typeset and author-corrected version of record of the manuscript is available on our site with no access controls, subscription charges or pay-per-view fees (<http://bmjopen.bmj.com>).

If you have any questions on BMJ Open's open peer review process please email [info.bmjopen@bmj.com](mailto:info.bmjopen@bmj.com)

# BMJ Open

## Healthcare resource utilisation and costs of hospitalisation and primary care among adults with COVID-19 in England: a population-based cohort study

|                               |                                                                                                                                                                                                                                                                                                                                                                                                                                                                                                                                                                         |
|-------------------------------|-------------------------------------------------------------------------------------------------------------------------------------------------------------------------------------------------------------------------------------------------------------------------------------------------------------------------------------------------------------------------------------------------------------------------------------------------------------------------------------------------------------------------------------------------------------------------|
| Journal:                      | <i>BMJ Open</i>                                                                                                                                                                                                                                                                                                                                                                                                                                                                                                                                                         |
| Manuscript ID                 | bmjopen-2023-075495                                                                                                                                                                                                                                                                                                                                                                                                                                                                                                                                                     |
| Article Type:                 | Original research                                                                                                                                                                                                                                                                                                                                                                                                                                                                                                                                                       |
| Date Submitted by the Author: | 10-May-2023                                                                                                                                                                                                                                                                                                                                                                                                                                                                                                                                                             |
| Complete List of Authors:     | Yang, Jingyan; Pfizer Inc; Columbia University<br>Andersen, Kathleen; Pfizer Inc,<br>Rai, Kiran; Adelphi Real World<br>Tritton, Theo; Adelphi Real World<br>Mugwagwa, Tendai; Pfizer Inc<br>Reimbaeva, Maya; Pfizer Inc<br>Tsang, Carmen; Pfizer Ltd<br>McGrath, Leah; Pfizer Inc<br>Payne, Poppy; Adelphi Real World<br>Backhouse, Bethany; Adelphi Real World,<br>Mendes, Diana; Pfizer Ltd, Health & Value<br>Butfield, Rebecca; Pfizer Ltd<br>Naicker, Kevin; Pfizer Ltd<br>Araghi, Mary; Pfizer Ltd<br>Wood, R; Adelphi Real World<br>Nguyen, Jennifer; Pfizer Inc |
| Keywords:                     | COVID-19, Primary Health Care, SARS-CoV-2, Retrospective Studies, Hospitalization                                                                                                                                                                                                                                                                                                                                                                                                                                                                                       |
|                               |                                                                                                                                                                                                                                                                                                                                                                                                                                                                                                                                                                         |

SCHOLARONE™  
Manuscripts

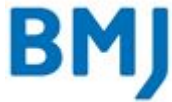

I, the Submitting Author has the right to grant and does grant on behalf of all authors of the Work (as defined in the below author licence), an exclusive licence and/or a non-exclusive licence for contributions from authors who are: i) UK Crown employees; ii) where BMJ has agreed a CC-BY licence shall apply, and/or iii) in accordance with the terms applicable for US Federal Government officers or employees acting as part of their official duties; on a worldwide, perpetual, irrevocable, royalty-free basis to BMJ Publishing Group Ltd ("BMJ") its licensees and where the relevant Journal is co-owned by BMJ to the co-owners of the Journal, to publish the Work in this journal and any other BMJ products and to exploit all rights, as set out in our [licence](#).

The Submitting Author accepts and understands that any supply made under these terms is made by BMJ to the Submitting Author unless you are acting as an employee on behalf of your employer or a postgraduate student of an affiliated institution which is paying any applicable article publishing charge ("APC") for Open Access articles. Where the Submitting Author wishes to make the Work available on an Open Access basis (and intends to pay the relevant APC), the terms of reuse of such Open Access shall be governed by a Creative Commons licence – details of these licences and which [Creative Commons](#) licence will apply to this Work are set out in our licence referred to above.

Other than as permitted in any relevant BMJ Author's Self Archiving Policies, I confirm this Work has not been accepted for publication elsewhere, is not being considered for publication elsewhere and does not duplicate material already published. I confirm all authors consent to publication of this Work and authorise the granting of this licence.

1  
2  
3 **Healthcare resource utilisation and costs of hospitalisation and primary care**  
4 **among adults with COVID-19 in England: a population-based cohort study**  
5  
6  
7

8 Authors: Jingyan Yang<sup>1,2</sup>, Kathleen M. Andersen<sup>1</sup>, Kiran K. Rai<sup>3</sup>, Theo Tritton<sup>3</sup>, Tendai Mugwagwa<sup>4</sup>,  
9 Maya Reimbaeva<sup>1</sup>, Carmen Tsang<sup>4</sup>, Leah J. McGrath<sup>1</sup>, Poppy Payne<sup>3</sup>, Bethany Backhouse<sup>3</sup>, Diana  
10 Mendes<sup>4</sup>, Rebecca Butfield<sup>4</sup>, Kevin Naicker<sup>4</sup>, Mary Araghi<sup>4</sup>, Robert Wood<sup>3</sup>, Jennifer L. Nguyen<sup>1</sup>  
11  
12  
13

14 **Affiliations:**

15  
16  
17 <sup>1</sup> Pfizer Inc., New York, United States.

18 <sup>2</sup> Institute for Social and Economic Research and Policy, Columbia University, New York, NY, USA

19 <sup>3</sup> Adelphi Real World, Bollington, United Kingdom.

20 <sup>4</sup> Pfizer Ltd, Tadworth, United Kingdom.  
21  
22  
23

24  
25 **Corresponding Author:**

26  
27  
28 Jingyan Yang, DrPH MHS

29  
30 Global Value and Access,  
31 Pfizer Inc.  
32 66 Hudson Blvd E  
33 New York, NY 10001  
34 USA  
35  
36  
37

38 **Running Title:**

39  
40  
41 HCRU and Costs of COVID-19 in England  
42  
43

44 **Target Journal:**

45  
46  
47 BMJ  
48

49 **Word count:** 4031  
50  
51

52 **Figures / Tables:**  
53  
54  
55  
56  
57  
58  
59  
60

## ABSTRACT

**Objectives** To quantify healthcare resource utilisation (HCRU) and costs to the National Health Service (NHS) associated with acute COVID-19 in adults in England.

**Design** Population-based retrospective cohort study, using Clinical Practice Research Datalink (CPRD) Aurum primary care electronic medical records linked when available to Hospital Episode Statistics (HES) secondary care administrative data.

**Setting** Patients registered to primary care practices in England.

**Population** 1,706,368 adults with a positive SARS-CoV-2 PCR or antigen test from August 2020 to January 2022 were included; 13,105 within the hospitalised cohort indexed between August 2020 and March 2021, and 1,693,263 within the primary care cohort indexed between August 2020 and January 2022.

**Main outcome measures** Primary and secondary care HCRU and associated costs during the acute phase of COVID-19 ( $\leq 4$  weeks following positive test), stratified by age group, risk of severe COVID-19 and immunocompromised status.

**Results** Among the hospitalised cohort, average total length of stay, as well as in critical care wards, was longer in older adults. Median healthcare cost per hospitalisation was higher in those aged 75 – 84 (£8,942) and  $\geq 85$  years (£8,835) than in those aged  $< 50$  years (£7,703). Whilst few (6.0%) patients in critical care required mechanical ventilation, its use was higher in older adults (50 – 74 years: 8.3%;  $< 50$  years: 4.3%). HCRU and associated costs were often greater in those at higher risk of severe COVID-19 when compared to the overall cohort, although minimal differences in HCRU were found across the three different high-risk definitions implemented. Among the primary care cohort, GP or nurse consultations were more frequent among older adults and the immunocompromised.

**Conclusions** COVID-19 related hospitalisations in older adults, particularly critical care admissions, were the primary drivers of high resource use of COVID-19 in England. These findings may inform health policy decisions and resource allocation in the prevention and management of COVID-19.

**Keywords:** COVID-19; United Kingdom; healthcare resource utilisation; primary health care; secondary health care; costs.

## INTRODUCTION

Coronavirus disease 2019 (COVID-19) is a highly infectious respiratory illness caused by the severe acute respiratory syndrome-coronavirus-2 virus (SARS-CoV-2). Globally, ~670 million cases and ~6.9 million deaths related to COVID-19 have been recorded as of 9<sup>th</sup> March 2023.<sup>1</sup> Within England, as of 1<sup>st</sup> March 2023 there have been approximately 20.5 million cases, 982,000 hospitalisations and 186,000 associated deaths.<sup>2</sup> The clinical presentation of COVID-19 ranges from asymptomatic to critical illness, where mild or uncomplicated illness is commonly managed in primary care and severe COVID-19 managed in the hospital setting.<sup>3,4</sup> Whilst the majority experience few symptoms or mild to moderate COVID-19, some patients require medical intervention, including respiratory support and intensive care admission.<sup>5</sup> The risk of worse outcomes, e.g. hospitalisation and death, is greater for older adults, smokers, those who are obese, have a compromised immune system, and/or have certain comorbidities such as hypertension and lung disease.<sup>6,7</sup> As such, the Joint Committee on Vaccination and Immunisation (JCVI) recommended the prioritisation of COVID-19 vaccination in specific groups (based on age, those clinically extremely vulnerable, underlying health conditions, pregnancy and working in health and social care).<sup>8</sup>

Whilst the vaccination roll-out has substantially reduced COVID-19 associated morbidity and mortality, COVID-19 remains a significant burden on the UK healthcare system. According to a report published by the UK's Department of Health and Social Care (DHSC) assessing the impacts during the Omicron wave in England, COVID-19 has led to longer waits for elective and emergency visits in the secondary care setting, and across the pandemic COVID-19 has reduced or delayed appointments and referrals in primary care, potentially resulting in a worsened state of health for some primary care patients.<sup>9</sup>

In addition to the health impact of COVID-19, several studies in the United States (US) have quantified the economic burden of COVID-19 related hospitalisations,<sup>10-12</sup> and have reported higher costs among those with health complications. Studies quantifying the economic burden of COVID-19 in the UK are scarce; of the 37 studies identified within a systematic review quantifying the economic impact of COVID-19, five focused on UK-based data, of which two assessed direct healthcare burden attributed to patient care, three assessed the macroeconomic impact of the epidemic and its associated policies and two assessed the costs associated with COVID-19.<sup>13</sup> Only two studies reported use of electronic health records, with no studies reporting the use of general practitioner (GP) appointments data. Keogh-Brown *et al.* report that the impact of COVID-19 on the UK economy was approximately a loss of £40 billion in 2020.<sup>14</sup> However, much of these costs were related to reduced labour (~£39 billion), and whilst overall hospital and intensive care costs were estimated (~£1 billion), these focused on the health-related economic impact on to the UK economy, rather than individual-level costs to the NHS to manage patients with COVID-19. Furthermore, to our knowledge, no studies have reported direct medical costs within the primary care setting. By addressing these data gaps within the literature, we will provide valuable evidence to support health policy decisions on public health interventions and healthcare resource allocation in the prevention and management of COVID-19.

### **Aims and objectives:**

This study aimed to quantify healthcare resource utilisation (HCRU) and costs associated with COVID-19 in adults in England, by age and according to risk of severe COVID-19 and immunocompromised status, separately for those with and without hospitalisation records, using UK primary care data, linked to secondary care data when available.

## METHODS:

### Study design and setting

We conducted a population-based retrospective cohort study using data obtained from the Clinical Practice Research Datalink (CPRD) Aurum primary care database<sup>15</sup> and, when available, linked secondary care data (Hospital Episode Statistics Admitted Patient Care dataset, HES APC).<sup>16</sup> The May 2022 release of CPRD Aurum was used; the latest data from CPRD Aurum covers the period January 1995 to April 2022,<sup>17 18</sup> while HES APC covers April 1997 to March 2021.<sup>16</sup> The study design and methods have been described elsewhere.<sup>19</sup> A study design schematic is provided in Supplementary eFigure 1.

Two distinct patient cohorts were created to describe the economic burden of the acute phase of COVID-19 among adults in the UK:

1. **Hospitalised cohort:** Patients who had a positive SARS-CoV-2 polymerase chain reaction (PCR) or antigen test, or a recorded clinical diagnosis of COVID-19, in their GP record between 1 August 2020 and 31 March 2021 and had a COVID-19 related hospitalisation within 84 days after their positive test result. The index period start date was chosen to align with when it became mandatory for National Health Service (NHS) Test and Trace to report positive PCR test results to the patient's general practitioner (GP) practice, from 20<sup>th</sup> July 2020 onwards;<sup>20</sup> the end date was determined by the end of data availability within HES APC. Patients in this cohort may have also received COVID-19 care outside of the hospital setting e.g. primary care consultations.
2. **Primary care cohort:** Patients who had a positive SARS-CoV-2 PCR or antigen test, or a recorded clinical diagnosis of COVID-19, in their GP record. For persons diagnosed between 1 August 2020 and 31 March 2021, they were included in this cohort if they did not have a record for a COVID-19 related hospitalisation within 84 days of their positive test result. All persons diagnosed with COVID-19 on or after 1 April 2021 were included in this cohort, as this was a period of time for which CPRD did not have hospitalisation data available. The index period end date, January 2022, was determined by the overall cohort design.<sup>19</sup>

### Population

Patients aged  $\geq 18$  years were included in this study. Further details on the eligibility criteria are cited elsewhere.<sup>19</sup> In brief, this study included patients that had: 1) a confirmed COVID-19 episode recorded in CPRD Aurum, where the first date of COVID-19 diagnosis (i.e., index date) was observed in the index period, 2) a minimum registration period of 12 months at their current GP practice prior to the index date, 3) data considered of acceptable research quality as defined by CPRD,<sup>21</sup> and 4) eligible for linkage to HES. Patients were excluded if they had a record for a COVID-19 related hospitalisation or death prior to their GP-recorded date of COVID-19 diagnosis. COVID-19 episodes starting prior to August 2020, from which point capture of COVID-19 test results within GP patient records was considered nearly complete, were not included in the study.

### Demographic and clinical characteristics

Sociodemographic characteristics at index included: age, sex, region of GP practice, ethnicity (using patient history), social deprivation (measured using the Index of Multiple Deprivation (IMD) 2019 score), smoking status (using patient history) and body mass index (BMI) within two years of the

1  
2  
3 index date. Clinical characteristics included Quan-Charlson Comorbidity Index (CCI) 2005<sup>22</sup> within  
4 two years of index, and vaccination status according to immunocompromised status at index.  
5 Vaccination status at index for immunocompetent patients was defined according to whether they  
6 had received 0 doses (unvaccinated), 1 primary dose, 2 primary doses, or any booster dose. For  
7 immunocompromised patients, vaccination status was defined according to whether they had  
8 received 0 doses (unvaccinated), 1 primary dose, 2 primary doses, 3 primary doses, or any booster  
9 dose. A patient was considered vaccinated starting from 14 days after dose receipt, and doses were  
10 required to be separated by at least 21 days. Disease severity among the hospitalised cohort was  
11 assessed using the Ordinal Scale for Clinical Improvement within WHO's COVID-19 Therapeutic Trial  
12 Synopsis,<sup>23</sup> based on the highest level of care received during the hospitalisation following mutually  
13 exclusive categories: 1) hospitalised, no oxygen therapy; 2) oxygen by mask or nasal prongs; 3) non-  
14 invasive ventilation or high-flow oxygen; 4) intubation and mechanical ventilation and 5) ventilation  
15 and additional organ support. Further details on definitions, and operationalisation of code lists are  
16 described elsewhere.<sup>19</sup>  
17  
18  
19  
20  
21  
22

## 23 **Outcomes and follow-up**

### 24 ***Healthcare resource utilisation (HCRU)***

25  
26 All COVID-19 related HCRU and associated costs to the NHS in the four weeks including and  
27 following the index date were calculated and reported for the following elements of HCRU:  
28  
29

30 **Medication use:** Medications that were prescribed within primary care were considered to be  
31 COVID-19 related when prescribed on the same day as a COVID-19 diagnosis (see Supplementary  
32 eTable 1).<sup>24 25</sup>  
33

34 **Primary care consultations:** GP or nurse consultations with a diagnostic code of COVID-19 were  
35 reported separately for face-to-face (F2F) and telephone consultations. This was defined as a  
36 maximum of one visit of each format per person per day, and any additional visits were considered  
37 as data capture errors.  
38

39 **Hospitalisations:** Hospital admissions with a COVID-19 primary diagnosis were assessed within the  
40 hospitalised cohort. Additionally, the mean (standard deviation) and median (interquartile range)  
41 length of stay (LoS) per admission was assessed and reported separately for time spent in hospital  
42 from admission to discharge as well as time spent in high dependency/intensive care units  
43 (HDUs/ICUs). Whether mechanical ventilation treatment was received was also reported. In the  
44 event of multiple hospitalisations (or for critical care, HDU/ICU stays) during the acute COVID-19  
45 phase, the average LoS per person, rather than the cumulative total, was used.  
46  
47

48 **Direct healthcare costs:** Costs were described for patients with one or more event of a given type  
49 only, i.e. resource users, and persons without utilisation were not included in the distributions of  
50 costs presented. The estimation of costs associated with hospitalisations was based on the National  
51 Schedule of NHS Costs (2020/2021) which report costs of admitted patient care by Healthcare  
52 Resource Group (HRG) in England.<sup>26</sup> In order to estimate the cost per hospitalisation, all finished  
53 consultant episodes (FCEs: the time a patient spends in the care of one consultant within their  
54 hospitalisation) within one admission were accounted to derive the total spell (hospitalisation)  
55 cost.<sup>27</sup> In the event that a given person had multiple hospitalisations during the acute phase, cost per  
56 day estimates were obtained by dividing total hospitalisation costs by total LoS per-patient.  
57  
58  
59  
60



1  
2  
3 Primary care consultations (including GP or nurse visits) were costed using information compiled and  
4 provided by the Personal Social Services Research Unit (PSSRU).<sup>28</sup> The direct healthcare cost for each  
5 prescription written in primary care was calculated via the application of cost per unit from the NHS  
6 Drug Tariff.<sup>29</sup>  
7

## 8 **Statistical analysis**

### 9

10 This descriptive study included all patients who met the study eligibility criteria. This study did not  
11 involve hypothesis testing; therefore, formal sample size calculations were not performed. Means  
12 and standard deviation (SD), or median and lower and upper quartile (Q1, Q3) were calculated for  
13 numeric variables, with frequency counts and percentages presented for categorical variables. Per  
14 the design of the study, all results were presented separately for the hospitalised cohort and primary  
15 care cohorts.  
16  
17

## 18 **Stratifying variables**

### 19

20 All outcomes were evaluated by age, high risk status, and immunocompromised status, as previous  
21 studies have shown that healthcare utilisation can differ by age and clinical status.<sup>30 31</sup> Age group  
22 categories were based on the COVID-19 vaccination rollout strategy in the UK: 18 – 49; 50 – 64; 65 –  
23 74; 75 – 84; and 85+. Three separate definitions were used to define persons at greater risk of  
24 severe COVID-19: 1) the McInnes Advisory Group highest risk group (a list of conditions to identify  
25 persons at the very highest risk of COVID hospitalisation and death, as defined by an advisory group  
26 chaired by Prof Iain McInnes and supported by the NHS England RAPID-C19 team (the McInnes  
27 Advisory Group)),<sup>32</sup> 2) eligibility for the PANORAMIC study (a randomised trial of antiviral  
28 therapeutic agents including patients who were deemed at a higher risk of hospitalisation and death  
29 (PANORAMIC))<sup>33</sup> and 3) the UK Health Security Agency (UKHSA) clinical groups, outlined in COVID-  
30 19: the Green Book, chapter 14a (JCVI's COVID-19 vaccination prioritisation criteria) (the Green  
31 Book).<sup>8</sup> The code lists for each high risk definition were developed using reproducible search terms  
32 with multiple reviewers, have been previously described and published.<sup>19</sup> For immune system status,  
33 patients were classified as immunocompromised at the time of receipt of first COVID-19 vaccine  
34 dose if they had one or more codes meeting Davidson *et al.*'s definition of immunocompromised  
35 status.<sup>34</sup> All analyses were conducted in SAS version 9.4 (SAS Institute, Cary, North Carolina).  
36  
37  
38

## 39 **Patient and Public Involvement**

### 40

41 There was no direct involvement of patients and public in this study. However, we aim to  
42 disseminate the findings through appropriate channels.  
43

## 44 **RESULTS:**

### 45

### 46 **Patient sociodemographic and clinical characteristics**

#### 47

48 A total of 1,706,368 adult COVID-19 cases were included in this study. Of the 471,128 patients  
49 diagnosed between 1<sup>st</sup> August 2020 and 31<sup>st</sup> March 2021, 13,105 (2.8%) patients were included in  
50 the hospitalised cohort; 1,693,263 were included in the primary care cohort. **Table 1** summarises the  
51 baseline patient characteristics across the hospitalised and primary care cohorts.  
52  
53

54 Among the hospitalised cohort, the majority (n=9,978; 76.1%) of patients were aged ≥50 years  
55 (mean age [SD]: 60.7 [16] years), more than half (n=7,504; 57.3%) were male, 66.9% were of white  
56 ethnic origin, and 46.6% (n=6,102) lived in areas with greatest deprivation (IMD quintiles 4 and 5).  
57

58 Of those with known smoking status, 56.7% (n=5,500) had a history of smoking. Over half (n=6,974;  
59 53.2%) were overweight or obese according to BMI, and among those with a BMI record, this  
60

1  
2  
3 increased to 84.8%. Over half of patients (n=7,078; 54.0%) had a CCI score of 0. The majority (98.6%)  
4 of the hospitalised cohort were defined as immunocompetent in baseline, of whom 98.1% were  
5 unvaccinated at index (n=12,684; 98.1%).  
6

7  
8 The proportions of patients meeting the McInnes Advisory Group, PANORAMIC and the Green Book  
9 definitions, respectively were 33.0% (n=4,323), 84.0% (n=11,011) and 40.8% (n=5,341). Most (73.3%)  
10 patients did not receive oxygen therapy during their hospitalisation, and few patients (n=847; 6.5%)  
11 received intubation or ventilation support.  
12

13 Sociodemographic characteristics of the primary care cohort differed numerically from the  
14 hospitalised cohort: the majority (n=1,161,843; 68.6%) of patients were aged <50 years (mean age  
15 [SD]: 42.3 [15.8] years), more than half (n=928,546; 54.8%) were female, and patients were  
16 relatively evenly spread across socioeconomic quintiles. However, the distribution across ethnicity  
17 groups was similar to the hospitalised cohort.  
18

19  
20 When considering the clinical characteristics, among those with known smoking status 52.0% had a  
21 smoking history, and 24.4% were overweight or obese (n=414,037). Most patients (n=1,462,791;  
22 86.4%) had a CCI score of 0. Unlike the hospitalised cohort, vaccination status was more varied;  
23 among the 1,629,716 (96.2%) immunocompetent patients in the primary care cohort, 40.5% were  
24 unvaccinated.  
25

26  
27 Relatively fewer patients than in the hospitalised cohort were at risk of severe COVID-19 across all  
28 three definitions (McInnes Advisory Group: n=250,329, 14.8%; PANORAMIC: n=691,593, 40.8% and  
29 the Green Book: n=212,556, 12.6%).  
30  
31  
32  
33  
34  
35  
36  
37  
38  
39  
40  
41  
42  
43  
44  
45  
46  
47  
48  
49  
50  
51  
52  
53  
54  
55  
56  
57  
58  
59  
60

**Table 1: Demographic and clinical characteristics of the study population at baseline**

| Characteristics                               | Hospitalised cohort<br>(n=13,105)<br>n (%) | Primary care cohort (n=1,693,263)<br>n (%) |
|-----------------------------------------------|--------------------------------------------|--------------------------------------------|
| <b>Age, years</b>                             |                                            |                                            |
| Mean (SD)                                     | 60.7 (16.0)                                | 42.3 (15.8)                                |
| 18-49                                         | 3,127 (23.9%)                              | 1,161,843 (68.6%)                          |
| 50-64                                         | 4,844 (37.0%)                              | 379,528 (22.4%)                            |
| 65-74                                         | 2,386 (18.2%)                              | 92,573 (5.5%)                              |
| 75-84                                         | 1,690 (12.9%)                              | 40,481 (2.4%)                              |
| ≥85                                           | 1,058 (8.1%)                               | 18,838 (1.1%)                              |
| <b>Sex</b>                                    |                                            |                                            |
| Male                                          | 7,504 (57.3%)                              | 764,687 (45.2%)                            |
| Female                                        | 5,601 (42.7%)                              | 928,546 (54.8%)                            |
| Unknown                                       | 0                                          | 30 (<0.1%)                                 |
| <b>GP practice region</b>                     |                                            |                                            |
| North East                                    | 465 (3.6%)                                 | 65,755 (3.9%)                              |
| North West                                    | 2,872 (21.9%)                              | 363,770 (21.5%)                            |
| Yorkshire and The Humber                      | 339 (2.6%)                                 | 53,777 (3.2%)                              |
| East Midlands                                 | 213 (1.6%)                                 | 38,663 (2.3%)                              |
| West Midlands                                 | 2,057 (15.7%)                              | 278,170 (16.4%)                            |
| East of England                               | 413 (3.2%)                                 | 66,446 (3.9%)                              |
| London                                        | 2,965 (22.6%)                              | 335,233 (19.8%)                            |
| South East                                    | 2,670 (20.4%)                              | 317,898 (18.8%)                            |
| South West                                    | 1,111 (8.5%)                               | 173,317 (10.2%)                            |
| Unknown                                       | 0                                          | 234 (<0.1%)                                |
| <b>Ethnicity</b>                              |                                            |                                            |
| White                                         | 8,769 (66.9%)                              | 1,106,974 (65.4%)                          |
| Black                                         | 467 (3.6%)                                 | 45,177 (2.7%)                              |
| Asian                                         | 1,651 (12.6%)                              | 108,603 (6.4%)                             |
| Mixed                                         | 108 (0.8%)                                 | 17,757 (1.1%)                              |
| Other                                         | 329 (2.5%)                                 | 34,726 (2.1%)                              |
| Unknown                                       | 1,781 (13.6%)                              | 380,026 (22.4%)                            |
| <b>Index of Multiple Deprivation (2019)</b>   |                                            |                                            |
| Quintile 1 (least deprived)                   | 2,166 (16.5%)                              | 335,374 (19.8%)                            |
| Quintile 2                                    | 2,342 (17.9%)                              | 336,418 (19.9%)                            |
| Quintile 3                                    | 2,488 (19.0%)                              | 325,643 (19.2%)                            |
| Quintile 4                                    | 2,881 (22.0%)                              | 353,803 (20.1%)                            |
| Quintile 5 (most deprived)                    | 3,221 (24.6%)                              | 340,894 (20.1%)                            |
| Unknown                                       | 7 (<0.1%)                                  | 1,131 (0.1%)                               |
| <b>Smoking</b>                                |                                            |                                            |
| Current smoker                                | 1,690 (12.9%)                              | 293,016 (17.3%)                            |
| Ex-smoker                                     | 3,810 (29.1%)                              | 283,693 (16.8%)                            |
| Never smoked                                  | 4,196 (32.0%)                              | 532,804 (31.5%)                            |
| Unknown                                       | 3,409 (26.0%)                              | 583,750 (34.5%)                            |
| <b>BMI</b>                                    |                                            |                                            |
| Underweight                                   | 94 (0.7%)                                  | 13,657 (0.8%)                              |
| Normal                                        | 1,154 (8.8%)                               | 201,500 (11.9%)                            |
| Overweight                                    | 2,388 (18.2%)                              | 198,235 (11.7%)                            |
| Obese                                         | 4,586 (35.0%)                              | 215,802 (12.7%)                            |
| Unknown                                       | 4,883 (37.3%)                              | 1,064,069 (62.8%)                          |
| <b>Quan Charlson Comorbidity Index (2005)</b> |                                            |                                            |
| Mean (SD)                                     | 1.0 (1.7)                                  | 0.2 (0.7)                                  |
| 0                                             | 7,078 (54.0%)                              | 1,462,791 (86.4%)                          |
| 1-2                                           | 4,232 (32.3%)                              | 197,557 (11.7%)                            |
| 3-4                                           | 1,160 (8.9%)                               | 24,240 (1.4%)                              |
| ≥5                                            | 635 (4.9%)                                 | 8,675 (0.5%)                               |
| <b>Immunocompromised status</b>               |                                            |                                            |
| Immunocompetent                               | 12,924 (98.6%)                             | 1,629,716 (96.2%)                          |
| Immunocompromised                             | 181 (1.4%)                                 | 63,547 (3.8%)                              |
| <b>Vaccination status: immunocompetent</b>    |                                            |                                            |
| Unvaccinated                                  | 12,684 (98.1%)                             | 660,610 (40.5%)                            |
| 1 dose                                        | 240 (1.9%)                                 | 125,129 (7.7%)                             |
| 2 doses                                       | 0                                          | 593,557 (36.4%)                            |
| First booster dose                            | 0                                          | 250,420 (15.4%)                            |
| <b>Vaccination status: immunocompromised</b>  |                                            |                                            |

|                                              |                |                 |
|----------------------------------------------|----------------|-----------------|
| Unvaccinated                                 | 102 (56.4%)    | 1,154 (1.8%)    |
| 1 dose                                       | 79 (43.7%)     | 5,314 (8.4%)    |
| 2 doses                                      | 0              | 33,731 (53.1%)  |
| 3 doses                                      | 0              | 23,082 (36.3%)  |
| First booster dose                           | 0              | 266 (0.4%)      |
| <b>Risk of severe COVID-19</b>               |                |                 |
| McInnes Advisory Group                       | 4,323 (33.0%)  | 250,329 (14.8%) |
| PANORAMIC                                    | 11,011 (84.0%) | 691,593 (40.8%) |
| Green Book                                   | 5,341 (40.8%)  | 212,556 (12.6%) |
| <b>COVID-19 severity<sup>a</sup></b>         |                |                 |
| No oxygen therapy                            | 9,606 (73.3%)  | -               |
| Low-flow oxygen                              | 793 (6.1%)     | -               |
| Non-invasive ventilation or high-flow oxygen | 1,859 (14.2%)  | -               |
| Intubation/mechanical ventilation            | 822 (6.3%)     | -               |
| Ventilation and additional organ support     | 25 (0.2%)      | -               |

<sup>a</sup> Highest level of severity experienced during the hospitalisation.

For peer review only

## Healthcare resource utilisation (HCRU) and associated costs

### *Hospitalised cohort*

The median total spell length of stay (LoS), including both general ward as well as critical care admission, was 6.0 days. The LoS was longer for older patients; median length of stay was 5.0 days for those aged 18 – 49 years, 6.0 days for age 50 – 64 years, and 8.0 days for age  $\geq 65$  years (**Table 2**). When stratified by risk of severe COVID-19, LoS was similar across definitions (median 7.0 days [Q1: 4.0, Q3: 12.0]). The median LoS was one day longer in immunocompromised patients (7.0 [4.0, 12.0]) compared to those immunocompetent (6.0 [4.0, 12.0]).

Of the 13,105 hospitalised patients, 1,934 (14.8%) were admitted to critical care. The median LoS in critical care was 8.0 days. The proportion requiring critical care, as well as LoS, was greatest among the aged 50-64 and 65-74 groups. Critical care LoS was similar for persons meeting each risk definitions as well as by immunocompromised status when compared to the overall cohort.

Median healthcare cost per hospitalisation was lower in those aged 18 – 49 years (£7,703) than in those aged 75 – 84 years (£8,942) and  $\geq 85$  years (£8,835), and was similar across the risk definitions (£8,727) and immunocompromised status (£8,727 in the immunocompromised and immunocompetent groups). The median non-critical care costs followed similar patterns, whereas median observed critical care costs were higher among immunocompetent patients (£17,439) than among immunocompromised patients (£14,551). The mean number of FCEs per hospitalisation was 2.0, with FCEs ranging between 1-7 for immunocompromised patients and 1-16 patients for immunocompetent patients (data not shown in tables).

Median costs of critical care requiring mechanical ventilation (MV) was broadly similar across all stratifications. Overall, the proportion of hospitalised patients who received MV was low ( $n=792$ ; 6.0%) and increased with age (4.3%, for ages 18 – 49, 8.2% for ages 50 – 64 and 8.6% for ages 65 – 74 years), but decreased after age 74. MV use varied slightly across the risk definitions, with the highest use in the PANORAMIC group (6.5%), and lowest in the Green Book group (5.2%). Among people who received MV, the median length of ventilation was 1.0 day; this did not differ across stratifications.

Telephone consultations with a GP or nurse ( $n=5,077$ ; 38.7%) were more common than F2F consultations ( $n=2,489$ ; 19.0%) (Supplementary materials: eTable 2). Telephone visits remained the main mode of consultation when stratified by age and risk definition, particularly for older adults, people at high risk of severe COVID-19 and immunocompromised patients. When assessing COVID-19 associated medication use, only 29 (0.2%) patients received a primary care prescription from their GP to manage or treat COVID-19 (Supplementary materials eTable 2).

**Table 2: HCRU in the four weeks after index stratified by age, risk of severe COVID-19 and immunocompromised status at baseline among the hospitalised cohort**

| HCRU                                     | Age stratifications |                 |                 |                 |                 |                 | Risk criteria                    |                      |                       | Immunocompromised status at baseline |                            |
|------------------------------------------|---------------------|-----------------|-----------------|-----------------|-----------------|-----------------|----------------------------------|----------------------|-----------------------|--------------------------------------|----------------------------|
|                                          | All (n=13,105)      | 18-49 (n=3,127) | 50-64 (n=4,844) | 65-74 (n=2,386) | 75-84 (n=1,690) | ≥85 (n=1,058)   | McInnes Advisory Group (n=4,323) | PANORAMIC (n=11,011) | Green Book (n= 5,341) | Immunocompromised (n=181)            | Immunocompetent (n=12,924) |
| <b>Length of hospital stay (in days)</b> |                     |                 |                 |                 |                 |                 |                                  |                      |                       |                                      |                            |
| Mean (SD)                                | 9.2 (10.0)          | 6.4 (8.1)       | 9.0 (10.1)      | 10.8 (10.9)     | 11.2 (10.2)     | 11.4 (9.7)      | 9.9 (10.0)                       | 9.8 (10.2)           | 10.0 (9.8)            | 9.0 (6.7)                            | 9.2 (10.0)                 |
| Median (Q1, Q3)                          | 6.0 (4.0, 11.0)     | 5.0 (2.0, 7.0)  | 6.0 (4.0, 10.0) | 8.0 (5.0, 13.0) | 8.0 (5.0, 14.0) | 8.0 (5.0, 15.0) | 7.0 (4.0, 12.0)                  | 7.0 (4.0, 12.0)      | 7.0 (4.0, 12.0)       | 7.0 (4.5, 12.0)                      | 6.0 (4.0, 11.0)            |
| <b>Critical care admission</b>           |                     |                 |                 |                 |                 |                 |                                  |                      |                       |                                      |                            |
| n (%)                                    | 1,934 (14.8%)       | 399 (12.8%)     | 896 (18.5%)     | 456 (19.1%)     | 165 (9.8%)      | 18 (1.7%)       | 608 (14.1%)                      | 1,687 (15.3%)        | 695 (13.0%)           | 10 (5.5%)                            | 1,924 (14.9%)              |
| <b>Length of stay in critical care</b>   |                     |                 |                 |                 |                 |                 |                                  |                      |                       |                                      |                            |
| Mean (SD)                                | 11.5 (11.2)         | 9.7 (10.9)      | 12.3 (11.8)     | 12.3 (11.1)     | 10.0 (8.9)      | 5.3 (5.6)       | 11.4 (10.9)                      | 11.7 (11.1)          | 11.2 (10.6)           | 9.0 (5.8)                            | 11.5 (11.3)                |
| Median (Q1, Q3)                          | 8.0 (4.0, 15.0)     | 6.0 (4.0, 11.0) | 8.5 (5.0, 16.0) | 9.0 (5.0, 15.0) | 8.0 (4.0, 14.0) | 4.0 (1.0, 7.0)  | 8.0 (5.0, 15.0)                  | 8.0 (5.0, 15.0)      | 8.0 (5.0, 14.0)       | 8.5 (4.0, 13.0)                      | 8.0 (4.2, 15.0)            |
| <b>Mechanical ventilation</b>            |                     |                 |                 |                 |                 |                 |                                  |                      |                       |                                      |                            |
| n (%)                                    | 792 (6.0%)          | 135 (4.3%)      | 398 (8.2%)      | 204 (8.6%)      | 55 (3.3%)       | 0               | 250 (5.8%)                       | 713 (6.5%)           | 278 (5.2%)            | <5                                   | 790 (6.1%)                 |
| <b>Mechanical ventilation days</b>       |                     |                 |                 |                 |                 |                 |                                  |                      |                       |                                      |                            |
| Mean (SD)                                | 1.2 (0.5)           | 1.2 (0.4)       | 1.2 (0.4)       | 1.2 (0.5)       | 1.1 (0.4)       | 0               | 1.2 (0.4)                        | 1.2 (0.5)            | 1.2 (0.4)             | N/A*                                 | 1.2 (0.5)                  |
| Median (Q1, Q3)                          | 1.0 (1.0, 1.0)      | 1.0 (1.0, 1.0)  | 1.0 (1.0, 1.0)  | 1.0 (1.0, 1.0)  | 1.0 (1.0, 1.0)  | 0               | 1.0 (1.0, 1.0)                   | 1.0 (1.0, 1.0)       | 1.0 (1.0, 1.0)        | N/A*                                 | 1.0 (1.0, 1.0)             |

In the event of multiple hospitalisations (or critical care stays) during the acute COVID-19 phase, the average per person, rather than the cumulative total, was used.

\*Suppressed to comply with the reporting rules.

**Table 3: Costs in the four weeks after index stratified by age, risk of severe COVID-19 and immunocompromised status at baseline among the hospitalised cohort**

| Costs                                                                        | Age stratifications     |                         |                         |                         |                         |                       | Risk criteria                     |                         |                         | Immunocompromised status at baseline |                            |
|------------------------------------------------------------------------------|-------------------------|-------------------------|-------------------------|-------------------------|-------------------------|-----------------------|-----------------------------------|-------------------------|-------------------------|--------------------------------------|----------------------------|
|                                                                              | All (n= 13,105)         | 18-49 (n= 3,127)        | 50-64 (n= 4,844)        | 65-74 (n= 2,386)        | 75-84 (n= 1,690)        | ≥85 (n=1,058)         | McInnes Advisory Group (n= 4,323) | PANORAMIC (n= 11,011)   | Green Book (n= 5,341)   | Immunocompromised (n=181)            | Immunocompetent (n=12,924) |
| <b>Healthcare cost per hospitalisation (£)</b>                               |                         |                         |                         |                         |                         |                       |                                   |                         |                         |                                      |                            |
| Mean (SD)                                                                    | 13,059 (18,659)         | 10,215 (16,242)         | 14,396 (21,874)         | 15,655 (20,965)         | 12,500 (12,409)         | 10,365 (6,773)        | 13,436 (17,582)                   | 13,693 (19,028)         | 13,009 (16,509)         | 10,814 (8,525)                       | 13,090 (18,761)            |
| Median (Q1, Q3)                                                              | 8,727 (4,364, 13,091)   | 7,703 (2,994, 11,600)   | 8,727 (4,364, 14,317)   | 8,727 (4,471, 17,399)   | 8,942 (5,800, 13,413)   | 8,835 (5,800, 13,091) | 8,727 (4,471, 14,450)             | 8,727 (4,364, 13,759)   | 8,727 (4,471, 13,413)   | 8,727 (5,800, 13,063)                | 8,727 (4,364, 13,091)      |
| <b>Healthcare cost of non-critical care admission (£)</b>                    |                         |                         |                         |                         |                         |                       |                                   |                         |                         |                                      |                            |
| Mean (SD)                                                                    | 9,360 (7,275)           | 7,516 (6,294)           | 9,199 (7,028)           | 10,366 (7,990)          | 10,898 (7,787)          | 10,876 (7,308)        | 10,059 (7,634)                    | 9,761 (7,412)           | 10,041 (7,536)          | 10,283 (6,511)                       | 9,347 (7,284)              |
| Median (Q1, Q3)                                                              | 8,727 (4,364, 12,799)   | 5,800 (2,259, 8,942)    | 8,727 (4,364, 12,561)   | 8,727 (4,364, 13,091)   | 8,942 (5,800, 13,091)   | 8,942 (5,800, 13,413) | 8,727 (4,364, 13,091)             | 8,727 (4,364, 13,091)   | 8,727 (4,364, 13,091)   | 8,727 (5,800, 13,091)                | 8,727 (4,364, 12,764)      |
| <b>Healthcare cost of critical care admission (£)</b>                        |                         |                         |                         |                         |                         |                       |                                   |                         |                         |                                      |                            |
| Mean (SD)                                                                    | 30,352 (35,116)         | 26,321 (34,702)         | 32,617 (37,578)         | 32,784 (33,219)         | 23,463 (25,529)         | 8,501 (8,689)         | 29,441 (32,155)                   | 30,988 (34,876)         | 29,150 (31,633)         | 19,345 (15,827)                      | 30,409 (35,181)            |
| Median (Q1, Q3)                                                              | 17,439 (9,285, 39,663)  | 11,332 (7,555, 30,039)  | 19,569 (9,444, 42,351)  | 22,421 (9,444, 41,808)  | 16,999 (7,474, 31,356)  | 5,617 (1,482, 9,444)  | 18,887 (9,285, 38,768)            | 18,887 (9,444, 39,860)  | 18,887 (9,444, 38,468)  | 14,551 (7,555, 27,096)               | 17,439 (9,285, 39,663)     |
| <b>Healthcare cost of critical care requiring mechanical ventilation (£)</b> |                         |                         |                         |                         |                         |                       |                                   |                         |                         |                                      |                            |
| Mean (SD)                                                                    | 51,103 (42,055)         | 52,000 (43,415)         | 52,071 (44,628)         | 51,106 (37,077)         | 41,379 (36,238)         | -                     | 46,364 (38,594)                   | 50,686 (41,554)         | 48,677 (38,050)         | 39,029 (23,487)                      | 51,135 (42,098)            |
| Median (Q1, Q3)                                                              | 40,148 (23,517, 64,772) | 39,860 (19,930, 77,057) | 41,768 (24,912, 61,556) | 39,860 (23,517, 67,263) | 34,877 (18,291, 55,637) | -                     | 37,369 (20,904, 57,486)           | 39,860 (23,855, 62,712) | 38,981 (22,421, 61,200) | 39,029 (22,421, 55,637)              | 40,148 (23,517, 64,813)    |

Blank cells (i.e. "-") are due those aged ≥85 years not receiving mechanical ventilation.

### Primary care cohort

The proportion of patients with  $\geq 1$  F2F GP or nurse consultation was higher in the older age groups (aged  $\geq 85$  years: 12.7%; aged 18 – 49 years: 3.4%;) (**Table 4**). Similar patterns were observed for  $\geq 1$  telephone consultations, however greater use was observed across all ages (aged 18 – 49 years: 6.1%; aged  $\geq 85$  years: 25.8%) when compared to F2F consultations.

When assessing those at risk of severe COVID-19, we observed a similar proportion of patients with  $\geq 1$  F2F consultations across the three risk definitions (McInnes Advisory Group: 6.8%; PANORAMIC: 5.9% and the Green Book: 8.1%). However, the patterns of  $\geq 1$  telephone-based consultation slightly differed across the three risk definitions; with highest use noted for the Green Book criteria (17.3%) and lowest for the PANORAMIC criteria (12.4%). Of immunocompromised patients, 7.2% had at least one F2F consultation and 14.8% had at least one telephone consultation, in comparison to 4.1% and 7.8% for immunocompetent patients, respectively.

Among the primary care cohort,  $<1.0\%$  ( $n=253$ ) of patients received a primary care prescription for treatment of COVID-19.

The overall median costs were higher for F2F consultations compared to a telephone consultation among those with  $\geq 1$  primary care GP or nurse consultation: £39 (Q1, Q3: £7, £39) and £16 (Q1, Q3: £16, £16), respectively (**Table 5**). These costs did not differ across the age, risk definition and immunocompromised status stratification for either the F2F or telephone consultations. The costs associated with treatment in the primary care setting were also analysed. Given the low prescribing associated with COVID-19 diagnoses in the primary care cohort, the associated medication costs were negligible, with the exception of costs among those who were immunocompromised (median cost: £21; Q1, Q3: £3, £566).



**Table 4: HCRU in the four weeks after index stratified by age, risk of severe COVID-19 and immunocompromised status at baseline among the primary care cohort**

| HCRU                                                                  | All<br>(n=1,693,263) | Age stratifications    |                      |                     |                     |                   | Risk criteria                               |                          |                           | Immunocompromised status at baseline |                                      |
|-----------------------------------------------------------------------|----------------------|------------------------|----------------------|---------------------|---------------------|-------------------|---------------------------------------------|--------------------------|---------------------------|--------------------------------------|--------------------------------------|
|                                                                       |                      | 18-49<br>(n=1,161,843) | 50-64<br>(n=379,528) | 65-74<br>(n=92,573) | 75-84<br>(n=40,481) | ≥85<br>(n=18,838) | McInnes<br>Advisory<br>Group<br>(n=250,329) | PANORAMIC<br>(n=691,593) | Green Book<br>(n=212,556) | Immunocompr<br>omised<br>(n=63,547)  | Immunocomp<br>etent<br>(n=1,629,716) |
| <b>Any COVID-19 medication use:</b> n (%)                             | 253<br>(<1.0%)       | 69<br>(<1.0%)          | 63<br>(<1.0%)        | 33<br>(<1.0%)       | 39<br>(0.1%)        | 49<br>(0.3%)      | 158<br>(0.1%)                               | 214<br>(<1.0%)           | 116 (0.1%)                | 51<br>(0.1%)                         | 202<br>(<1.0%)                       |
| <b>Primary care consultations-F2F:</b> number with ≥ 1 visit (%)      | 71,039<br>(4.2%)     | 39,108 (3.4%)          | 19,330 (5.1%)        | 6,491 (7.0%)        | 3,726 (9.2%)        | 2,384 (12.7%)     | 16,989 (6.8%)                               | 40,991 (5.9%)            | 17,237<br>(8.1%)          | 4,587<br>(7.2%)                      | 66,452 (4.1%)                        |
| <b>Primary care consultations-Telephone:</b> number with ≥ 1 call (%) | 137,148<br>(8.1%)    | 70,675 (6.1%)          | 40,311<br>(10.6%)    | 13,434<br>(14.5%)   | 7,860 (19.4%)       | 4,868 (25.8%)     | 35,935<br>(14.4%)                           | 86,002<br>(12.4%)        | 36,852<br>(17.3%)         | 9,375<br>(14.8%)                     | 127,773<br>(7.8%)                    |

Among COVID cases managed in the community, none had record of receipt of nirmatrelvir/ritonavir, remdesivir, casirivimab/imdevimab or baricitinib.

**Table 5: Costs in the four weeks after index stratified by age, risk of severe COVID-19 and immunocompromised status at baseline among the primary care cohort**

| Costs                                            | Age stratifications |                     |                   |                  |                  |                | Risk criteria                      |                        |                        | Immunocompromised status at baseline |                               |
|--------------------------------------------------|---------------------|---------------------|-------------------|------------------|------------------|----------------|------------------------------------|------------------------|------------------------|--------------------------------------|-------------------------------|
|                                                  | All (n=1,693,263)   | 18-49 (n=1,161,843) | 50-64 (n=379,528) | 65-74 (n=92,573) | 75-84 (n=40,481) | ≥85 (n=18,838) | McInnes Advisory Group (n=250,329) | PANORAMI C (n=691,593) | Green Book (n=212,556) | Immunocompromised (n=63,547)         | Immunocompetent (n=1,629,716) |
| <b>Medication cost (£)</b>                       |                     |                     |                   |                  |                  |                |                                    |                        |                        |                                      |                               |
| Mean (SD)                                        | 165 (465)           | 242 (538)           | 204 (505)         | 134 (447)        | 187 (530)        | 8 (36)         | 206 (518)                          | 159 (457)              | 161 (448)              | 486 (759)                            | 83 (307)                      |
| Median (Q1, Q3)                                  | 2 (2, 4)            | 3 (2, 256)          | 2 (2, 24)         | 2 (2, 3)         | 3 (1, 10)        | 3 (1, 3)       | 3 (2, 21)                          | 2 (2, 4)               | 3 (2, 9)               | 21 (3, 566)                          | 2 (2, 3)                      |
| <b>Primary care consultations- F2F (£)</b>       |                     |                     |                   |                  |                  |                |                                    |                        |                        |                                      |                               |
| Mean (SD)                                        | 27 (22)             | 26 (21)             | 28 (22)           | 27 (24)          | 27 (25)          | 27 (24)        | 28 (24)                            | 28 (23)                | 28 (25)                | 28 (25)                              | 27 (22)                       |
| Median (Q1, Q3)                                  | 39 (7, 39)          | 39 (7, 39)          | 39 (7, 39)        | 39 (7, 39)       | 39 (7, 39)       | 39 (7, 39)     | 39 (7, 39)                         | 39 (7, 39)             | 39 (7, 39)             | 39 (7, 39)                           | 39 (7, 397)                   |
| <b>Primary care consultations- Telephone (£)</b> |                     |                     |                   |                  |                  |                |                                    |                        |                        |                                      |                               |
| Mean (SD)                                        | 18 (10)             | 17 (9)              | 18 (10)           | 18 (10)          | 19 (11)          | 20 (13)        | 18 (11)                            | 18 (10)                | 19 (11)                | 18 (10)                              | 18 (9)                        |
| Median (Q1, Q3)                                  | 16 (16, 16)         | 16 (16, 16)         | 16 (16, 16)       | 16 (16, 16)      | 16 (16, 16)      | 16 (16, 16)    | 16 (16, 16)                        | 16 (16, 16)            | 16 (16, 16)            | 16 (16, 16)                          | 16 (16, 16)                   |

## DISCUSSION

To the best of our knowledge, this is the first study to quantify HCRU and related costs specific to the acute phase of COVID-19 in all adults (both standard and high-risk) within the primary and secondary care settings in England. Costs and HCRU were primarily driven by COVID-19 associated hospitalisations, particularly among older adults and those admitted to critical care, which imposed direct medical cost and resource use burden on the UK healthcare system.

Our findings on the overall LoS (6.0 days) were consistent with national estimates, indicating between August 2020 to March 2021 the median LoS ranged from 4-11 days.<sup>35</sup> However, our data only covered early waves of the COVID-19 pandemic, where LoS fluctuated over time due to varying factors such as variant predominance, changes in COVID-19 testing guidance and COVID-19 vaccinations.<sup>36</sup> For the patients admitted to critical care, we observed a median LoS of 8 days. A retrospective cohort study of patients admitted to ICU between March and May 2020, using COVID-19 Hospitalisation in England Surveillance System (CHESS) data found median LoS ranged from 10-12 days.<sup>37</sup> This lower LoS observed in our study might partly be explained by refinements made to the treatment and management of COVID-19 patients over the course of the pandemic, starting with the publication of critical care guidance in March 2020.<sup>38 39</sup> Further, we found critical care LoS was not monotonic with age and therefore its associated costs, which is also aligned with previous studies.<sup>37</sup> <sup>40</sup> It is possible that the LoS observed in patients aged  $\geq 85$  years was biased due to survivorship with a shorter apparent LoS due to an increased risk of death in the older ages. The proportion of patients admitted to critical care (14.8%) and requiring MV (6.0%) were also consistent with published English estimates over a longer data coverage period (10.6% and 5.6%, respectively).<sup>41</sup>

Our cost estimates associated with COVID-19 hospitalisation are similar to those used by the National Institute for Health and Care Excellence (NICE) Technology Appraisal assessing therapeutics for people with COVID-19, although the report restricted to severe COVID-19 patients and used non-comparable methodology.<sup>42</sup> Data from other countries, for instance a retrospective study of hospitalised COVID-19 patients in the US from 1 April to 31 December 31 2020 using claims data, estimated the average cost per day for overall admissions and ICU admissions was \$1,772 and \$2,902, respectively,<sup>43</sup> with evidence from Italy reporting the hospitalisation cost per day varying based on the complexity of care (low-complexity = €476; medium-complexity = €700; high-complexity = €1,402).<sup>44</sup> However, the generalisability of these estimates to the UK population are limited given differences in populations, data coverage period, COVID-19 management strategies, and healthcare systems. Notably, due to variability within the relatively smaller immunocompromised and hospitalised, it is likely that our findings related to costs in this group differ to existing studies.<sup>45-47</sup> However, as these patients are at an increased risk of severe COVID-19, they are likely to experience high HCRU and costs. Also, very minimal differences in HCRU were found across the different high-risk groups that were either prioritized for treatment (Highest risk group), eligible for the PANORAMIC clinical trial (PANORAMIC eligibility) or eligible for vaccination prioritization (Green book). All three subgroups incurred similar non-critical and critical care hospitalisation costs.

In the primary care setting, several major changes in the use of healthcare services occurred since the start of the pandemic, including: a reduction in health services (postponing non-urgent planned treatment and redeployment of NHS staff),<sup>48</sup> an increased use of telemedicine resulting from a change in policy (F2F appointments only when clinically necessary),<sup>49</sup> and a reluctance among patients to seek F2F care.<sup>50-52</sup> These factors may explain the higher use of GP or nurse telephone consultation across both study cohorts, and overall limited use of GP or nurse consultations amongst the primary care cohort.

1  
2  
3 Our findings demonstrated that COVID-19 related hospitalisation continues to pose substantial  
4 pressure and cost to the healthcare system in England.<sup>9</sup> This study reinforces the importance of  
5 continuing efforts with the UK COVID-19 vaccination program in reducing hospitalisation and  
6 severity of the disease.<sup>53</sup> Policy makers and healthcare professionals should persist with encouraging  
7 high vaccination coverage, specifically among vulnerable groups and those at higher risk of  
8 hospitalisation with COVID-19.<sup>54</sup>  
9

### 10 11 **Limitations of the study**

12 Our study has several limitations. First, whilst CPRD covers 24% of the population in England,<sup>55</sup> our  
13 previous published work found an underrepresentation of COVID-19 patients aged  $\geq 65$  years,  
14 particularly in the hospitalised cohort, and overrepresentation of patients living in specific English  
15 regions, such as London and the South East, for these two cohorts<sup>49</sup> and thus our findings should be  
16 interpreted with caution. Second, due to data latency, HES APC data was only available up to March  
17 2021 and emergency department as well as outpatient data were unavailable. For patients in the  
18 primary care cohort after April 2021, hospitalization status is unknown and therefore are unable to  
19 describe the HCRU and costs associated with more recent waves of the coronavirus pandemic. Cost  
20 estimates in the hospitalised immunocompromised patients should be interpreted with caution due  
21 to the smaller sample size. Lastly, our findings on the limited primary care prescriptions for the  
22 treatment of COVID-19 are expected given the first antiviral for COVID-19 in the UK was approved in  
23 November 2021,<sup>56</sup> which occurred towards the end of the study period,<sup>57</sup> the UK's stringent access  
24 criteria when compared to other countries, and due to our definition of medication use (prescription  
25 on the same day as a COVID-19 diagnosis).  
26  
27

28 Future studies with a larger sample size are required to better quantify the economic burden of  
29 COVID-19 among immunocompromised patients. Studies should also explore the consequences of  
30 post-COVID conditions, to incorporate other aspects of HCRU e.g., readmissions, and the indirect  
31 costs associated with COVID-19 such as employment related sickness absence. Further, a better  
32 understanding of the health and social care needs of patients recovering from or who continue to  
33 experience symptoms of COVID-19 is required.  
34  
35

### 36 **CONCLUSION**

37  
38 The present retrospective cohort study quantified COVID-19 HCRU and associated costs in England.  
39 Although the burden of COVID-19 has reduced following the rollout of COVID-19 vaccines in the UK,  
40 we observed substantial economic burden due to COVID-19 on the NHS. Importantly, this study  
41 showed much of the burden during the study period was driven by COVID-19 related  
42 hospitalisations, and that older adults are associated with higher burden. Findings from this study  
43 can be used to inform the long-term strategy for resource allocation in the management of COVID-  
44 19.  
45  
46

### 47 **WHAT IS ALREADY KNOWN ON THIS TOPIC**

- 49 • Since the start of the pandemic, COVID-19 has been associated ~982,000 hospitalisations  
50 and ~186,000 deaths in England
- 51 • Whilst the UK vaccination rollout has significantly reduced COVID-19 related morbidity and  
52 mortality, COVID-19 related hospitalisations and the associated impact remain high  
53  
54

### 55 **WHAT THIS STUDY ADDS**

- 56 • During the acute phase of COVID-19 prior to omicron dominance, the majority of patients  
57 were managed within the primary care setting
- 58 • Hospitalisations, critical care admissions and increasing age (up to 65 years) were drivers of  
59 the higher healthcare resource use and related costs associated with COVID-19 in England  
60

- Immunocompromised patients are likely to have high COVID-19 related HCRU and costs, however studies with larger sample size are needed to confirm this
- Very minimal differences in HCRU were found across the different high-risk groups that were either prioritized for treatment (McInnes Advisory Group), eligible for the PANORAMIC clinical trial (PANORAMIC) or eligible for vaccination (Green Book).

For peer review only

## Acknowledgments

Editorial/medical writing support under the guidance of the authors was provided by Dr Gary Sidgwick PhD of Adelphi Real World, Bollington UK, in accordance with Good Publication Practice 2022 (GPP 2022) guidelines (<https://www.ismpp.org/gpp-2022>).

The authors gratefully acknowledge Tamuno Alfred, Darren Kailung Jeng and Chern Chuan Soo from Pfizer Inc. (New York, United States), Agnieszka Gajewska, Tomasz Mikołajczyk, Ewa Śleszyńska-Dopiera from Quanticate (Warsaw, Poland) and Olivia Massey from Adelphi Real World for statistical programming support.

## Copyright

The corresponding author has the right to grant on behalf of all authors and does grant on behalf of all authors, a worldwide licence to the Publishers and its licensees in perpetuity, in all forms, formats and media (whether known now or created in the future), to i) publish, reproduce, distribute, display and store the Contribution, ii) translate the Contribution into other languages, create adaptations, reprints, include within collections and create summaries, extracts and/or, abstracts of the Contribution, iii) create any other derivative work(s) based on the Contribution, iv) to exploit all subsidiary rights in the Contribution, v) the inclusion of electronic links from the Contribution to third party material where-ever it may be located; and, vi) licence any third party to do any or all of the above.

## Competing interests

All authors have completed the ICMJE uniform disclosure form at <http://www.icmje.org/disclosure-of-interest/> and declare: Jingyan Yang, Kathleen M. Andersen, Maya Reimbaeva, Leah McGrath, Carmen Tsang, Tendai Mugwagwa, Kevin Naicker, Diana Mendes, Tamuno Alfred, Mary Araghi and Jennifer L Nguyen are employees of Pfizer and may hold stock or stock options. Kiran K. Rai, Theo Tritton, Poppy Payne, Bethany Backhouse and Robert Wood are employees of Adelphi Real World, which received funds from Pfizer to conduct the study and develop the manuscript.

## Author contributions

The corresponding author, Jingyan Yang, attests that all listed authors meet authorship criteria and that no others meeting the criteria have been omitted.

All authors were involved in: 1) conception or design, or analysis and interpretation of data; 2) drafting and revising the article; 3) providing intellectual content of critical importance to the work described; and 4) final approval of the version to be published, and therefore meet the criteria for authorship in accordance with the International Committee of Medical Journal Editors (ICMJE) guidelines. In addition, all named authors take responsibility for the integrity of the work as a whole and have given their approval for this version to be published.

## Role of the funding source

Funding for this study was provided by Pfizer Inc. The study protocol was developed collaboratively by Pfizer and Adelphi Real World. The protocol was independently reviewed and approved by CPRD's Research Data Governance (RDG) committee, and the analysis was conducted by Pfizer Inc. Adelphi Real World wrote the manuscript, and both Pfizer and Adelphi Real World reviewed and approved the manuscript prior to submission.

### **Ethical approval**

CPRD's Research Data Governance (RDG) committee approved this study (CPRD study ID: 22\_002062) in July 2022 prior to obtaining the data relevant to the project. This study complied with all applicable laws regarding subject privacy. As all patient-level data were fully anonymised, and no direct patient contact or primary collection of individual patient data occurred, patient consent was not required.

### **Dissemination to participants and related patient and public communities**

The study findings will be disseminated to the public through appropriate channels.

### **Data sharing statement**

**Data may be obtained from a third party and are not publicly available.** Anonymised patient data were accessed under study-specific approvals. Electronic health records are considered sensitive data in the UK by the Data Protection Act and cannot be shared. Access to the primary care data and linked datasets could be requested from the Clinical Practice Research Datalink <https://www.cprd.com/research-applications>.

### **Transparency declaration**

The lead author affirms that this manuscript is an honest, accurate, and transparent account of the study being reported; that no important aspects of the study have been omitted; and that any discrepancies from the study as planned (and, if relevant, registered) have been explained.

### **Prior publication:**

Data in this manuscript were accepted as three separate poster presentations at the International Society for Pharmacoeconomics and Outcomes Research (ISPOR) 2023, Boston, USA, in May 2023.

## REFERENCES

1. Johns Hopkins University of Medicine. Coronavirus Resource Center Dashboard 2023 [09 March 2023]. Available from: <https://coronavirus.jhu.edu/> accessed 09 March 2023.
2. GOV.UK. UK Summary - Coronavirus (COVID-19) in the UK 2023 [09 March 2023]. Available from: <https://coronavirus.data.gov.uk/> accessed 09 March 2023.
3. National Institute for Health and Care Excellence. COVID-19 rapid guideline: Managing COVID-19 2023 [13 March 2023]. Available from: <https://www.nice.org.uk/guidance/ng191/resources/covid19-rapid-guideline-managing-covid19-pdf-51035553326> accessed 13 March 2023.
4. World Health Organization (WHO). Therapeutics and COVID-19: living guideline 2023 [13 March 2023]. Available from: <https://app.magicapp.org/#/guideline/nBkO1E/section/EKDKdj> accessed 13 March 2023.
5. Soriano JB, Murthy S, Marshall JC, et al. A clinical case definition of post-COVID-19 condition by a Delphi consensus. *The Lancet Infectious Diseases* 2022;22(4):e102-e07. doi: [https://doi.org/10.1016/S1473-3099\(21\)00703-9](https://doi.org/10.1016/S1473-3099(21)00703-9)
6. Wolff D, Nee S, Hickey NS, et al. Risk factors for Covid-19 severity and fatality: a structured literature review. *Infection* 2021;49(1):15-28. doi: 10.1007/s15010-020-01509-1 [published Online First: 2020/08/30]
7. Tazerji SS, Shahabinejad F, Tokasi M, et al. Global data analysis and risk factors associated with morbidity and mortality of COVID-19. *Gene Reports* 2022;26:101505. doi: <https://doi.org/10.1016/j.genrep.2022.101505>
8. UK Health Security Agency (UKHSA). COVID-19: the green book, chapter 14a, pg 1-54 2022 [09 March 2023]. Available from: <https://www.gov.uk/government/publications/covid-19-the-green-book-chapter-14a> accessed 09 March 2023.
9. GOV.UK. Direct and indirect health impacts of COVID-19 in England: emerging Omicron impacts 04 August 2022 [24 March 2023]. Available from: <https://www.gov.uk/government/publications/direct-and-indirect-health-impacts-of-covid-19-in-england-emerging-omicron-impacts/direct-and-indirect-health-impacts-of-covid-19-in-england-emerging-omicron-impacts> accessed 24 March 2023.
10. Cunningham JW, Vaduganathan M, Claggett BL, et al. Clinical Outcomes in Young US Adults Hospitalized With COVID-19. *JAMA Internal Medicine* 2021;181(3):379-81. doi: 10.1001/jamainternmed.2020.5313
11. Di Fusco M, Shea KM, Lin J, et al. Health outcomes and economic burden of hospitalized COVID-19 patients in the United States. *Journal of Medical Economics* 2021;24(1):308-17. doi: 10.1080/13696998.2021.1886109
12. Lavery AM, Preston LE, Ko JY, et al. Characteristics of Hospitalized COVID-19 Patients Discharged and Experiencing Same-Hospital Readmission - United States, March-August 2020. *MMWR Morb Mortal Wkly Rep* 2020;69(45):1695-99. doi: 10.15585/mmwr.mm6945e2 [published Online First: 2020/11/13]
13. Richards F, Kodjamanova P, Chen X, et al. Economic Burden of COVID-19: A Systematic Review. *ClinicoEconomics and Outcomes Research* 2022;14:293-307. doi: 10.2147/CEOR.S338225
14. Keogh-Brown MR, Jensen HT, Edmunds WJ, et al. The impact of Covid-19, associated behaviours and policies on the UK economy: A computable general equilibrium model. *SSM Popul Health* 2020;12:100651. doi: 10.1016/j.ssmph.2020.100651 [published Online First: 2020/10/20]
15. Clinical Practice Research Datalink (CPRD). CPRD Aurum March 2022 (Version 2022.03.001) [Data set]. Clinical Practice Research Datalink. 2022 [09 March 2023]. Available from: <https://doi.org/10.48329/MY9S-4X08> accessed 09 March 2023.
16. Clinical Practice Research Datalink (CPRD). CPRD linked data 2022 [09 March 2023]. Available from: <https://cprd.com/cprd-linked-data> accessed 09 March 2023.
17. Clinical Practice Research Datalink (CPRD). Release Notes: CPRD Aurum May 2022 [09 March 2023]. Available from: <https://cprd.com/sites/default/files/2022-05/2022-05%20CPRD%20Aurum%20Release%20Notes.pdf> accessed 09 March 2023.
18. Clinical Practice Research Datalink (CPRD). Feasibility counts for SARS-CoV-2-related codes in CPRD primary care data May 2022 [09 March 2023]. Available from: <https://cprd.com/sites/default/files/2022-05/SARS-CoV-2%20counts%20May2022.pdf> accessed 09 March 2023.



19. Andersen KM, McGrath LJ, Reimbaeva M, et al. Persons Diagnosed with COVID in England in the Clinical Practice Research Datalink (CPRD): A Cohort Description. *medRxiv* 2023:2023.03.17.23287415. doi: 10.1101/2023.03.17.23287415
20. NHS Digital. Coronavirus test results now visible to GPs 20 July 2020 [09 March 2023]. Available from: <https://digital.nhs.uk/news/2020/coronavirus-test-results-now-visible-to-gps> accessed 09 March 2023.
21. Clinical Practice Research Datalink (CPRD). CPRD Aurum Glossary of terms/Data definitions v2.0 [13 March 2023]. Available from: <https://cprd.com/sites/default/files/2023-02/CPRD%20Aurum%20Glossary%20Terms%20v2.pdf> accessed 13 March 2023.
22. Quan H, Sundararajan V, Halfon P, et al. Coding algorithms for defining comorbidities in ICD-9-CM and ICD-10 administrative data. *Med Care* 2005;43(11):1130-9. doi: 10.1097/01.mlr.0000182534.19832.83 [published Online First: 2005/10/15]
23. World Health Organization (WHO). COVID-19 Therapeutic Trial Synopsis 2020 [09 March 2023]. Available from: <https://www.who.int/publications/i/item/covid-19-therapeutic-trial-synopsis> accessed 09 March 2023.
24. NHS England. Interim Clinical Commissioning Policy: Treatments for non-hospitalised patients with COVID-19 28 November 2022 [09 March 2023]. Available from: <https://www.england.nhs.uk/coronavirus/wp-content/uploads/sites/52/2022/11/C1710-interim-clinical-commissioning-policy-treatments-for-non-hospitalised-patients-with-covid-19-nov-22.pdf> accessed 09 March 2023.
25. National Institute for Health and Care Excellence. Managing COVID 19: treatments (May 2022 v24.0) 2022 [
26. NHS England. National Cost Collection for the NHS 2020/2021 2021 [09 March 2023]. Available from: <https://www.england.nhs.uk/costing-in-the-nhs/national-cost-collection/> accessed 09 March 2023.
27. NHS Digital. Hospital Admitted Patient Care Activity 2020-21 16 September 2021 [14 March 2023]. Available from: <https://digital.nhs.uk/data-and-information/publications/statistical/hospital-admitted-patient-care-activity/2020-21> accessed 14 March 2023.
28. Personal Social Services Research Unit (PSSRU). Unit Costs of Health and Social Care 2022 [09 March 2023]. Available from: <https://www.pssru.ac.uk/project-pages/unit-costs/> accessed 09 March 2023.
29. NHS Business Services Authority (NHSBSA). Drug Tariff 2022 [09 March 2023]. Available from: <https://www.nhsbsa.nhs.uk/pharmacies-gp-practices-and-appliance-contractors/drug-tariff> accessed 09 March 2023.
30. Intensive Care National Audit and Research Centre (ICNARC). COVID-19 Report 2023 [14 March 2023]. Available from: <https://www.icnarc.org/our-audit/audits/cmp/reports> accessed 14 March 2023.
31. Ioannou GN, Locke E, Green P, et al. Risk Factors for Hospitalization, Mechanical Ventilation, or Death Among 10 131 US Veterans With SARS-CoV-2 Infection. *JAMA Network Open* 2020;3(9):e2022310-e10. doi: 10.1001/jamanetworkopen.2020.22310
32. Department of Health and Social Care. Defining the highest-risk clinical subgroups upon community infection with SARS-CoV-2 when considering the use of neutralising monoclonal antibodies (nMABs) and antiviral drugs: independent advisory group report 2022 [09 March 2023]. Available from: <https://www.gov.uk/government/publications/higher-risk-patients-eligible-for-covid-19-treatments-independent-advisory-group-report/defining-the-highest-risk-clinical-subgroups-upon-community-infection-with-sars-cov-2-when-considering-the-use-of-neutralising-mono-clonal-antibodies> accessed 09 March 2023.
33. University of Oxford. PANORAMIC - Help find effective early treatments for COVID-19 2022 [09 March 2023]. Available from: <https://www.panoramictrial.org/> accessed 09 March 2023.
34. Davidson JA, Banerjee A, Smeeth L, et al. Risk of acute respiratory infection and acute cardiovascular events following acute respiratory infection among adults with increased cardiovascular risk in England between 2008 and 2018: a retrospective, population-based cohort study. *The Lancet Digital Health* 2021;3(12):e773-e83. doi: 10.1016/S2589-7500(21)00203-X
35. The Nuffield Trust. Chart of the week: How long do Covid-19 patients spend in hospital? 01 February 2023 [16 March 2023]. Available from: <https://www.nuffieldtrust.org.uk/resource/chart-of-the-week-how-long-do-covid-19-patients-spend-in-hospital-1> accessed 16 March 2023.

- 1  
2  
3 36. Yaesoubi R, You S, Xi Q, et al. Simple decision rules to predict local surges in COVID-19  
4 hospitalizations during the winter and spring of 2022. *medRxiv* 2021:2021.12.13.21267657.  
5 doi: 10.1101/2021.12.13.21267657
- 6 37. Shryane N, Pampaka M, Aparicio-Castro A, et al. Length of Stay in ICU of Covid-19 patients in  
7 England, March - May 2020. *Int J Popul Data Sci* 2021;5(4):1411. doi:  
8 10.23889/ijpds.v5i4.1411 [published Online First: 2021/05/20]
- 9 38. Peter Bamford, Andrew Bentley, Jane Dean, et al. Intensive Care Society Guidance for Prone  
10 Positioning of the Conscious COVID Patient 2020 April 2020 [24 March 2023]. Available from:  
11 [https://emcrit.org/wp-content/uploads/2020/04/2020-04-12-Guidance-for-conscious-](https://emcrit.org/wp-content/uploads/2020/04/2020-04-12-Guidance-for-conscious-proning.pdf)  
12 [proning.pdf](https://emcrit.org/wp-content/uploads/2020/04/2020-04-12-Guidance-for-conscious-proning.pdf) accessed 24 March 2023.
- 13 39. National Institute for Health and Care Excellence. COVID-19 rapid guideline: critical care in adults  
14 (ng159) 20 March 2020 [updated 12 February 2021 24 March 2023]. Available from:  
15 <https://www.nice.org.uk/guidance/ng159> accessed 24 March 2023.
- 16 40. Intensive Care National Audit and Research Centre (ICNARC). ICNARC report on COVID-19 in  
17 critical care 03 July 2020 [24 March 2023]. Available from:  
18 [https://www.icnarc.org/DataServices/Attachments/Download/da626009-65bd-ea11-9127-](https://www.icnarc.org/DataServices/Attachments/Download/da626009-65bd-ea11-9127-00505601089b)  
19 [00505601089b](https://www.icnarc.org/DataServices/Attachments/Download/da626009-65bd-ea11-9127-00505601089b) accessed 24 March 2023.
- 20 41. Thygesen JH, Tomlinson C, Hollings S, et al. COVID-19 trajectories among 57 million adults in  
21 England: a cohort study using electronic health records. *The Lancet Digital Health*  
22 2022;4(7):e542-e57. doi: 10.1016/S2589-7500(22)00091-7
- 23 42. National Institute for Health and Care Excellence. Multiple Technology Appraisal - Therapeutics  
24 for people with COVID-19 [ID4038] Committee Papers 2023 [cited 24 March 2023. Available  
25 from: <https://www.nice.org.uk/guidance/gid-ta10936/documents/committee-papers-2>  
26 accessed 24 March 2023.
- 27 43. Ohsfeldt RL, Choong CK, Mc Collam PL, et al. Inpatient Hospital Costs for COVID-19 Patients in  
28 the United States. *Adv Ther* 2021;38(11):5557-95. doi: 10.1007/s12325-021-01887-4  
29 [published Online First: 2021/10/06]
- 30 44. Foglia E, Ferrario L, Schettini F, et al. COVID-19 and hospital management costs: the Italian  
31 experience. *BMC Health Serv Res* 2022;22(1):991. doi: 10.1186/s12913-022-08365-9  
32 [published Online First: 2022/08/04]
- 33 45. Walker JL, Grint DJ, Strongman H, et al. UK prevalence of underlying conditions which increase  
34 the risk of severe COVID-19 disease: a point prevalence study using electronic health  
35 records. *BMC Public Health* 2021;21(1):484. doi: 10.1186/s12889-021-10427-2 [published  
36 Online First: 2021/03/13]
- 37 46. Soley-Bori M, Ashworth M, Bisquera A, et al. Impact of multimorbidity on healthcare costs and  
38 utilisation: a systematic review of the UK literature. *British Journal of General Practice*  
39 2021;71(702):e39-e46. doi: 10.3399/bjgp20X713897
- 40 47. Goldman JD, Robinson PC, Uldrick TS, et al. COVID-19 in immunocompromised populations:  
41 implications for prognosis and repurposing of immunotherapies. *Journal for ImmunoTherapy*  
42 *of Cancer* 2021;9(6):e002630. doi: 10.1136/jitc-2021-002630
- 43 48. The Health Foundation. Non-COVID-19 NHS care during the pandemic - Activity trends for key  
44 NHS services in England 12 December 2020 [13 March 2023]. Available from:  
45 [https://www.health.org.uk/news-and-comment/charts-and-infographics/non-covid-19-nhs-](https://www.health.org.uk/news-and-comment/charts-and-infographics/non-covid-19-nhs-care-during-the-pandemic)  
46 [care-during-the-pandemic](https://www.health.org.uk/news-and-comment/charts-and-infographics/non-covid-19-nhs-care-during-the-pandemic) accessed 13 March 2023.
- 47 49. Ahmed S, Sanghvi K, Yeo D. Telemedicine takes centre stage during COVID-19 pandemic. *BMJ*  
48 *Innovations* 2020;6(4):252-54. doi: 10.1136/bmjinnov-2020-000440
- 49 50. National Institute for Health and Care Research. How have GP practices adapted to the COVID-  
50 19 pandemic? 2020 [13 March 2023]. Available from: [https://arc-](https://arc-w.nihr.ac.uk/research/projects/collecting-rapid-covid-19-intelligence-to-improve-primary-care-response/)  
51 [w.nihr.ac.uk/research/projects/collecting-rapid-covid-19-intelligence-to-improve-primary-care-](https://arc-w.nihr.ac.uk/research/projects/collecting-rapid-covid-19-intelligence-to-improve-primary-care-response/)  
52 [response/](https://arc-w.nihr.ac.uk/research/projects/collecting-rapid-covid-19-intelligence-to-improve-primary-care-response/) accessed 13 March 2023.
- 53 51. The Health Foundation. Public confidence in using NHS returning but concerns persist among  
54 groups worst affected by COVID-19 10 September 2020 [13 March 2023]. Available from:  
55 [https://www.health.org.uk/news-and-comment/news/public-confidence-in-using-nhs-returning-](https://www.health.org.uk/news-and-comment/news/public-confidence-in-using-nhs-returning-but-concerns-persist)  
56 [but-concerns-persist](https://www.health.org.uk/news-and-comment/news/public-confidence-in-using-nhs-returning-but-concerns-persist) accessed 13 March 2023.
- 57 52. The Health Foundation. How has the COVID-19 pandemic impacted primary care? 27 May 2021  
58 [13 March 2023]. Available from: [https://www.health.org.uk/news-and-comment/charts-and-](https://www.health.org.uk/news-and-comment/charts-and-infographics/how-has-the-covid-19-pandemic-impacted-primary-care)  
59 [infographics/how-has-the-covid-19-pandemic-impacted-primary-care](https://www.health.org.uk/news-and-comment/charts-and-infographics/how-has-the-covid-19-pandemic-impacted-primary-care) accessed 13 March  
60 2023.
53. Rahmani K, Shavaleh R, Frouhi M, et al. The effectiveness of COVID-19 vaccines in reducing  
the incidence, hospitalization, and mortality from COVID-19: A systematic review and meta-

- 1  
2  
3 analysis. *Front Public Health* 2022;10:873596. doi: 10.3389/fpubh.2022.873596 [published  
4 Online First: 2022/09/13]
- 5 54. Cook TM, Roberts JV. Impact of vaccination by priority group on UK deaths, hospital admissions  
6 and intensive care admissions from COVID-19. *Anaesthesia* 2021;76(5):608-16. doi:  
7 10.1111/anae.15442 [published Online First: 2021/02/12]
- 8 55. Wolf A, Dedman D, Campbell J, et al. Data resource profile: Clinical Practice Research Datalink  
9 (CPRD) Aurum. *International Journal of Epidemiology* 2019;48(6):1740-40g. doi:  
10 10.1093/ije/dyz034
- 11 56. GOV.UK. First oral antiviral for COVID-19, Lagevrio (molnupiravir), approved by MHRA 04  
12 November 2021 [13 March 2023]. Available from: [https://www.gov.uk/government/news/first-](https://www.gov.uk/government/news/first-oral-antiviral-for-covid-19-lagevrio-molnupiravir-approved-by-mhra)  
13 [oral-antiviral-for-covid-19-lagevrio-molnupiravir-approved-by-mhra](https://www.gov.uk/government/news/first-oral-antiviral-for-covid-19-lagevrio-molnupiravir-approved-by-mhra) accessed 13 March 2023.
- 14 57. GOV.UK. Government launches COVID-19 Antivirals Taskforce to roll out innovative home  
15 treatments this autumn 20 April 2021 [13 March 2023]. Available from:  
16 [https://www.gov.uk/government/news/government-launches-covid-19-antivirals-taskforce-to-](https://www.gov.uk/government/news/government-launches-covid-19-antivirals-taskforce-to-roll-out-innovative-home-treatments-this-autumn)  
17 [roll-out-innovative-home-treatments-this-autumn](https://www.gov.uk/government/news/government-launches-covid-19-antivirals-taskforce-to-roll-out-innovative-home-treatments-this-autumn) accessed 13 March 2023.
- 18  
19  
20  
21  
22  
23  
24  
25  
26  
27  
28  
29  
30  
31  
32  
33  
34  
35  
36  
37  
38  
39  
40  
41  
42  
43  
44  
45  
46  
47  
48  
49  
50  
51  
52  
53  
54  
55  
56  
57  
58  
59  
60

SUPPLEMENTARY MATERIALS: “Healthcare resource utilisation and costs of hospitalisation and primary care among adults in England: a population-based cohort study” (Yang, Andersen, Rai et al 2023)

**Supplementary eFigure 1** Study design schematic

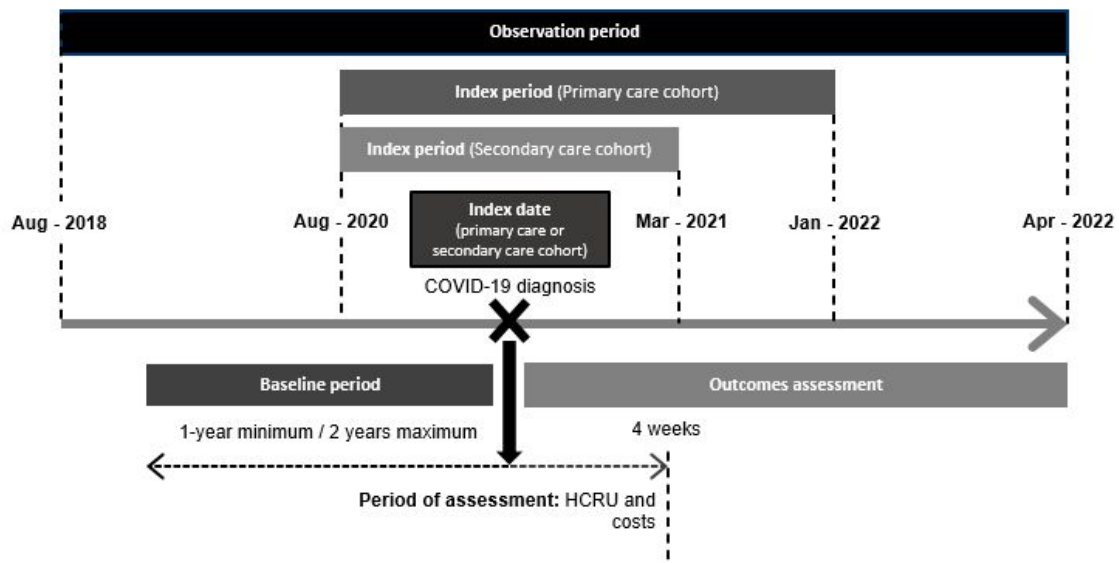

Note: When assessing disease severity, the highest level of severity experienced during the hospitalisation was reported.

**Supplementary eTable 1** COVID-19-related medications

| Generic name           |
|------------------------|
| Nirmatrelvir/ritonavir |
| Sotrovimab             |
| Molnupiravir           |
| Casirivimab/imdevimab  |
| Remdesivir             |
| Dexamethasone          |
| Tocilizumab            |
| Sarilumab              |
| Baricitinib            |

C4591042 COVID HCRU Adults manuscript – Supplementary materials

**Supplementary eTable 2** Primary care HCRU stratified by age, risk of severe COVID and immunocompromised status at baseline among the hospitalised cohort

| HCRU                                                               | All<br>(n=13,105) | Age stratifications |                    |                    |                    |                  | Risk criteria                             |                         |                             | Immunocompromised status<br>at baseline |                      |
|--------------------------------------------------------------------|-------------------|---------------------|--------------------|--------------------|--------------------|------------------|-------------------------------------------|-------------------------|-----------------------------|-----------------------------------------|----------------------|
|                                                                    |                   | 18-49<br>(n=3,127)  | 50-64<br>(n=4,844) | 65-74<br>(n=2,386) | 75-84<br>(n=1,690) | ≥85<br>(n=1,058) | McInnes<br>Advisory<br>Group<br>(n=4,323) | PANORAMIC<br>(n=11,011) | Green<br>Book<br>(n= 5,341) | IC<br>(n=181)                           | Non-IC<br>(n=12,924) |
| Any COVID-19 medication use: n, (%)                                | 29<br>(0.2%)      | 6 (0.2%)            | 9 (0.2%)           | 5 (0.2%)           | 5 (0.3%)           | <5               | 14<br>(0.3%)                              | 27<br>(0.3%)            | 15<br>(0.3%)                | <5                                      | 28<br>(0.2%)         |
| Primary care consultations- F2F: number<br>with ≥ 1 visit (%)      | 2,489 (19.0%)     | 559 (17.9%)         | 921 (19.0%)        | 425 (17.8%)        | 354 (21.0%)        | 230 (21.7%)      | 900 (20.8%)                               | 2,124<br>(19.3%)        | 1,093<br>(20.5%)            | 31<br>(17.1%)                           | 2,458 (19.0%)        |
| Primary care consultations- Telephone:<br>number with ≥ 1 call (%) | 5,077 (38.7%)     | 1,178<br>(37.7%)    | 1,840<br>(38.0%)   | 949 (39.8%)        | 701 (41.5%)        | 409 (38.7%)      | 1,815 (42.0%)                             | 4,341<br>(39.4%)        | 2,306<br>(43.2%)            | 87<br>(48.1%)                           | 4,990 (38.6%)        |

IC: immunocompromised; Non-IC: non-immunocompromised also known as immunocompetent.

C4591042 COVID HCRU Adults manuscript – Supplementary materials

**Supplementary eTable 3** Primary care costs stratified by age, risk of severe COVID and immunocompromised status at baseline among the hospitalised cohort

|                                                          | All<br>(n= 13,105)   | Age stratifications  |                      |                      |                      |                      | Risk criteria                           |                          |                          | Immunocompromised status<br>at baseline |                      |
|----------------------------------------------------------|----------------------|----------------------|----------------------|----------------------|----------------------|----------------------|-----------------------------------------|--------------------------|--------------------------|-----------------------------------------|----------------------|
|                                                          |                      | 18-49<br>(n= 3,127)  | 50-64<br>(n= 4,844)  | 65-74<br>(n= 2,386)  | 75-84<br>(n= 1,690)  | ≥85<br>(n=1,058)     | McInnes<br>Advisory Group<br>(n= 4,323) | PANORAMIC<br>(n= 11,011) | Green Book<br>(n= 5,341) | IC<br>(n=181)                           | Non-IC<br>(n=12,924) |
| <b>Medication cost (£)</b>                               |                      |                      |                      |                      |                      |                      |                                         |                          |                          |                                         |                      |
| Mean (SD)                                                | 4.8 (15.4)           | 1.8 (1.1)            | 1.9 (1.5)            | 2.6 (1.4)            | 2.2 (1.3)            | 22.2 (41.6)          | 8.2 (22.0)                              | 5.1 (15.9)               | 7.7 (21.3)               | 0.6 (-)                                 | 5.0 (15.7)           |
| Median<br>(Q1, Q3)                                       | 1.8 (1.2, 2.5)       | 1.5 (0.9, 2.5)       | 1.3 (1.2, 1.8)       | 1.8 (1.8, 2.5)       | 2.5 (1.3, 2.8)       | 1.9 (0.9,<br>43.6)   | 2.5 (1.3, 3.6)                          | 1.8 (1.2, 2.5)           | 2.5 (1.3, 3.6)           | 0.6 (0.6, 0.6)                          | 1.8 (1.2, 2.5)       |
| <b>Primary care<br/>consultations- F2F (£)</b>           |                      |                      |                      |                      |                      |                      |                                         |                          |                          |                                         |                      |
| Mean (SD)                                                | 30.5 (26.5)          | 31.4 (30.3)          | 31.9 (24.7)          | 30.5 (26.3)          | 28.7 (28.1)          | 25.5 (20.1)          | 30.0 (24.6)                             | 30.4 (25.8)              | 30.0 (25.6)              | 35.6 (27.1)                             | 30.4 (26.5)          |
| Median<br>(Q1, Q3)                                       | 39.2<br>(6.8, 39.2)  | 13.5<br>(6.8, 39.2)  | 39.2<br>(6.8, 39.2)                     | 39.2<br>(6.8, 39.2)      | 39.2<br>(6.8, 39.2)      | 39.2<br>(13.5, 39.2)                    | 39.2<br>(6.8, 39.2)  |
| <b>Primary care<br/>consultations-<br/>Telephone (£)</b> |                      |                      |                      |                      |                      |                      |                                         |                          |                          |                                         |                      |
| Mean (SD)                                                | 22.5 (13.8)          | 23.2 (14.7)          | 22.7 (13.6)          | 22.2 (14.0)          | 21.6 (13.1)          | 21.4 (12.5)          | 23.0 (14.2)                             | 22.4 (13.6)              | 22.8 (13.9)              | 23.0 (15.5)                             | 22.5 (13.8)          |
| Median<br>(Q1, Q3)                                       | 15.5<br>(15.5, 31.0)                    | 15.5<br>(15.5, 31.0)     | 15.5<br>(15.5, 31.0)     | 15.5<br>(15.5, 31.0)                    | 15.5<br>(15.5, 31.0) |

**IC: immunocompromised; Non-IC: non-immunocompromised also known as immunocompetent.**

1 STROBE Statement—Checklist of items that should be included in reports of *cohort studies*

|                              | Item No | Recommendation                                                                                                                                                                                                                                                                                                                                                                                                                                                     |
|------------------------------|---------|--------------------------------------------------------------------------------------------------------------------------------------------------------------------------------------------------------------------------------------------------------------------------------------------------------------------------------------------------------------------------------------------------------------------------------------------------------------------|
| <b>Title and abstract</b>    | 1       | (a) Indicate the study's design with a commonly used term in the title or the abstract<br><a href="#">PAGE 1</a><br>(b) Provide in the abstract an informative and balanced summary of what was done and what was found <a href="#">PAGE 2</a>                                                                                                                                                                                                                     |
| <b>Introduction</b>          |         |                                                                                                                                                                                                                                                                                                                                                                                                                                                                    |
| Background/rationale         | 2       | Explain the scientific background and rationale for the investigation being reported<br><a href="#">PAGE 3</a>                                                                                                                                                                                                                                                                                                                                                     |
| Objectives                   | 3       | State specific objectives, including any prespecified hypotheses <a href="#">PAGE 3</a>                                                                                                                                                                                                                                                                                                                                                                            |
| <b>Methods</b>               |         |                                                                                                                                                                                                                                                                                                                                                                                                                                                                    |
| Study design                 | 4       | Present key elements of study design early in the paper <a href="#">PAGE 4</a>                                                                                                                                                                                                                                                                                                                                                                                     |
| Setting                      | 5       | Describe the setting, locations, and relevant dates, including periods of recruitment, exposure, follow-up, and data collection <a href="#">PAGE 4</a>                                                                                                                                                                                                                                                                                                             |
| Participants                 | 6       | (a) Give the eligibility criteria, and the sources and methods of selection of participants. Describe methods of follow-up <a href="#">PAGE 4</a><br>(b) For matched studies, give matching criteria and number of exposed and unexposed<br>N/A                                                                                                                                                                                                                    |
| Variables                    | 7       | Clearly define all outcomes, exposures, predictors, potential confounders, and effect modifiers. Give diagnostic criteria, if applicable <a href="#">PAGE 4, 5, 6</a>                                                                                                                                                                                                                                                                                              |
| Data sources/<br>measurement | 8*      | For each variable of interest, give sources of data and details of methods of assessment (measurement). Describe comparability of assessment methods if there is more than one group <a href="#">PAGE 4</a>                                                                                                                                                                                                                                                        |
| Bias                         | 9       | Describe any efforts to address potential sources of bias <a href="#">PAGE 5</a>                                                                                                                                                                                                                                                                                                                                                                                   |
| Study size                   | 10      | Explain how the study size was arrived at <a href="#">PAGE 6</a>                                                                                                                                                                                                                                                                                                                                                                                                   |
| Quantitative<br>variables    | 11      | Explain how quantitative variables were handled in the analyses. If applicable, describe which groupings were chosen and why <a href="#">PAGE 6</a>                                                                                                                                                                                                                                                                                                                |
| Statistical methods          | 12      | (a) Describe all statistical methods, including those used to control for confounding<br><a href="#">PAGE 6</a><br>(b) Describe any methods used to examine subgroups and interactions <a href="#">PAGE 6</a><br>(c) Explain how missing data were addressed N/A<br>(d) If applicable, explain how loss to follow-up was addressed N/A<br>(e) Describe any sensitivity analyses N/A                                                                                |
| <b>Results</b>               |         |                                                                                                                                                                                                                                                                                                                                                                                                                                                                    |
| Participants                 | 13*     | (a) Report numbers of individuals at each stage of study—eg numbers potentially eligible, examined for eligibility, confirmed eligible, included in the study, completing follow-up, and analysed <a href="#">PAGE 6</a><br>(b) Give reasons for non-participation at each stage N/A<br>(c) Consider use of a flow diagram <a href="#">Due to limited eligibility criteria and retrospective nature of study design, we have opted to keep information in text</a> |
| Descriptive data             | 14*     | (a) Give characteristics of study participants (eg demographic, clinical, social) and information on exposures and potential confounders <a href="#">PAGE 6, 7, 8, 9</a><br>(b) Indicate number of participants with missing data for each variable of interest <a href="#">PAGE 8, 9</a><br>(c) Summarise follow-up time (eg, average and total amount) N/A                                                                                                       |
| Outcome data                 | 15*     | Report numbers of outcome events or summary measures over time <a href="#">PAGE 10, 11, 12, 13, 14, 15</a>                                                                                                                                                                                                                                                                                                                                                         |

|    |                          |    |                                                                                                                                                                                                                                                      |
|----|--------------------------|----|------------------------------------------------------------------------------------------------------------------------------------------------------------------------------------------------------------------------------------------------------|
| 1  | Main results             | 16 | (a) Give unadjusted estimates and, if applicable, confounder-adjusted estimates and their precision (eg, 95% confidence interval). Make clear which confounders were adjusted for and why they were included <a href="#">PAGE 10, 11, 12, 14, 15</a> |
| 2  |                          |    | (b) Report category boundaries when continuous variables were categorized <a href="#">PAGE 8, 9</a>                                                                                                                                                  |
| 3  |                          |    | (c) If relevant, consider translating estimates of relative risk into absolute risk for a meaningful time period <a href="#">N/A</a>                                                                                                                 |
| 4  |                          |    |                                                                                                                                                                                                                                                      |
| 5  |                          |    |                                                                                                                                                                                                                                                      |
| 6  |                          |    |                                                                                                                                                                                                                                                      |
| 7  |                          |    |                                                                                                                                                                                                                                                      |
| 8  |                          |    |                                                                                                                                                                                                                                                      |
| 9  | Other analyses           | 17 | Report other analyses done—eg analyses of subgroups and interactions, and sensitivity analyses <a href="#">N/A</a>                                                                                                                                   |
| 10 |                          |    |                                                                                                                                                                                                                                                      |
| 11 | <b>Discussion</b>        |    |                                                                                                                                                                                                                                                      |
| 12 |                          |    |                                                                                                                                                                                                                                                      |
| 13 | Key results              | 18 | Summarise key results with reference to study objectives <a href="#">PAGE 16</a>                                                                                                                                                                     |
| 14 | Limitations              | 19 | Discuss limitations of the study, taking into account sources of potential bias or imprecision. Discuss both direction and magnitude of any potential bias <a href="#">PAGE 17</a>                                                                   |
| 15 |                          |    |                                                                                                                                                                                                                                                      |
| 16 |                          |    |                                                                                                                                                                                                                                                      |
| 17 | Interpretation           | 20 | Give a cautious overall interpretation of results considering objectives, limitations, multiplicity of analyses, results from similar studies, and other relevant evidence <a href="#">PAGE 16, 17</a>                                               |
| 18 |                          |    |                                                                                                                                                                                                                                                      |
| 19 |                          |    |                                                                                                                                                                                                                                                      |
| 20 |                          |    |                                                                                                                                                                                                                                                      |
| 21 | Generalisability         | 21 | Discuss the generalisability (external validity) of the study results <a href="#">PAGE 16, 17</a>                                                                                                                                                    |
| 22 |                          |    |                                                                                                                                                                                                                                                      |
| 23 | <b>Other information</b> |    |                                                                                                                                                                                                                                                      |
| 24 | Funding                  | 22 | Give the source of funding and the role of the funders for the present study and, if applicable, for the original study on which the present article is based <a href="#">PAGE 19</a>                                                                |
| 25 |                          |    |                                                                                                                                                                                                                                                      |

\*Give information separately for exposed and unexposed groups.

**Note:** An Explanation and Elaboration article discusses each checklist item and gives methodological background and published examples of transparent reporting. The STROBE checklist is best used in conjunction with this article (freely available on the Web sites of PLoS Medicine at <http://www.plosmedicine.org/>, Annals of Internal Medicine at <http://www.annals.org/>, and Epidemiology at <http://www.epidem.com/>). Information on the STROBE Initiative is available at <http://www.strobe-statement.org>.



# BMJ Open

## Healthcare resource utilisation and costs of hospitalisation and primary care among adults with COVID-19 in England: a population-based cohort study

|                                 |                                                                                                                                                                                                                                                                                                                                                                                                                                                                                                                                                                         |
|---------------------------------|-------------------------------------------------------------------------------------------------------------------------------------------------------------------------------------------------------------------------------------------------------------------------------------------------------------------------------------------------------------------------------------------------------------------------------------------------------------------------------------------------------------------------------------------------------------------------|
| Journal:                        | <i>BMJ Open</i>                                                                                                                                                                                                                                                                                                                                                                                                                                                                                                                                                         |
| Manuscript ID                   | bmjopen-2023-075495.R1                                                                                                                                                                                                                                                                                                                                                                                                                                                                                                                                                  |
| Article Type:                   | Original research                                                                                                                                                                                                                                                                                                                                                                                                                                                                                                                                                       |
| Date Submitted by the Author:   | 09-Nov-2023                                                                                                                                                                                                                                                                                                                                                                                                                                                                                                                                                             |
| Complete List of Authors:       | Yang, Jingyan; Pfizer Inc; Columbia University<br>Andersen, Kathleen; Pfizer Inc,<br>Rai, Kiran; Adelphi Real World<br>Tritton, Theo; Adelphi Real World<br>Mugwagwa, Tendai; Pfizer Inc<br>Reimbaeva, Maya; Pfizer Inc<br>Tsang, Carmen; Pfizer Ltd<br>McGrath, Leah; Pfizer Inc<br>Payne, Poppy; Adelphi Real World<br>Backhouse, Bethany; Adelphi Real World,<br>Mendes, Diana; Pfizer Ltd, Health & Value<br>Butfield, Rebecca; Pfizer Ltd<br>Naicker, Kevin; Pfizer Ltd<br>Araghi, Mary; Pfizer Ltd<br>Wood, R; Adelphi Real World<br>Nguyen, Jennifer; Pfizer Inc |
| <b>Primary Subject Heading</b>: | Infectious diseases                                                                                                                                                                                                                                                                                                                                                                                                                                                                                                                                                     |
| Secondary Subject Heading:      | Health economics                                                                                                                                                                                                                                                                                                                                                                                                                                                                                                                                                        |
| Keywords:                       | COVID-19, Primary Health Care, Retrospective Studies, Hospitalization                                                                                                                                                                                                                                                                                                                                                                                                                                                                                                   |
|                                 |                                                                                                                                                                                                                                                                                                                                                                                                                                                                                                                                                                         |

SCHOLARONE™  
Manuscripts



I, the Submitting Author has the right to grant and does grant on behalf of all authors of the Work (as defined in the below author licence), an exclusive licence and/or a non-exclusive licence for contributions from authors who are: i) UK Crown employees; ii) where BMJ has agreed a CC-BY licence shall apply, and/or iii) in accordance with the terms applicable for US Federal Government officers or employees acting as part of their official duties; on a worldwide, perpetual, irrevocable, royalty-free basis to BMJ Publishing Group Ltd ("BMJ") its licensees and where the relevant Journal is co-owned by BMJ to the co-owners of the Journal, to publish the Work in this journal and any other BMJ products and to exploit all rights, as set out in our [licence](#).

The Submitting Author accepts and understands that any supply made under these terms is made by BMJ to the Submitting Author unless you are acting as an employee on behalf of your employer or a postgraduate student of an affiliated institution which is paying any applicable article publishing charge ("APC") for Open Access articles. Where the Submitting Author wishes to make the Work available on an Open Access basis (and intends to pay the relevant APC), the terms of reuse of such Open Access shall be governed by a Creative Commons licence – details of these licences and which [Creative Commons](#) licence will apply to this Work are set out in our licence referred to above.

Other than as permitted in any relevant BMJ Author's Self Archiving Policies, I confirm this Work has not been accepted for publication elsewhere, is not being considered for publication elsewhere and does not duplicate material already published. I confirm all authors consent to publication of this Work and authorise the granting of this licence.

1  
2  
3 **Healthcare resource utilisation and costs of hospitalisation and primary care**  
4 **among adults with COVID-19 in England: a population-based cohort study**  
5  
6  
7

8 Authors: Jingyan Yang<sup>1,2</sup>, Kathleen M. Andersen<sup>1</sup>, Kiran K. Rai<sup>3</sup>, Theo Tritton<sup>3</sup>, Tendai Mugwagwa<sup>4</sup>,  
9 Maya Reimbaeva<sup>1</sup>, Carmen Tsang<sup>4</sup>, Leah J. McGrath<sup>1</sup>, Poppy Payne<sup>3</sup>, Bethany Backhouse<sup>3</sup>, Diana  
10 Mendes<sup>4</sup>, Rebecca Butfield<sup>4</sup>, Kevin Naicker<sup>4</sup>, Marzieh Araghi<sup>4</sup>, Robert Wood<sup>3</sup>, Jennifer L. Nguyen<sup>1</sup>  
11  
12  
13

14 Affiliations:

15  
16  
17 <sup>1</sup> Pfizer Inc., New York, United States.

18 <sup>2</sup> Institute for Social and Economic Research and Policy, Columbia University, New York, NY, USA

19 <sup>3</sup> Adelphi Real World, Bollington, United Kingdom.

20 <sup>4</sup> Pfizer Ltd, Tadworth, United Kingdom.  
21  
22  
23

24  
25 **Corresponding Author:**

26  
27  
28 Jingyan Yang, DrPH MHS

29  
30 [Jingyan.Yang@pfizer.com](mailto:Jingyan.Yang@pfizer.com)

31 Global Value and Access,

32 Pfizer Inc.

33 66 Hudson Blvd E

34 New York, NY 10001

35 USA  
36  
37  
38  
39

40 **Running Title:**

41  
42 HCRU and Costs of COVID-19 in England  
43  
44

45 **Target Journal:**

46  
47 BMJ  
48  
49

50 **Word count:** 4,304  
51

52  
53 **Figures / Tables:** 5  
54  
55  
56  
57  
58  
59  
60

## ABSTRACT

**Objectives** To quantify direct costs and healthcare resource utilisation (HCRU) associated with acute COVID-19 in adults in England.

**Design** Population-based retrospective cohort study, using Clinical Practice Research Datalink Aurum primary care electronic medical records linked to Hospital Episode Statistics secondary care administrative data.

**Setting** Patients registered to primary care practices in England.

**Population** 1,706,368 adults with a positive SARS-CoV-2 PCR or antigen test from August 2020 to January 2022 were included; 13,105 within the hospitalised cohort indexed between August 2020 and March 2021, and 1,693,263 within the primary care cohort indexed between August 2020 and January 2022. Patients with a COVID-19 related hospitalisation within 84 days of a positive test were included in the hospitalised cohort.

**Main outcome measures** Primary and secondary care HCRU and associated costs  $\leq 4$  weeks following positive COVID-19 test, stratified by age group, risk of severe COVID-19 and immunocompromised status.

**Results** Among the hospitalised cohort, average length of stay, including critical care stays, was longer in older adults. Median healthcare cost per hospitalisation was higher in those aged 75-84 (£8,942) and  $\geq 85$  years (£8,835) than in those aged  $< 50$  years (£7,703). Whilst few (6.0%) patients in critical care required mechanical ventilation, its use was higher in older adults (50-74 years: 8.3%;  $< 50$  years: 4.3%). HCRU and associated costs were often greater in those at higher risk of severe COVID-19 than in the overall cohort, although minimal differences in HCRU were found across the three different high-risk definitions. Among the primary care cohort, GP or nurse consultations were more frequent among older adults and the immunocompromised.

**Conclusions** COVID-19 related hospitalisations in older adults, particularly critical care stays, were the primary drivers of high COVID-19 resource use in England. These findings may inform health policy decisions and resource allocation in the prevention and management of COVID-19.

**Keywords:** COVID-19; United Kingdom; healthcare resource utilisation; primary health care; secondary health care; costs.

### STRENGTHS AND LIMITATIONS OF THIS STUDY

- To the best of our knowledge, this is the first study to assess healthcare resource utilisation (HCRU) and costs associated with COVID-19, separately, in the primary and secondary care settings within England.
- Our results may inform resource allocation across care settings to optimize COVID-19 management.
- Hospitalisation status is unknown for patients after April 2021; therefore, secondary care HCRU and costs during the omicron predominance period were not described.
- Due to data latency accident and emergency and outpatient attendances were not assessed.

For peer review only

## INTRODUCTION

Coronavirus disease 2019 (COVID-19) is a highly infectious respiratory illness caused by the severe acute respiratory syndrome-coronavirus-2 virus (SARS-CoV-2). Globally, ~670 million cases and ~6.9 million deaths related to COVID-19 have been recorded as of 9<sup>th</sup> March 2023.(1) Within England, as of 1<sup>st</sup> March 2023 there have been approximately 20.5 million cases, 982,000 hospitalisations and 186,000 associated deaths.(2) The clinical presentation of COVID-19 ranges from asymptomatic to critical illness, where mild or uncomplicated illness is commonly managed in primary care and severe COVID-19 managed in the hospital setting.(3, 4) Whilst the majority experience few symptoms or mild to moderate COVID-19, some patients require medical intervention, including respiratory support and intensive care admission.(5) The risk of worse outcomes, e.g. hospitalisation and death, is greater for older adults, smokers, those who are obese, have a compromised immune system, and/or have certain comorbidities such as hypertension and lung disease.(6, 7) As such, the Joint Committee on Vaccination and Immunisation (JCVI) recommended the prioritisation of COVID-19 vaccination in specific groups (based on age, those clinically extremely vulnerable, underlying health conditions, pregnancy and working in health and social care).(8)

Whilst the vaccination roll-out has substantially reduced COVID-19 associated morbidity and mortality, COVID-19 remains a significant burden on the UK healthcare system. According to a report published by the UK's Department of Health and Social Care (DHSC) assessing the impacts during the Omicron wave in England, COVID-19 has led to longer waits for elective and emergency visits in the secondary care setting, and across the pandemic COVID-19 has reduced or delayed appointments and referrals in primary care, potentially resulting in a worsened state of health for some primary care patients .(9)

In addition to the health impact of COVID-19, several studies in the United States (US) have quantified the economic burden of COVID-19 related hospitalisations,(10-12) and have reported higher costs among those with health complications. Studies quantifying the economic burden of COVID-19 in the UK are scarce; of the 37 studies identified within a systematic review quantifying the economic impact of COVID-19, five focused on UK-based data, of which two assessed direct healthcare burden attributed to patient care, three assessed the macroeconomic impact of the epidemic and its associated policies and two assessed the costs associated with COVID-19.(13) Only two studies reported use of electronic health records, with no studies reporting the use of general practitioner (GP) appointments data. Keogh-Brown *et al.* report that the impact of COVID-19 on the UK economy was approximately a loss of £40 billion in 2020.(14) However, much of these costs were related to reduced labour (~£39 billion), and whilst overall hospital and intensive care costs were estimated (~£1 billion), these focused on the health-related economic impact on to the UK economy, rather than individual-level costs to the NHS to manage patients with COVID-19. Furthermore, to our knowledge, no studies have reported direct medical costs within the primary care setting. By addressing these data gaps within the literature, we will provide valuable evidence to support health policy decisions on public health interventions and healthcare resource allocation in the prevention and management of COVID-19.

### **Aims and objectives:**

This study aimed to quantify healthcare resource utilisation (HCRU) and costs associated with COVID-19 in adults in England, by age and according to risk of severe COVID-19 and immunocompromised status, separately for those with and without hospitalisation records, using UK primary care data, linked to secondary care data when available.

## METHODS:

### Study design and setting

We conducted a population-based retrospective cohort study using data obtained from the Clinical Practice Research Datalink (CPRD) Aurum primary care database(15) and, when available, linked secondary care data (Hospital Episode Statistics Admitted Patient Care dataset, HES APC).(16) The May 2022 release of CPRD Aurum was used; the latest data from CPRD Aurum covers the period January 1995 to April 2022,(17, 18) while HES APC covers April 1997 to March 2021.(16) The study design and methods have been described elsewhere.(19) A study design schematic is provided in Supplementary eFigure 1.

Two distinct patient cohorts were created to describe the economic burden of the acute phase of COVID-19 ( $\leq 4$  weeks following positive test) among adults in the UK:

1. **Hospitalised cohort:** Patients who had a positive SARS-CoV-2 polymerase chain reaction (PCR) or antigen test, or a recorded clinical diagnosis of COVID-19, in their GP record between 1 August 2020 and 31 March 2021 and had a COVID-19 related hospitalisation within 84 days after their positive test result. The index period start date was chosen to align with when it became mandatory for National Health Service (NHS) Test and Trace to report positive PCR test results to the patient's general practitioner (GP) practice, from 20<sup>th</sup> July 2020 onwards;(20) the end date was determined by the end of data availability within HES APC. Patients in this cohort may have also received COVID-19 care outside of the hospital setting e.g. primary care consultations.
2. **Primary care cohort:** Patients who had a positive SARS-CoV-2 PCR or antigen test, or a recorded clinical diagnosis of COVID-19, in their GP record. For persons diagnosed between 1 August 2020 and 31 March 2021, they were included in this cohort if they did not have a record for a COVID-19 related hospitalisation within 84 days of their positive test result. All persons diagnosed with COVID-19 on or after 1 April 2021 were included in this cohort, as this was a period of time for which CPRD did not have hospitalisation data available. The index period end date, January 2022, was determined by the overall cohort design.(19)

### Population

Patients aged  $\geq 18$  years were included in this study. Further details on the eligibility criteria are cited elsewhere.(19) In brief, this study included patients that had: 1) a confirmed COVID-19 episode recorded in CPRD Aurum, where the first date of COVID-19 diagnosis (i.e., index date) was observed in the index period, 2) a minimum registration period of 12 months at their current GP practice prior to the index date, 3) data considered of acceptable research quality as defined by CPRD,(21) and 4) eligible for linkage to HES. Patients were excluded if they had a record for a COVID-19 related hospitalisation or death prior to their GP-recorded date of COVID-19 diagnosis. COVID-19 episodes starting prior to August 2020, from which point capture of COVID-19 test results within GP patient records was considered nearly complete, were not included in the study.

### Demographic and clinical characteristics

Sociodemographic characteristics at index included: age, sex, region of GP practice, ethnicity (using patient history), social deprivation (measured using the Index of Multiple Deprivation (IMD) 2019 score), smoking status (using patient history) and body mass index (BMI) within two years of the index date. Clinical characteristics included Quan-Charlson Comorbidity Index (CCI) 2005(22) within two years of index, and vaccination status according to immunocompromised status at index.

Vaccination status at index for immunocompetent patients was defined according to whether they had received 0 doses (unvaccinated), 1 primary dose, 2 primary doses, or any booster dose. For immunocompromised patients, vaccination status was defined according to whether they had received 0 doses (unvaccinated), 1 primary dose, 2 primary doses, 3 primary doses, or any booster dose. A patient was considered vaccinated starting from 14 days after dose receipt, and doses were required to be separated by at least 21 days. Disease severity among the hospitalised cohort was assessed using the Ordinal Scale for Clinical Improvement within WHO's COVID-19 Therapeutic Trial Synopsis,(23) based on the highest level of care received during the hospitalisation following mutually exclusive categories: 1) hospitalised, no oxygen therapy; 2) oxygen by mask or nasal prongs; 3) non-invasive ventilation or high-flow oxygen; 4) intubation and mechanical ventilation and 5) ventilation and additional organ support. Further details on definitions, and operationalisation of code lists are described elsewhere.(19)

## Outcomes and follow-up

### *Healthcare resource utilisation (HCRU)*

All COVID-19 related HCRU and associated costs to the NHS in the four weeks including and following the index date were calculated and reported for the following elements of HCRU:

**Medication use:** Medications that were prescribed within primary care were considered to be COVID-19 related when prescribed on the same day as a COVID-19 diagnosis (see Supplementary eTable 1).(24, 25)

**Primary care consultations:** GP or nurse consultations with a diagnostic code of COVID-19 were reported separately for face-to-face (F2F) and telephone consultations. This was defined as a maximum of one visit of each format per person per day, and any additional visits were considered as data capture errors.

**Hospitalisations:** Hospital admissions with a COVID-19 primary diagnosis were assessed within the hospitalised cohort. Additionally, the mean (standard deviation) and median (interquartile range) length of stay (LoS) per admission was assessed and reported separately for time spent in hospital from admission to discharge as well as time spent in high dependency/intensive care units (HDUs/ICUs). Whether mechanical ventilation treatment was received was also reported. In the event of multiple hospitalisations (or for critical care, HDU/ICU stays) during the acute COVID-19 phase, the average LoS per person, rather than the cumulative total, was used.

**Direct healthcare costs:** Costs were described for patients with one or more event of a given type only, i.e. resource users, and persons without utilisation were not included in the distributions of costs presented. The estimation of costs associated with hospitalisations was based on the National Schedule of NHS Costs (2020/2021) which report costs of admitted patient care by Healthcare Resource Group (HRG) in England.(26) In order to estimate the cost per hospitalisation, all finished consultant episodes (FCEs: the time a patient spends in the care of one consultant within their hospitalisation) within one admission were accounted to derive the total spell (hospitalisation) cost.(27) In the event that a given person had multiple hospitalisations during the acute phase, cost per day estimates were obtained by dividing total hospitalisation costs by total LoS per-patient.

Primary care consultations (including GP or nurse visits) were costed using information compiled and provided by the Personal Social Services Research Unit (PSSRU).(28) The direct healthcare cost for each prescription written in primary care was calculated via the application of cost per unit from the NHS Drug Tariff.(29)



## Statistical analysis

This descriptive study included all patients who met the study eligibility criteria. This study did not involve hypothesis testing; therefore, formal sample size calculations were not performed. Means and standard deviation (SD), or median and lower and upper quartile (Q1, Q3) were calculated for numeric variables, with frequency counts and percentages presented for categorical variables. Per the design of the study, all results were presented separately for the hospitalised cohort and primary care cohorts.

## Stratifying variables

All outcomes were evaluated by age, high risk status, and immunocompromised status, as previous studies have shown that healthcare utilisation can differ by age and clinical status.<sup>(30, 31)</sup> Age group categories were based on the COVID-19 vaccination rollout strategy in the UK: 18 – 49; 50 – 64; 65 – 74; 75 – 84; and 85+. Three separate definitions were used to define persons at greater risk of severe COVID-19: 1) the McInnes Advisory Group highest risk group (a list of conditions to identify persons at the very highest risk of COVID hospitalisation and death, as defined by an advisory group chaired by Prof Iain McInnes and supported by the NHS England RAPID-C19 team (the McInnes Advisory Group)),<sup>(32)</sup> 2) eligibility for the PANORAMIC study (a randomised trial of antiviral therapeutic agents including patients who were deemed at a higher risk of hospitalisation and death (PANORAMIC))<sup>(33)</sup> and 3) the UK Health Security Agency (UKHSA) clinical groups, outlined in COVID-19: the Green Book, chapter 14a (JCVI's COVID-19 vaccination prioritisation criteria) (the Green Book).<sup>(8)</sup> The code lists for each high risk definition were developed using reproducible search terms with multiple reviewers, have been previously described and published.<sup>(19)</sup> For immune system status, patients were classified as immunocompromised at the time of receipt of first COVID-19 vaccine dose if they had one or more codes meeting Davidson *et al.*'s definition of immunocompromised status.<sup>(34)</sup> All analyses were conducted in SAS version 9.4 (SAS Institute, Cary, North Carolina).

## Patient and Public Involvement

There was no direct involvement of patients and public in this study. However, we aim to disseminate the findings through appropriate channels.

## RESULTS:

### Patient sociodemographic and clinical characteristics

A total of 1,706,368 adult COVID-19 cases were included in this study. Of the 471,128 patients diagnosed between 1<sup>st</sup> August 2020 and 31<sup>st</sup> March 2021, 13,105 (2.8%) patients were included in the hospitalised cohort; 1,693,263 were included in the primary care cohort. **Table 1** summarises the baseline patient characteristics across the hospitalised and primary care cohorts.

Among the hospitalised cohort, the majority (n=9,978; 76.1%) of patients were aged ≥50 years (mean age [SD]: 60.7 [16] years), more than half (n=7,504; 57.3%) were male, 66.9% were of white ethnic origin, and 46.6% (n=6,102) lived in areas with greatest deprivation (IMD quintiles 4 and 5).

Of those with known smoking status, 56.7% (n=5,500) had a history of smoking. Over half (n=6,974; 53.2%) were overweight or obese according to BMI, and among those with a BMI record, this increased to 84.8%. Over half of patients (n=7,078; 54.0%) had a CCI score of 0. The majority (98.6%) of the hospitalised cohort were defined as immunocompetent in baseline, of whom 98.1% were unvaccinated at index (n=12,684; 98.1%).

1  
2  
3 The proportions of patients meeting the McInnes Advisory Group, PANORAMIC and the Green Book  
4 definitions, respectively were 33.0% (n=4,323), 84.0% (n=11,011) and 40.8% (n=5,341). Most (73.3%)  
5 patients did not receive oxygen therapy during their hospitalisation, and few patients (n=847; 6.5%)  
6 received intubation or ventilation support.  
7

8 Sociodemographic characteristics of the primary care cohort differed numerically from the  
9 hospitalised cohort: the majority (n=1,161,843; 68.6%) of patients were aged <50 years (mean age  
10 [SD]: 42.3 [15.8] years), more than half (n=928,546; 54.8%) were female, and patients were  
11 relatively evenly spread across socioeconomic quintiles. However, the distribution across ethnicity  
12 groups was similar to the hospitalised cohort.  
13  
14

15 When considering the clinical characteristics, among those with known smoking status 52.0% had a  
16 smoking history, and 24.4% were overweight or obese (n=414,037). Most patients (n=1,462,791;  
17 86.4%) had a CCI score of 0. Unlike the hospitalised cohort, vaccination status was more varied;  
18 among the 1,629,716 (96.2%) immunocompetent patients in the primary care cohort, 40.5% were  
19 unvaccinated.  
20  
21

22 Relatively fewer patients than in the hospitalised cohort were at risk of severe COVID-19 across all  
23 three definitions (McInnes Advisory Group: n=250,329, 14.8%; PANORAMIC: n=691,593, 40.8% and  
24 the Green Book: n=212,556, 12.6%).  
25  
26  
27  
28  
29  
30  
31  
32  
33  
34  
35  
36  
37  
38  
39  
40  
41  
42  
43  
44  
45  
46  
47  
48  
49  
50  
51  
52  
53  
54  
55  
56  
57  
58  
59  
60

**Table 1: Demographic and clinical characteristics of the study population at baseline**

| Characteristics                               | Hospitalised cohort<br>(n=13,105)<br>n (%) | Primary care cohort (n=1,693,263)<br>n (%) |
|-----------------------------------------------|--------------------------------------------|--------------------------------------------|
| <b>Age, years</b>                             |                                            |                                            |
| Mean (SD)                                     | 60.7 (16.0)                                | 42.3 (15.8)                                |
| 18-49                                         | 3,127 (23.9%)                              | 1,161,843 (68.6%)                          |
| 50-64                                         | 4,844 (37.0%)                              | 379,528 (22.4%)                            |
| 65-74                                         | 2,386 (18.2%)                              | 92,573 (5.5%)                              |
| 75-84                                         | 1,690 (12.9%)                              | 40,481 (2.4%)                              |
| ≥85                                           | 1,058 (8.1%)                               | 18,838 (1.1%)                              |
| <b>Sex</b>                                    |                                            |                                            |
| Male                                          | 7,504 (57.3%)                              | 764,687 (45.2%)                            |
| Female                                        | 5,601 (42.7%)                              | 928,546 (54.8%)                            |
| Unknown                                       | 0                                          | 30 (<0.1%)                                 |
| <b>GP practice region</b>                     |                                            |                                            |
| North East                                    | 465 (3.6%)                                 | 65,755 (3.9%)                              |
| North West                                    | 2,872 (21.9%)                              | 363,770 (21.5%)                            |
| Yorkshire and The Humber                      | 339 (2.6%)                                 | 53,777 (3.2%)                              |
| East Midlands                                 | 213 (1.6%)                                 | 38,663 (2.3%)                              |
| West Midlands                                 | 2,057 (15.7%)                              | 278,170 (16.4%)                            |
| East of England                               | 413 (3.2%)                                 | 66,446 (3.9%)                              |
| London                                        | 2,965 (22.6%)                              | 335,233 (19.8%)                            |
| South East                                    | 2,670 (20.4%)                              | 317,898 (18.8%)                            |
| South West                                    | 1,111 (8.5%)                               | 173,317 (10.2%)                            |
| Unknown                                       | 0                                          | 234 (<0.1%)                                |
| <b>Ethnicity</b>                              |                                            |                                            |
| White                                         | 8,769 (66.9%)                              | 1,106,974 (65.4%)                          |
| Black                                         | 467 (3.6%)                                 | 45,177 (2.7%)                              |
| Asian                                         | 1,651 (12.6%)                              | 108,603 (6.4%)                             |
| Mixed                                         | 108 (0.8%)                                 | 17,757 (1.1%)                              |
| Other                                         | 329 (2.5%)                                 | 34,726 (2.1%)                              |
| Unknown                                       | 1,781 (13.6%)                              | 380,026 (22.4%)                            |
| <b>Index of Multiple Deprivation (2019)</b>   |                                            |                                            |
| Quintile 1 (least deprived)                   | 2,166 (16.5%)                              | 335,374 (19.8%)                            |
| Quintile 2                                    | 2,342 (17.9%)                              | 336,418 (19.9%)                            |
| Quintile 3                                    | 2,488 (19.0%)                              | 325,643 (19.2%)                            |
| Quintile 4                                    | 2,881 (22.0%)                              | 353,803 (20.1%)                            |
| Quintile 5 (most deprived)                    | 3,221 (24.6%)                              | 340,894 (20.1%)                            |
| Unknown                                       | 7 (<0.1%)                                  | 1,131 (0.1%)                               |
| <b>Smoking</b>                                |                                            |                                            |
| Current smoker                                | 1,690 (12.9%)                              | 293,016 (17.3%)                            |
| Ex-smoker                                     | 3,810 (29.1%)                              | 283,693 (16.8%)                            |
| Never smoked                                  | 4,196 (32.0%)                              | 532,804 (31.5%)                            |
| Unknown                                       | 3,409 (26.0%)                              | 583,750 (34.5%)                            |
| <b>BMI</b>                                    |                                            |                                            |
| Underweight                                   | 94 (0.7%)                                  | 13,657 (0.8%)                              |
| Normal                                        | 1,154 (8.8%)                               | 201,500 (11.9%)                            |
| Overweight                                    | 2,388 (18.2%)                              | 198,235 (11.7%)                            |
| Obese                                         | 4,586 (35.0%)                              | 215,802 (12.7%)                            |
| Unknown                                       | 4,883 (37.3%)                              | 1,064,069 (62.8%)                          |
| <b>Quan Charlson Comorbidity Index (2005)</b> |                                            |                                            |
| Mean (SD)                                     | 1.0 (1.7)                                  | 0.2 (0.7)                                  |
| 0                                             | 7,078 (54.0%)                              | 1,462,791 (86.4%)                          |
| 1-2                                           | 4,232 (32.3%)                              | 197,557 (11.7%)                            |
| 3-4                                           | 1,160 (8.9%)                               | 24,240 (1.4%)                              |
| ≥5                                            | 635 (4.9%)                                 | 8,675 (0.5%)                               |
| <b>Immunocompromised status</b>               |                                            |                                            |
| Immunocompetent                               | 12,924 (98.6%)                             | 1,629,716 (96.2%)                          |
| Immunocompromised                             | 181 (1.4%)                                 | 63,547 (3.8%)                              |
| <b>Vaccination status: immunocompetent</b>    |                                            |                                            |
| Unvaccinated                                  | 12,684 (98.1%)                             | 660,610 (40.5%)                            |
| 1 dose                                        | 240 (1.9%)                                 | 125,129 (7.7%)                             |
| 2 doses                                       | 0                                          | 593,557 (36.4%)                            |
| First booster dose                            | 0                                          | 250,420 (15.4%)                            |
| <b>Vaccination status: immunocompromised</b>  |                                            |                                            |

|                                              |                |                 |
|----------------------------------------------|----------------|-----------------|
| Unvaccinated                                 | 102 (56.4%)    | 1,154 (1.8%)    |
| 1 dose                                       | 79 (43.7%)     | 5,314 (8.4%)    |
| 2 doses                                      | 0              | 33,731 (53.1%)  |
| 3 doses                                      | 0              | 23,082 (36.3%)  |
| First booster dose                           | 0              | 266 (0.4%)      |
| <b>Risk of severe COVID-19</b>               |                |                 |
| McInnes Advisory Group                       | 4,323 (33.0%)  | 250,329 (14.8%) |
| PANORAMIC                                    | 11,011 (84.0%) | 691,593 (40.8%) |
| Green Book                                   | 5,341 (40.8%)  | 212,556 (12.6%) |
| <b>COVID-19 severity<sup>a</sup></b>         |                |                 |
| No oxygen therapy                            | 9,606 (73.3%)  | -               |
| Low-flow oxygen                              | 793 (6.1%)     | -               |
| Non-invasive ventilation or high-flow oxygen | 1,859 (14.2%)  | -               |
| Intubation/mechanical ventilation            | 822 (6.3%)     | -               |
| Ventilation and additional organ support     | 25 (0.2%)      | -               |

<sup>a</sup> Highest level of severity experienced during the hospitalisation.

For peer review only

## Healthcare resource utilisation (HCRU) and associated costs

### *Hospitalised cohort*

The median total spell length of stay (LoS), including both general ward as well as critical care admission, was 6.0 days. The LoS was longer for older patients; median length of stay was 5.0 days for those aged 18 – 49 years, 6.0 days for age 50 – 64 years, and 8.0 days for age  $\geq 65$  years (**Table 2**). When stratified by risk of severe COVID-19, LoS was similar across definitions (median 7.0 days [Q1: 4.0, Q3: 12.0]). The median LoS was one day longer in immunocompromised patients (7.0 [4.0, 12.0]) compared to those immunocompetent (6.0 [4.0, 12.0]) (see Supplementary materials eTable 2 for full details).

Of the 13,105 hospitalised patients, 1,934 (14.8%) were admitted to critical care. The median LoS in critical care was 8.0 days. The proportion requiring critical care, as well as LoS, was greatest among the aged 50-64 and 65-74 groups. Critical care LoS was similar for persons meeting each risk definitions as well as by immunocompromised status when compared to the overall cohort.

Median healthcare cost per hospitalisation was lower in those aged 18 – 49 years (£7,703) than in those aged 75 – 84 years (£8,942) and  $\geq 85$  years (£8,835), and was similar across the risk definitions (£8,727) and immunocompromised status (£8,727 in the immunocompromised and immunocompetent groups) (see Supplementary materials eTable 3 for full details). The median non-critical care costs followed similar patterns, whereas median observed critical care costs were higher among immunocompetent patients (£17,439) than among immunocompromised patients (£14,551). The mean number of FCEs per hospitalisation was 2.0, with FCEs ranging between 1-7 for immunocompromised patients and 1-16 patients for immunocompetent patients (data not shown in tables).

Median costs of critical care requiring mechanical ventilation (MV) was broadly similar across all stratifications. Overall, the proportion of hospitalised patients who received MV was low ( $n=792$ ; 6.0%) and increased with age (4.3%, for ages 18 – 49, 8.2% for ages 50 – 64 and 8.6% for ages 65 – 74 years), but decreased after age 74. MV use varied slightly across the risk definitions, with the highest use in the PANORAMIC group (6.5%), and lowest in the Green Book group (5.2%). Among people who received MV, the median length of ventilation was 1.0 day; this did not differ across stratifications (see Supplementary materials eTable 2).

Telephone consultations with a GP or nurse ( $n=5,077$ ; 38.7%) were more common than F2F consultations ( $n=2,489$ ; 19.0%) (Supplementary materials: eTable 4). Telephone visits remained the main mode of consultation when stratified by age and risk definition, particularly for older adults, people at high risk of severe COVID-19 and immunocompromised patients. When assessing COVID-19 associated medication use, only 29 (0.2%) patients received a primary care prescription from their GP to manage or treat COVID-19 (Supplementary materials eTable 4). See Supplementary materials eTable 5 for primary care costs.

**Table 2: HCRU in the four weeks after index stratified by age, risk of severe COVID-19 and immunocompromised status at baseline among the hospitalised cohort**

| HCRU                                     | Age stratifications |                 |                 |                 |                 |                 | Risk criteria         | Immunocompromised status at baseline |
|------------------------------------------|---------------------|-----------------|-----------------|-----------------|-----------------|-----------------|-----------------------|--------------------------------------|
|                                          | All (n=13,105)      | 18-49 (n=3,127) | 50-64 (n=4,844) | 65-74 (n=2,386) | 75-84 (n=1,690) | ≥85 (n=1,058)   | Green Book (n= 5,341) | Immunocompromised (n=181)            |
| <b>Length of hospital stay (in days)</b> |                     |                 |                 |                 |                 |                 |                       |                                      |
| Mean (SD)                                | 9.2 (10.0)          | 6.4 (8.1)       | 9.0 (10.1)      | 10.8 (10.9)     | 11.2 (10.2)     | 11.4 (9.7)      | 10.0 (9.8)            | 9.0 (6.7)                            |
| Median (Q1, Q3)                          | 6.0 (4.0, 11.0)     | 5.0 (2.0, 7.0)  | 6.0 (4.0, 10.0) | 8.0 (5.0, 13.0) | 8.0 (5.0, 14.0) | 8.0 (5.0, 15.0) | 7.0 (4.0, 12.0)       | 7.0 (4.5, 12.0)                      |
| <b>Critical care admission</b>           |                     |                 |                 |                 |                 |                 |                       |                                      |
| n (%)                                    | 1,934 (14.8%)       | 399 (12.8%)     | 896 (18.5%)     | 456 (19.1%)     | 165 (9.8%)      | 18 (1.7%)       | 695 (13.0%)           | 10 (5.5%)                            |
| <b>Length of stay in critical care</b>   |                     |                 |                 |                 |                 |                 |                       |                                      |
| Mean (SD)                                | 11.5 (11.2)         | 9.7 (10.9)      | 12.3 (11.8)     | 12.3 (11.1)     | 10.0 (8.9)      | 5.3 (5.6)       | 11.2 (10.6)           | 9.0 (5.8)                            |
| Median (Q1, Q3)                          | 8.0 (4.0, 15.0)     | 6.0 (4.0, 11.0) | 8.5 (5.0, 16.0) | 9.0 (5.0, 15.0) | 8.0 (4.0, 14.0) | 4.0 (1.0, 7.0)  | 8.0 (5.0, 14.0)       | 8.5 (4.0, 13.0)                      |
| <b>Mechanical ventilation</b>            |                     |                 |                 |                 |                 |                 |                       |                                      |
| n (%)                                    | 792 (6.0%)          | 135 (4.3%)      | 398 (8.2%)      | 204 (8.6%)      | 55 (3.3%)       | 0               | 278 (5.2%)            | <5                                   |
| <b>Mechanical ventilation days</b>       |                     |                 |                 |                 |                 |                 |                       |                                      |
| Mean (SD)                                | 1.2 (0.5)           | 1.2 (0.4)       | 1.2 (0.4)       | 1.2 (0.5)       | 1.1 (0.4)       | 0               | 1.2 (0.4)             | N/A*                                 |
| Median (Q1, Q3)                          | 1.0 (1.0, 1.0)      | 1.0 (1.0, 1.0)  | 1.0 (1.0, 1.0)  | 1.0 (1.0, 1.0)  | 1.0 (1.0, 1.0)  | 0               | 1.0 (1.0, 1.0)        | N/A*                                 |

**Table 3: Costs in the four weeks after index stratified by age, risk of severe COVID-19 and immunocompromised status at baseline among the hospitalised cohort**

| Costs                                                                        | Age stratifications     |                         |                         |                         |                         |                       | Risk criteria            | Immunocompromised status at baseline |
|------------------------------------------------------------------------------|-------------------------|-------------------------|-------------------------|-------------------------|-------------------------|-----------------------|--------------------------|--------------------------------------|
|                                                                              | All<br>(n= 13,105)      | 18-49<br>(n= 3,127)     | 50-64<br>(n= 4,844)     | 65-74<br>(n= 2,386)     | 75-84<br>(n= 1,690)     | ≥85<br>(n=1,058)      | Green Book<br>(n= 5,341) | Immunocompromised<br>(n=181)         |
| <b>Healthcare cost per hospitalisation (£)</b>                               |                         |                         |                         |                         |                         |                       |                          |                                      |
| Mean (SD)                                                                    | 13,059 (18,659)         | 10,215 (16,242)         | 14,396 (21,874)         | 15,655 (20,965)         | 12,500 (12,409)         | 10,365 (6,773)        | 13,009 (16,509)          | 10,814 (8,525)                       |
| Median (Q1, Q3)                                                              | 8,727 (4,364, 13,091)   | 7,703 (2,994, 11,600)   | 8,727 (4,364, 14,317)   | 8,727 (4,471, 17,399)   | 8,942 (5,800, 13,413)   | 8,835 (5,800, 13,091) | 8,727 (4,471, 13,413)    | 8,727 (5,800, 13,063)                |
| <b>Healthcare cost of non-critical care admission (£)</b>                    |                         |                         |                         |                         |                         |                       |                          |                                      |
| Mean (SD)                                                                    | 9,360 (7,275)           | 7,516 (6,294)           | 9,199 (7,028)           | 10,366 (7,990)          | 10,898 (7,787)          | 10,876 (7,308)        | 10,041 (7,536)           | 10,283 (6,511)                       |
| Median (Q1, Q3)                                                              | 8,727 (4,364, 12,799)   | 5,800 (2,259, 8,942)    | 8,727 (4,364, 12,561)   | 8,727 (4,364, 13,091)   | 8,942 (5,800, 13,091)   | 8,942 (5,800, 13,413) | 8,727 (4,364, 13,091)    | 8,727 (5,800, 13,091)                |
| <b>Healthcare cost of critical care admission (£)</b>                        |                         |                         |                         |                         |                         |                       |                          |                                      |
| Mean (SD)                                                                    | 30,352 (35,116)         | 26,321 (34,702)         | 32,617 (37,578)         | 32,784 (33,219)         | 23,463 (25,529)         | 8,501 (8,689)         | 29,150 (31,633)          | 19,345 (15,827)                      |
| Median (Q1, Q3)                                                              | 17,439 (9,285, 39,663)  | 11,332 (7,555, 30,039)  | 19,569 (9,444, 42,351)  | 22,421 (9,444, 41,808)  | 16,999 (7,474, 31,356)  | 5,617 (1,482, 9,444)  | 18,887 (9,444, 38,468)   | 14,551 (7,555, 27,096)               |
| <b>Healthcare cost of critical care requiring mechanical ventilation (£)</b> |                         |                         |                         |                         |                         |                       |                          |                                      |
| Mean (SD)                                                                    | 51,103 (42,055)         | 52,000 (43,415)         | 52,071 (44,628)         | 51,106 (37,077)         | 41,379 (36,238)         | -                     | 48,677 (38,050)          | 39,029 (23,487)                      |
| Median (Q1, Q3)                                                              | 40,148 (23,517, 64,772) | 39,860 (19,930, 77,057) | 41,768 (24,912, 61,556) | 39,860 (23,517, 67,263) | 34,877 (18,291, 55,637) | -                     | 38,981 (22,421, 61,200)  | 39,029 (22,421, 55,637)              |

Blank cells (i.e. "-") are due those aged ≥85 years not receiving mechanical ventilation.

### Primary care cohort

The proportion of patients with  $\geq 1$  F2F GP or nurse consultation was higher in the older age groups (aged  $\geq 85$  years: 12.7%; aged 18 – 49 years: 3.4%;) (**Table 4**). Similar patterns were observed for  $\geq 1$  telephone consultations, however greater use was observed across all ages (aged 18 – 49 years: 6.1%; aged  $\geq 85$  years: 25.8%) when compared to F2F consultations.

When assessing those at risk of severe COVID-19, we observed a similar proportion of patients with  $\geq 1$  F2F consultations across the three risk definitions (McInnes Advisory Group: 6.8%; PANORAMIC: 5.9% and the Green Book: 8.1%) (see Supplementary materials eTable 6 for full details). However, the patterns of  $\geq 1$  telephone-based consultation slightly differed across the three risk definitions; with highest use noted for the Green Book criteria (17.3%) and lowest for the PANORAMIC criteria (12.4%). Of immunocompromised patients, 7.2% had at least one F2F consultation and 14.8% had at least one telephone consultation, in comparison to 4.1% and 7.8% for immunocompetent patients, respectively.

Among the primary care cohort,  $<1.0\%$  ( $n=253$ ) of patients received a primary care prescription for treatment of COVID-19.

The overall median costs were higher for F2F consultations compared to a telephone consultation among those with  $\geq 1$  primary care GP or nurse consultation: £39 (Q1, Q3: £7, £39) and £16 (Q1, Q3: £16, £16), respectively (**Table 5**). These costs did not differ across the age, risk definition and immunocompromised status stratification for either the F2F or telephone consultations (see Supplementary materials eTable 7 for full details). The costs associated with treatment in the primary care setting were also analysed. Given the low prescribing associated with COVID-19 diagnoses in the primary care cohort, the associated medication costs were negligible, with the exception of costs among those who were immunocompromised (median cost: £21; Q1, Q3: £3, £566).



**Table 4: HCRU in the four weeks after index stratified by age, risk of severe COVID-19 and immunocompromised status at baseline among the primary care cohort**

| HCRU                                                               | Age stratifications  |                        |                      |                     |                     |                   | Risk criteria             | Immunocompromised status at baseline |
|--------------------------------------------------------------------|----------------------|------------------------|----------------------|---------------------|---------------------|-------------------|---------------------------|--------------------------------------|
|                                                                    | All<br>(n=1,693,263) | 18-49<br>(n=1,161,843) | 50-64<br>(n=379,528) | 65-74<br>(n=92,573) | 75-84<br>(n=40,481) | ≥85<br>(n=18,838) | Green Book<br>(n=212,556) | Immunocompromised<br>(n=63,547)      |
| Any COVID-19 medication use: n (%)                                 | 253<br>(<1.0%)       | 69<br>(<1.0%)          | 63<br>(<1.0%)        | 33<br>(<1.0%)       | 39<br>(0.1%)        | 49<br>(0.3%)      | 116 (0.1%)                | 51<br>(0.1%)                         |
| Primary care consultations- F2F:<br>number with ≥ 1 visit (%)      | 71,039<br>(4.2%)     | 39,108 (3.4%)          | 19,330 (5.1%)        | 6,491 (7.0%)        | 3,726 (9.2%)        | 2,384 (12.7%)     | 17,237 (8.1%)             | 4,587<br>(7.2%)                      |
| Primary care consultations- Telephone:<br>number with ≥ 1 call (%) | 137,148<br>(8.1%)    | 70,675 (6.1%)          | 40,311 (10.6%)       | 13,434 (14.5%)      | 7,860 (19.4%)       | 4,868 (25.8%)     | 36,852 (17.3%)            | 9,375<br>(14.8%)                     |

**Table 5: Costs in the four weeks after index stratified by age, risk of severe COVID-19 and immunocompromised status at baseline among the primary care cohort**

| Costs                                           | Age stratifications   |                         |                       |                      |                      |                   | Risk criteria              | Immunocompromised status at baseline |
|-------------------------------------------------|-----------------------|-------------------------|-----------------------|----------------------|----------------------|-------------------|----------------------------|--------------------------------------|
|                                                 | All<br>(n= 1,693,263) | 18-49<br>(n= 1,161,843) | 50-64<br>(n= 379,528) | 65-74<br>(n= 92,573) | 75-84<br>(n= 40,481) | ≥85<br>(n=18,838) | Green Book<br>(n= 212,556) | Immunocompromised<br>(n= 63,547)     |
| <b>Medication cost (£)</b>                      |                       |                         |                       |                      |                      |                   |                            |                                      |
| Mean (SD)                                       | 165 (465)             | 242 (538)               | 204 (505)             | 134 (447)            | 187 (530)            | 8 (36)            | 161 (448)                  | 486 (759)                            |
| Median (Q1, Q3)                                 | 2 (2, 4)              | 3 (2, 256)              | 2 (2, 24)             | 2 (2, 3)             | 3 (1, 10)            | 3 (1, 3)          | 3 (2, 9)                   | 21 (3, 566)                          |
| <b>Primary care consultations-F2F (£)</b>       |                       |                         |                       |                      |                      |                   |                            |                                      |
| Mean (SD)                                       | 27 (22)               | 26 (21)                 | 28 (22)               | 27 (24)              | 27 (25)              | 27 (24)           | 28 (25)                    | 28 (25)                              |
| Median (Q1, Q3)                                 | 39 (7, 39)            | 39 (7, 39)              | 39 (7, 39)            | 39 (7, 39)           | 39 (7, 39)           | 39 (7, 39)        | 39 (7, 39)                 | 39 (7, 39)                           |
| <b>Primary care consultations-Telephone (£)</b> |                       |                         |                       |                      |                      |                   |                            |                                      |
| Mean (SD)                                       | 18 (10)               | 17 (9)                  | 18 (10)               | 18 (10)              | 19 (11)              | 20 (13)           | 19 (11)                    | 18 (10)                              |
| Median (Q1, Q3)                                 | 16 (16, 16)           | 16 (16, 16)             | 16 (16, 16)           | 16 (16, 16)          | 16 (16, 16)          | 16 (16, 16)       | 16 (16, 16)                | 16 (16, 16)                          |

## DISCUSSION

To the best of our knowledge, this is the first study to quantify HCRU and related costs specific to the acute phase of COVID-19 in all adults (both standard and high-risk) within the primary and secondary care settings in England. Costs and HCRU were primarily driven by COVID-19 associated hospitalisations, particularly among older adults and those admitted to critical care, which imposed direct medical cost and resource use burden on the UK healthcare system.

Our findings on the overall LoS (6.0 days) were consistent with national estimates, indicating between August 2020 to March 2021 the median LoS ranged from 4-11 days.(35) However, our data only covered early waves of the COVID-19 pandemic, where LoS fluctuated over time due to varying factors such as variant predominance, changes in COVID-19 testing guidance and COVID-19 vaccinations.(36) For the patients admitted to critical care, we observed a median LoS of 8 days. A retrospective cohort study of patients admitted to ICU between March and May 2020, using COVID-19 Hospitalisation in England Surveillance System (CHESS) data found median LoS ranged from 10-12 days.(37) This lower LoS observed in our study might partly be explained by refinements made to the treatment and management of COVID-19 patients over the course of the pandemic, starting with the publication of critical care guidance in March 2020.(38, 39) Further, we found critical care LoS was not monotonic with age and therefore its associated costs, which is also aligned with previous studies.(37, 40) It is possible that the LoS observed in patients aged  $\geq 85$  years was biased due to survivorship with a shorter apparent LoS due to an increased risk of death in the older ages. The proportion of patients admitted to critical care (14.8%) and requiring MV (6.0%) were also consistent with published English estimates over a longer data coverage period (10.6% and 5.6%, respectively).(41)

Our cost estimates associated with COVID-19 hospitalisation are similar to those used by the National Institute for Health and Care Excellence (NICE) Technology Appraisal assessing therapeutics for people with COVID-19, although the report restricted to severe COVID-19 patients and used non-comparable methodology.(42) Data from other countries, for instance a retrospective study of hospitalised COVID-19 patients in the US from 1 April to 31 December 31 2020 using claims data, estimated the average cost per day for overall admissions and ICU admissions was \$1,772 and \$2,902, respectively,(43) with evidence from Italy reporting the hospitalisation cost per day varying based on the complexity of care (low-complexity = €476; medium-complexity = €700; high-complexity = €1,402).(44) However, the generalisability of these estimates to the UK population are limited given differences in populations, data coverage period, COVID-19 management strategies, and healthcare systems. Notably, due to variability within the relatively smaller immunocompromised and hospitalised, it is likely that our findings related to costs in this group differ to existing studies.(45-47) However, as these patients are at an increased risk of severe COVID-19, they are likely to experience high HCRU and costs. Also, very minimal differences in HCRU were found across the different high-risk groups that were either prioritized for treatment (Highest risk group), eligible for the PANORAMIC clinical trial (PANORAMIC eligibility) or eligible for vaccination prioritization (Green book). All three subgroups incurred similar non-critical and critical care hospitalisation costs.

In the primary care setting, several major changes in the use of healthcare services occurred since the start of the pandemic, including: a reduction in health services (postponing non-urgent planned treatment and redeployment of NHS staff),(48) an increased use of telemedicine resulting from a change in policy (F2F appointments only when clinically necessary),(49) and a reluctance among patients to seek F2F care.(50-52) These factors may explain the higher use of GP or nurse telephone consultation across both study cohorts, and overall limited use of GP or nurse consultations amongst the primary care cohort.

1  
2  
3 Our findings demonstrated that COVID-19 related hospitalisation continues to pose substantial  
4 pressure and cost to the healthcare system in England.(9) This study reinforces the importance of  
5 continuing efforts with the UK COVID-19 vaccination program in reducing hospitalisation and  
6 severity of the disease.(53) Policy makers and healthcare professionals should persist with  
7 encouraging high vaccination coverage, specifically among vulnerable groups and those at higher  
8 risk of hospitalisation with COVID-19.(54)  
9

### 10 11 **Limitations of the study**

12 Our study has several limitations. First, whilst CPRD covers 24% of the population in England,(55) our  
13 previous published work found an underrepresentation of COVID-19 patients aged  $\geq 65$  years,  
14 particularly in the hospitalised cohort, and overrepresentation of patients living in specific English  
15 regions, such as London and the South East, for these two cohorts(19) and thus our findings should  
16 be interpreted with caution. Second, due to data latency, HES APC data was only available up to  
17 March 2021 and emergency department as well as outpatient data were unavailable. For patients in  
18 the primary care cohort after April 2021, hospitalization status is unknown and therefore are unable  
19 to describe the HCRU and costs associated with more recent waves of the coronavirus pandemic.  
20 Cost estimates and LoS in the hospitalised immunocompromised patients should be interpreted with  
21 caution due to the smaller sample size, and therefore future research with a larger sample size are  
22 needed to better assess the HCRU and costs associated with this particular group. Lastly, our findings  
23 on the limited primary care prescriptions for the treatment of COVID-19 are expected given the first  
24 antiviral for COVID-19 in the UK was approved in November 2021,(56) which occurred towards the  
25 end of the study period,(57) the UK's stringent access criteria when compared to other countries,  
26 and due to our definition of medication use (prescription on the same day as a COVID-19 diagnosis).  
27  
28

29 Future studies with a larger sample size are required to better quantify the economic burden of  
30 COVID-19 among immunocompromised patients. Studies should also explore the consequences of  
31 post-COVID conditions, to incorporate other aspects of HCRU e.g., readmissions, and the indirect  
32 costs associated with COVID-19 such as employment related sickness absence. Further, a better  
33 understanding of the health and social care needs of patients recovering from or who continue to  
34 experience symptoms of COVID-19 is required. Whilst this study focuses on HCRU and costs at the  
35 patient-level, further research estimating the national-level might also be informative for policy  
36 development. Lastly, this study highlights the need to focus on specific populations, e.g. those at risk  
37 of severe COVID-19; to better prepare for the next epidemic, future studies may consider assessing  
38 the economic impact of broader public health interventions, such as smoking prevention and weight  
39 loss programs.  
40  
41

### 42 **CONCLUSION**

43  
44 The present retrospective cohort study quantified COVID-19 HCRU and associated costs in England.  
45 Although the burden of COVID-19 has reduced following the rollout of COVID-19 vaccines in the UK,  
46 we observed substantial economic burden due to COVID-19 on the NHS. Importantly, this study  
47 showed much of the burden during the study period was driven by COVID-19 related  
48 hospitalisations, and that older adults are associated with higher burden. Findings from this study  
49 can be used to inform the long-term strategy for resource allocation in the management of COVID-  
50 19.  
51  
52  
53  
54  
55  
56  
57  
58  
59  
60

## Acknowledgments

Editorial/medical writing support under the guidance of the authors was funded by Pfizer and provided by Dr Gary Sidgwick PhD of Adelphi Real World, Bollington UK, in accordance with Good Publication Practice 2022 (GPP 2022) guidelines (<https://www.ismpp.org/gpp-2022>).

The authors gratefully acknowledge Tamuno Alfred, Darren Kailung Jeng and Chern Chuan Soo from Pfizer Inc. (New York, United States), Agnieszka Gajewska, Tomasz Mikołajczyk, Ewa Śleszyńska-Dopiera from Quanticate (Warsaw, Poland) and Olivia Massey from Adelphi Real World for statistical programming support.

## Copyright

The corresponding author has the right to grant on behalf of all authors and does grant on behalf of all authors, a worldwide licence to the Publishers and its licensees in perpetuity, in all forms, formats and media (whether known now or created in the future), to i) publish, reproduce, distribute, display and store the Contribution, ii) translate the Contribution into other languages, create adaptations, reprints, include within collections and create summaries, extracts and/or, abstracts of the Contribution, iii) create any other derivative work(s) based on the Contribution, iv) to exploit all subsidiary rights in the Contribution, v) the inclusion of electronic links from the Contribution to third party material where-ever it may be located; and, vi) licence any third party to do any or all of the above.

## Competing interests

All authors have completed the ICMJE uniform disclosure form at <http://www.icmje.org/disclosure-of-interest/> and declare: Jingyan Yang, Kathleen M. Andersen, Maya Reimbaeva, Leah McGrath, Carmen Tsang, Tendai Mugwagwa, Kevin Naicker, Diana Mendes, Tamuno Alfred, Mary Araghi and Jennifer L Nguyen are employees of Pfizer and may hold stock or stock options. Kiran K. Rai, Theo Tritton, Poppy Payne, Bethany Backhouse and Robert Wood are employees of Adelphi Real World, which received funds from Pfizer to conduct the study and develop the manuscript.

## Author contributions

The corresponding author, Jingyan Yang, attests that all listed authors meet authorship criteria and that no others meeting the criteria have been omitted.

JY conceptualized, designed, interpreted the data, revised and reviewed the manuscript. KMA designed, interpreted the data and reviewed the manuscript. KKR designed, interpreted the data and drafted the initial manuscript. TT interpreted the data and reviewed the manuscript. TM interpreted the data and reviewed the manuscript. MR conducted the analyses, interpreted the data and reviewed the manuscript. CT interpreted the data and reviewed the manuscript. LJM interpreted the data and reviewed the manuscript. PP interpreted the data and reviewed the manuscript. BB interpreted the data and reviewed the manuscript. DM interpreted the data and reviewed the manuscript. RB reviewed the manuscript. KN reviewed the manuscript. MA reviewed the manuscript. RW reviewed the manuscript. JLN conceptualized, revised and reviewed the manuscript.

## Role of the funding source

Funding for this study was provided by Pfizer Inc. The study protocol was developed collaboratively by Pfizer and Adelphi Real World. The protocol was independently reviewed and approved by CPRD's Research Data Governance (RDG) committee, and the analysis was conducted by Pfizer Inc.

1  
2  
3 Adelphi Real World wrote the manuscript, and both Pfizer and Adelphi Real World reviewed and  
4 approved the manuscript prior to submission.  
5  
6  
7

### 8 **Ethical approval**

9  
10 CPRD's Research Data Governance (RDG) committee approved this study (CPRD study ID:  
11 22\_002062) in July 2022 prior to obtaining the data relevant to the project. This study complied with  
12 all applicable laws regarding subject privacy. As all patient-level data were fully anonymised, and no  
13 direct patient contact or primary collection of individual patient data occurred, patient consent was  
14 not required.  
15  
16

### 17 **Dissemination to participants and related patient and public communities**

18  
19 The study findings will be disseminated to the public through appropriate channels.  
20  
21

### 22 **Data sharing statement**

23  
24 **Data may be obtained from a third party and are not publicly available.** Anonymised patient data  
25 were accessed under study-specific approvals. Electronic health records are considered sensitive  
26 data in the UK by the Data Protection Act and cannot be shared. Access to the primary care data and  
27 linked datasets could be requested from the Clinical Practice Research Datalink  
28 <https://www.cprd.com/research-applications>.  
29

### 30 **Transparency declaration**

31  
32 The lead author affirms that this manuscript is an honest, accurate, and transparent account of the  
33 study being reported; that no important aspects of the study have been omitted; and that any  
34 discrepancies from the study as planned (and, if relevant, registered) have been explained.  
35  
36

### 37 **Prior publication:**

38  
39 Data in this manuscript were accepted as three separate poster presentations at the International  
40 Society for Pharmacoeconomics and Outcomes Research (ISPOR) 2023, Boston, USA, in May 2023.  
41  
42  
43  
44  
45  
46  
47  
48  
49  
50  
51  
52  
53  
54  
55  
56  
57  
58  
59  
60

## REFERENCES

1. Johns Hopkins University of Medicine. Coronavirus Resource Center Dashboard 2023 [09 March 2023]. Available from: <https://coronavirus.jhu.edu/>.
2. GOV.UK. UK Summary - Coronavirus (COVID-19) in the UK 2023 [09 March 2023]. Available from: <https://coronavirus.data.gov.uk/>.
3. National Institute for Health and Care Excellence. COVID-19 rapid guideline: Managing COVID-19 2023 [13 March 2023]. Available from: <https://www.nice.org.uk/guidance/ng191/resources/covid19-rapid-guideline-managing-covid19-pdf-51035553326>.
4. World Health Organization (WHO). Therapeutics and COVID-19: living guideline 2023 [13 March 2023]. Available from: <https://app.magicapp.org/#/guideline/nBkO1E/section/EKDKdj>.
5. Soriano JB, Murthy S, Marshall JC, Relan P, Diaz JV. A clinical case definition of post-COVID-19 condition by a Delphi consensus. *The Lancet Infectious Diseases*. 2022;22(4):e102-e7.
6. Wolff D, Nee S, Hickey NS, Marscholke M. Risk factors for Covid-19 severity and fatality: a structured literature review. *Infection*. 2021;49(1):15-28.
7. Tazerji SS, Shahabinejad F, Tokasi M, Rad MA, Khan MS, Safdar M, et al. Global data analysis and risk factors associated with morbidity and mortality of COVID-19. *Gene Reports*. 2022;26:101505.
8. UK Health Security Agency (UKHSA). COVID-19: the green book, chapter 14a, pg 1-54 2022 [09 March 2023]. Available from: <https://www.gov.uk/government/publications/covid-19-the-green-book-chapter-14a>.
9. GOV.UK. Direct and indirect health impacts of COVID-19 in England: emerging Omicron impacts 04 August 2022 [24 March 2023]. Available from: <https://www.gov.uk/government/publications/direct-and-indirect-health-impacts-of-covid-19-in-england-emerging-omicron-impacts/direct-and-indirect-health-impacts-of-covid-19-in-england-emerging-omicron-impacts>.
10. Cunningham JW, Vaduganathan M, Claggett BL, Jering KS, Bhatt AS, Rosenthal N, et al. Clinical Outcomes in Young US Adults Hospitalized With COVID-19. *JAMA Internal Medicine*. 2021;181(3):379-81.
11. Di Fusco M, Shea KM, Lin J, Nguyen JL, Angulo FJ, Benigno M, et al. Health outcomes and economic burden of hospitalized COVID-19 patients in the United States. *Journal of Medical Economics*. 2021;24(1):308-17.
12. Lavery AM, Preston LE, Ko JY, Chevinsky JR, DeSisto CL, Pennington AF, et al. Characteristics of Hospitalized COVID-19 Patients Discharged and Experiencing Same-Hospital Readmission - United States, March-August 2020. *MMWR Morb Mortal Wkly Rep*. 2020;69(45):1695-9.
13. Richards F, Kodjamanova P, Chen X, Li N, Atanasov P, Bennetts L, et al. Economic Burden of COVID-19: A Systematic Review. *ClinicoEconomics and Outcomes Research*. 2022;14:293-307.
14. Keogh-Brown MR, Jensen HT, Edmunds WJ, Smith RD. The impact of Covid-19, associated behaviours and policies on the UK economy: A computable general equilibrium model. *SSM Popul Health*. 2020;12:100651.
15. Clinical Practice Research Datalink (CPRD). CPRD Aurum March 2022 (Version 2022.03.001) [Data set]. Clinical Practice Research Datalink. 2022 [09 March 2023]. Available from: <https://doi.org/10.48329/MY9S-4X08>.
16. Clinical Practice Research Datalink (CPRD). CPRD linked data 2022 [09 March 2023]. Available from: <https://cprd.com/cprd-linked-data>.
17. Clinical Practice Research Datalink (CPRD). Release Notes: CPRD Aurum May 2022 [09 March 2023]. Available from: <https://cprd.com/sites/default/files/2022-05/2022-05%20CPRD%20Aurum%20Release%20Notes.pdf>.
18. Clinical Practice Research Datalink (CPRD). Feasibility counts for SARS-CoV-2-related codes in CPRD primary care data May 2022 [09 March 2023]. Available from: <https://cprd.com/sites/default/files/2022-05/SARS-CoV-2%20counts%20May2022.pdf>.
19. Andersen KM, McGrath LJ, Reimbaeva M, Mendes D, Nguyen JL, Rai KK, et al. Persons Diagnosed with COVID in England in the Clinical Practice Research Datalink (CPRD): A Cohort Description. *medRxiv*. 2023:2023.03.17.23287415.
20. NHS Digital. Coronavirus test results now visible to GPs 20 July 2020 [09 March 2023]. Available from: <https://digital.nhs.uk/news/2020/coronavirus-test-results-now-visible-to-gps>.

21. Clinical Practice Research Datalink (CPRD). CPRD Aurum Glossary of terms/Data definitions v2.0 [13 March 2023]. Available from: <https://cprd.com/sites/default/files/2023-02/CPRD%20Aurum%20Glossary%20Terms%20v2.pdf>.
22. Quan H, Sundararajan V, Halfon P, Fong A, Burnand B, Luthi JC, et al. Coding algorithms for defining comorbidities in ICD-9-CM and ICD-10 administrative data. *Med Care*. 2005;43(11):1130-9.
23. World Health Organization (WHO). COVID-19 Therapeutic Trial Synopsis 2020 [09 March 2023]. Available from: <https://www.who.int/publications/i/item/covid-19-therapeutic-trial-synopsis>.
24. NHS England. Interim Clinical Commissioning Policy: Treatments for non-hospitalised patients with COVID-19 28 November 2022 [09 March 2023]. Available from: <https://www.england.nhs.uk/coronavirus/wp-content/uploads/sites/52/2022/11/C1710-interim-clinical-commissioning-policy-treatments-for-non-hospitalised-patients-with-covid-19-nov-22.pdf>.
25. National Institute for Health and Care Excellence. Managing COVID 19: treatments (May 2022 v24.0) 2022 [
26. NHS England. National Cost Collection for the NHS 2020/2021 2021 [09 March 2023]. Available from: <https://www.england.nhs.uk/costing-in-the-nhs/national-cost-collection/>.
27. NHS Digital. Hospital Admitted Patient Care Activity 2020-21 16 September 2021 [14 March 2023]. Available from: <https://digital.nhs.uk/data-and-information/publications/statistical/hospital-admitted-patient-care-activity/2020-21>.
28. Personal Social Services Research Unit (PSSRU). Unit Costs of Health and Social Care 2022 [09 March 2023]. Available from: <https://www.pssru.ac.uk/project-pages/unit-costs/>.
29. NHS Business Services Authority (NHSBSA). Drug Tariff 2022 [09 March 2023]. Available from: <https://www.nhsbsa.nhs.uk/pharmacies-gp-practices-and-appliance-contractors/drug-tariff>.
30. Intensive Care National Audit and Research Centre (ICNARC). COVID-19 Report 2023 [14 March 2023]. Available from: <https://www.icnarc.org/our-audit/audits/cmp/reports>.
31. Ioannou GN, Locke E, Green P, Berry K, O'Hare AM, Shah JA, et al. Risk Factors for Hospitalization, Mechanical Ventilation, or Death Among 10 131 US Veterans With SARS-CoV-2 Infection. *JAMA Network Open*. 2020;3(9):e2022310-e.
32. Department of Health and Social Care. Defining the highest-risk clinical subgroups upon community infection with SARS-CoV-2 when considering the use of neutralising monoclonal antibodies (nMABs) and antiviral drugs: independent advisory group report 2022 [09 March 2023]. Available from: <https://www.gov.uk/government/publications/higher-risk-patients-eligible-for-covid-19-treatments-independent-advisory-group-report/defining-the-highest-risk-clinical-subgroups-upon-community-infection-with-sars-cov-2-when-considering-the-use-of-neutralising-monoclonal-antibodies>.
33. University of Oxford. PANORAMIC - Help find effective early treatments for COVID-19 2022 [09 March 2023]. Available from: <https://www.panoramictrial.org/>.
34. Davidson JA, Banerjee A, Smeeth L, McDonald HI, Grint D, Herrett E, et al. Risk of acute respiratory infection and acute cardiovascular events following acute respiratory infection among adults with increased cardiovascular risk in England between 2008 and 2018: a retrospective, population-based cohort study. *The Lancet Digital Health*. 2021;3(12):e773-e83.
35. The Nuffield Trust. Chart of the week: How long do Covid-19 patients spend in hospital? 01 February 2023 [16 March 2023]. Available from: <https://www.nuffieldtrust.org.uk/resource/chart-of-the-week-how-long-do-covid-19-patients-spend-in-hospital-1>.
36. Yaesoubi R, You S, Xi Q, Menzies NA, Tuite A, Grad YH, et al. Simple decision rules to predict local surges in COVID-19 hospitalizations during the winter and spring of 2022. *medRxiv*. 2021:2021.12.13.21267657.
37. Shryane N, Pampaka M, Aparicio-Castro A, Ahmad S, Elliot MJ, Kim J, et al. Length of Stay in ICU of Covid-19 patients in England, March - May 2020. *Int J Popul Data Sci*. 2021;5(4):1411.
38. Peter Bamford, Andrew Bentley, Jane Dean, David Whitmore, Wilson-Baig N. Intensive Care Society Guidance for Prone Positioning of the Conscious COVID Patient 2020 April 2020 [24 March 2023]. Available from: <https://emcrit.org/wp-content/uploads/2020/04/2020-04-12-Guidance-for-conscious-proning.pdf>.
39. National Institute for Health and Care Excellence. COVID-19 rapid guideline: critical care in adults (ng159) 20 March 2020 [updated 12 February 2021] 24 March 2023]. Available from: <https://www.nice.org.uk/guidance/ng159>.
40. Intensive Care National Audit and Research Centre (ICNARC). ICNARC report on COVID-19 in critical care 03 July 2020 [24 March 2023]. Available from: <https://www.icnarc.org/DataServices/Attachments/Download/da626009-65bd-ea11-9127-00505601089b>.



- 1  
2  
3 41. Thygesen JH, Tomlinson C, Hollings S, Mizani MA, Handy A, Akbari A, et al. COVID-19  
4 trajectories among 57 million adults in England: a cohort study using electronic health records. *The*  
5 *Lancet Digital Health*. 2022;4(7):e542-e57.
- 6 42. National Institute for Health and Care Excellence. Multiple Technology Appraisal -  
7 Therapeutics for people with COVID-19 [ID4038] Committee Papers 2023 [cited 24 March 2023].  
8 Available from: <https://www.nice.org.uk/guidance/gid-ta10936/documents/committee-papers-2>.
- 9 43. Ohsfeldt RL, Choong CK, Mc Collam PL, Abedtash H, Kelton KA, Burge R. Inpatient Hospital  
10 Costs for COVID-19 Patients in the United States. *Adv Ther*. 2021;38(11):5557-95.
- 11 44. Foglia E, Ferrario L, Schettini F, Pagani MB, Dalla Bona M, Porazzi E. COVID-19 and  
12 hospital management costs: the Italian experience. *BMC Health Serv Res*. 2022;22(1):991.
- 13 45. Walker JL, Grint DJ, Strongman H, Eggo RM, Peppia M, Minassian C, et al. UK prevalence of  
14 underlying conditions which increase the risk of severe COVID-19 disease: a point prevalence study  
15 using electronic health records. *BMC Public Health*. 2021;21(1):484.
- 16 46. Soley-Bori M, Ashworth M, Bisquera A, Dodhia H, Lynch R, Wang Y, et al. Impact of  
17 multimorbidity on healthcare costs and utilisation: a systematic review of the UK literature. *British*  
18 *Journal of General Practice*. 2021;71(702):e39-e46.
- 19 47. Goldman JD, Robinson PC, Uldrick TS, Ljungman P. COVID-19 in immunocompromised  
20 populations: implications for prognosis and repurposing of immunotherapies. *Journal for*  
21 *ImmunoTherapy of Cancer*. 2021;9(6):e002630.
- 22 48. The Health Foundation. Non-COVID-19 NHS care during the pandemic - Activity trends for  
23 key NHS services in England 12 December 2020 [13 March 2023]. Available from:  
24 [https://www.health.org.uk/news-and-comment/charts-and-infographics/non-covid-19-nhs-care-during-](https://www.health.org.uk/news-and-comment/charts-and-infographics/non-covid-19-nhs-care-during-the-pandemic)  
25 [the-pandemic](https://www.health.org.uk/news-and-comment/charts-and-infographics/non-covid-19-nhs-care-during-the-pandemic).
- 26 49. Ahmed S, Sanghvi K, Yeo D. Telemedicine takes centre stage during COVID-19 pandemic.  
27 *BMJ Innovations*. 2020;6(4):252-4.
- 28 50. National Institute for Health and Care Research. How have GP practices adapted to the  
29 COVID-19 pandemic? 2020 [13 March 2023]. Available from: [https://arc-](https://arc-w.nihr.ac.uk/research/projects/collecting-rapid-covid-19-intelligence-to-improve-primary-care-response/)  
30 [w.nihr.ac.uk/research/projects/collecting-rapid-covid-19-intelligence-to-improve-primary-care-](https://arc-w.nihr.ac.uk/research/projects/collecting-rapid-covid-19-intelligence-to-improve-primary-care-response/)  
31 [response/](https://arc-w.nihr.ac.uk/research/projects/collecting-rapid-covid-19-intelligence-to-improve-primary-care-response/).
- 32 51. The Health Foundation. Public confidence in using NHS returning but concerns persist among  
33 groups worst affected by COVID-19 10 September 2020 [13 March 2023]. Available from:  
34 [https://www.health.org.uk/news-and-comment/news/public-confidence-in-using-nhs-returning-but-](https://www.health.org.uk/news-and-comment/news/public-confidence-in-using-nhs-returning-but-concerns-persist)  
35 [concerns-persist](https://www.health.org.uk/news-and-comment/news/public-confidence-in-using-nhs-returning-but-concerns-persist).
- 36 52. The Health Foundation. How has the COVID-19 pandemic impacted primary care? 27 May  
37 2021 [13 March 2023]. Available from: [https://www.health.org.uk/news-and-comment/charts-and-](https://www.health.org.uk/news-and-comment/charts-and-infographics/how-has-the-covid-19-pandemic-impacted-primary-care)  
38 [infographics/how-has-the-covid-19-pandemic-impacted-primary-care](https://www.health.org.uk/news-and-comment/charts-and-infographics/how-has-the-covid-19-pandemic-impacted-primary-care).
- 39 53. Rahmani K, Shavaleh R, Forouhi M, Disfani HF, Kamandi M, Oskooi RK, et al. The  
40 effectiveness of COVID-19 vaccines in reducing the incidence, hospitalization, and mortality from  
41 COVID-19: A systematic review and meta-analysis. *Front Public Health*. 2022;10:873596.
- 42 54. Cook TM, Roberts JV. Impact of vaccination by priority group on UK deaths, hospital  
43 admissions and intensive care admissions from COVID-19. *Anaesthesia*. 2021;76(5):608-16.
- 44 55. Wolf A, Dedman D, Campbell J, Booth H, Lunn D, Chapman J, et al. Data resource profile:  
45 Clinical Practice Research Datalink (CPRD) Aurum. *International Journal of Epidemiology*.  
46 2019;48(6):1740-g.
- 47 56. GOV.UK. First oral antiviral for COVID-19, Lagevrio (molnupiravir), approved by MHRA 04  
48 November 2021 [13 March 2023]. Available from: [https://www.gov.uk/government/news/first-oral-](https://www.gov.uk/government/news/first-oral-antiviral-for-covid-19-lagevrio-molnupiravir-approved-by-mhra)  
49 [antiviral-for-covid-19-lagevrio-molnupiravir-approved-by-mhra](https://www.gov.uk/government/news/first-oral-antiviral-for-covid-19-lagevrio-molnupiravir-approved-by-mhra).
- 50 57. GOV.UK. Government launches COVID-19 Antivirals Taskforce to roll out innovative home  
51 treatments this autumn 20 April 2021 [13 March 2023]. Available from:  
52 [https://www.gov.uk/government/news/government-launches-covid-19-antivirals-taskforce-to-roll-out-](https://www.gov.uk/government/news/government-launches-covid-19-antivirals-taskforce-to-roll-out-innovative-home-treatments-this-autumn)  
53 [innovative-home-treatments-this-autumn](https://www.gov.uk/government/news/government-launches-covid-19-antivirals-taskforce-to-roll-out-innovative-home-treatments-this-autumn).
- 54  
55  
56  
57  
58  
59  
60

COVID-19 HCRU Adults manuscript – Supplementary materials

SUPPLEMENTARY MATERIALS: “Healthcare resource utilisation and costs of hospitalisation and primary care among adults in England: a population-based cohort study” (Yang, Andersen, Rai et al 2023)

**Supplementary eFigure 1** Study design schematic

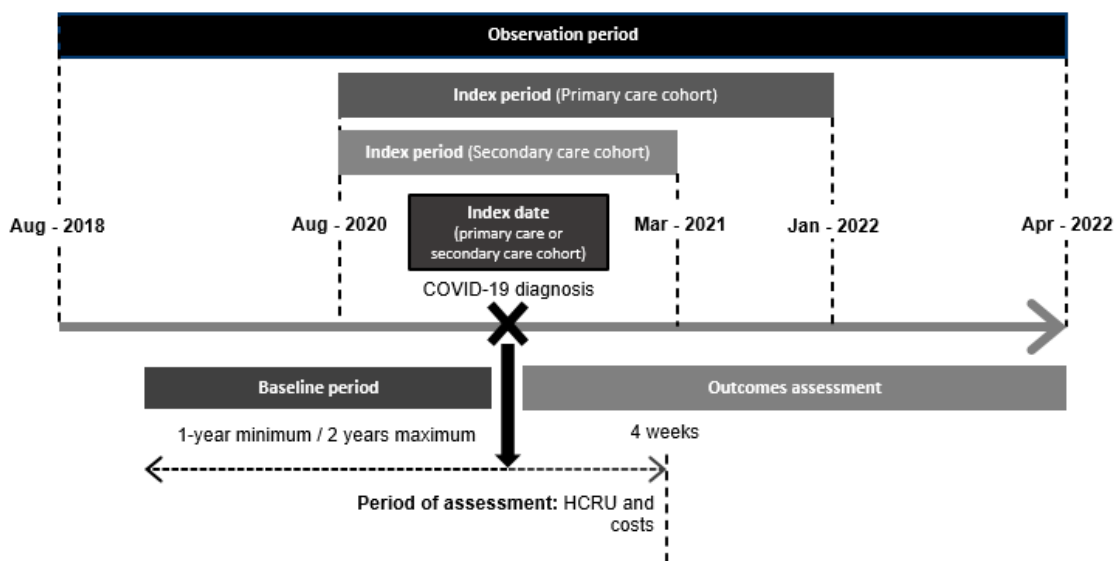

Note: When assessing disease severity, the highest level of severity experienced during the hospitalisation was reported.

**Supplementary eTable 1:** COVID-19-related medications

| Generic name           |
|------------------------|
| Nirmatrelvir/ritonavir |
| Sotrovimab             |
| Molnupiravir           |
| Casirivimab/imdevimab  |
| Remdesivir             |
| Dexamethasone          |
| Tocilizumab            |
| Sarilumab              |
| Baricitinib            |

## COVID-19 HCRU Adults manuscript – Supplementary materials

**Supplementary eTable 2:** HCRU in the four weeks after index stratified by age, risk of severe COVID-19 and immunocompromised status at baseline among the hospitalised cohort

| HCRU                                     | Age stratifications |                    |                    |                    |                    |                    | Risk criteria                            |                         |                          | Immunocompromised status at baseline |                      |
|------------------------------------------|---------------------|--------------------|--------------------|--------------------|--------------------|--------------------|------------------------------------------|-------------------------|--------------------------|--------------------------------------|----------------------|
|                                          | All<br>(n=13,105)   | 18-49<br>(n=3,127) | 50-64<br>(n=4,844) | 65-74<br>(n=2,386) | 75-84<br>(n=1,690) | ≥85<br>(n=1,058)   | McInnes Ad-<br>visory Group<br>(n=4,323) | PANORAMIC<br>(n=11,011) | Green Book<br>(n= 5,341) | IC<br>(n=181)                        | Non-IC<br>(n=12,924) |
| <b>Length of hospital stay (in days)</b> |                     |                    |                    |                    |                    |                    |                                          |                         |                          |                                      |                      |
| Mean (SD)                                | 9.2<br>(10.0)       | 6.4<br>(8.1)       | 9.0 (10.1)         | 10.8 (10.9)        | 11.2 (10.2)        | 11.4 (9.7)         | 9.9 (10.0)                               | 9.8 (10.2)              | 10.0<br>(9.8)            | 9.0<br>(6.7)                         | 9.2 (10.0)           |
| Median (Q1, Q3)                          | 6.0<br>(4.0, 11.0)  | 5.0<br>(2.0, 7.0)  | 6.0<br>(4.0, 10.0) | 8.0<br>(5.0, 13.0) | 8.0<br>(5.0, 14.0) | 8.0<br>(5.0, 15.0) | 7.0<br>(4.0, 12.0)                       | 7.0<br>(4.0, 12.0)      | 7.0<br>(4.0, 12.0)       | 7.0<br>(4.5, 12.0)                   | 6.0<br>(4.0, 11.0)   |
| <b>Critical care admission</b>           |                     |                    |                    |                    |                    |                    |                                          |                         |                          |                                      |                      |
| n (%)                                    | 1,934 (14.8%)       | 399 (12.8%)        | 896 (18.5%)        | 456 (19.1%)        | 165 (9.8%)         | 18<br>(1.7%)       | 608 (14.1%)                              | 1,687 (15.3%)           | 695 (13.0%)              | 10 (5.5%)                            | 1,924 (14.9%)        |
| <b>Length of stay in critical care</b>   |                     |                    |                    |                    |                    |                    |                                          |                         |                          |                                      |                      |
| Mean (SD)                                | 11.5 (11.2)         | 9.7 (10.9)         | 12.3 (11.8)        | 12.3 (11.1)        | 10.0<br>(8.9)      | 5.3<br>(5.6)       | 11.4 (10.9)                              | 11.7 (11.1)             | 11.2 (10.6)              | 9.0<br>(5.8)                         | 11.5 (11.3)          |
| Median (Q1, Q3)                          | 8.0<br>(4.0, 15.0)  | 6.0<br>(4.0, 11.0) | 8.5<br>(5.0, 16.0) | 9.0<br>(5.0, 15.0) | 8.0<br>(4.0, 14.0) | 4.0<br>(1.0, 7.0)  | 8.0<br>(5.0, 15.0)                       | 8.0<br>(5.0, 15.0)      | 8.0<br>(5.0, 14.0)       | 8.5<br>(4.0, 13.0)                   | 8.0<br>(4.2, 15.0)   |
| <b>Mechanical ventilation</b>            |                     |                    |                    |                    |                    |                    |                                          |                         |                          |                                      |                      |
| n (%)                                    | 792<br>(6.0%)       | 135<br>(4.3%)      | 398<br>(8.2%)      | 204<br>(8.6%)      | 55<br>(3.3%)       | 0                  | 250<br>(5.8%)                            | 713<br>(6.5%)           | 278<br>(5.2%)            | <5                                   | 790<br>(6.1%)        |
| <b>Mechanical ventilation days</b>       |                     |                    |                    |                    |                    |                    |                                          |                         |                          |                                      |                      |
| Mean (SD)                                | 1.2<br>(0.5)        | 1.2<br>(0.4)       | 1.2<br>(0.4)       | 1.2<br>(0.5)       | 1.1<br>(0.4)       | 0                  | 1.2<br>(0.4)                             | 1.2<br>(0.5)            | 1.2<br>(0.4)             | N/A*                                 | 1.2<br>(0.5)         |
| Median (Q1, Q3)                          | 1.0<br>(1.0, 1.0)   | 1.0<br>(1.0, 1.0)  | 1.0<br>(1.0, 1.0)  | 1.0<br>(1.0, 1.0)  | 1.0<br>(1.0, 1.0)  | 0                  | 1.0<br>(1.0, 1.0)                        | 1.0<br>(1.0, 1.0)       | 1.0<br>(1.0, 1.0)        | N/A*                                 | 1.0<br>(1.0, 1.0)    |

In the event of multiple hospitalisations (or critical care stays) during the acute COVID-19 phase, the average per person, rather than the cumulative total, was used.

\*Suppressed to comply with the reporting rules.

**IC: immunocompromised; Non-IC: non-immunocompromised also known as immunocompetent.**

## COVID-19 HCRU Adults manuscript – Supplementary materials

**Supplementary eTable 3:** Costs in the four weeks after index stratified by age, risk of severe COVID-19 and immunocompromised status at baseline among the hospitalised cohort

| Costs                                                                        | Age stratifications     |                         |                         |                         |                         |                       | Risk criteria                     |                         |                         | Immunocompromised status at baseline |                         |
|------------------------------------------------------------------------------|-------------------------|-------------------------|-------------------------|-------------------------|-------------------------|-----------------------|-----------------------------------|-------------------------|-------------------------|--------------------------------------|-------------------------|
|                                                                              | All (n= 13,105)         | 18-49 (n= 3,127)        | 50-64 (n= 4,844)        | 65-74 (n= 2,386)        | 75-84 (n= 1,690)        | ≥85 (n=1,058)         | McInnes Advisory Group (n= 4,323) | PANORAMIC (n= 11,011)   | Green Book (n= 5,341)   | IC (n=181)                           | Non-IC (n=12,924)       |
| <b>Healthcare cost per hospitalisation (£)</b>                               |                         |                         |                         |                         |                         |                       |                                   |                         |                         |                                      |                         |
| Mean (SD)                                                                    | 13,059 (18,659)         | 10,215 (16,242)         | 14,396 (21,874)         | 15,655 (20,965)         | 12,500 (12,409)         | 10,365 (6,773)        | 13,436 (17,582)                   | 13,693 (19,028)         | 13,009 (16,509)         | 10,814 (8,525)                       | 13,090 (18,761)         |
| Median (Q1, Q3)                                                              | 8,727 (4,364, 13,091)   | 7,703 (2,994, 11,600)   | 8,727 (4,364, 14,317)   | 8,727 (4,471, 17,399)   | 8,942 (5,800, 13,413)   | 8,835 (5,800, 13,091) | 8,727 (4,471, 14,450)             | 8,727 (4,364, 13,759)   | 8,727 (4,471, 13,413)   | 8,727 (5,800, 13,063)                | 8,727 (4,364, 13,091)   |
| <b>Healthcare cost of non-critical care admission (£)</b>                    |                         |                         |                         |                         |                         |                       |                                   |                         |                         |                                      |                         |
| Mean (SD)                                                                    | 9,360 (7,275)           | 7,516 (6,294)           | 9,199 (7,028)           | 10,366 (7,990)          | 10,898 (7,787)          | 10,876 (7,308)        | 10,059 (7,634)                    | 9,761 (7,412)           | 10,041 (7,536)          | 10,283 (6,511)                       | 9,347 (7,284)           |
| Median (Q1, Q3)                                                              | 8,727 (4,364, 12,799)   | 5,800 (2,259, 8,942)    | 8,727 (4,364, 12,561)   | 8,727 (4,364, 13,091)   | 8,942 (5,800, 13,091)   | 8,942 (5,800, 13,413) | 8,727 (4,364, 13,091)             | 8,727 (4,364, 13,091)   | 8,727 (4,364, 13,091)   | 8,727 (5,800, 13,091)                | 8,727 (4,364, 12,764)   |
| <b>Healthcare cost of critical care admission (£)</b>                        |                         |                         |                         |                         |                         |                       |                                   |                         |                         |                                      |                         |
| Mean (SD)                                                                    | 30,352 (35,116)         | 26,321 (34,702)         | 32,617 (37,578)         | 32,784 (33,219)         | 23,463 (25,529)         | 8,501 (8,689)         | 29,441 (32,155)                   | 30,988 (34,876)         | 29,150 (31,633)         | 19,345 (15,827)                      | 30,409 (35,181)         |
| Median (Q1, Q3)                                                              | 17,439 (9,285, 39,663)  | 11,332 (7,555, 30,039)  | 19,569 (9,444, 42,351)  | 22,421 (9,444, 41,808)  | 16,999 (7,474, 31,356)  | 5,617 (1,482, 9,444)  | 18,887 (9,285, 38,768)            | 18,887 (9,444, 39,860)  | 18,887 (9,444, 38,468)  | 14,551 (7,555, 27,096)               | 17,439 (9,285, 39,663)  |
| <b>Healthcare cost of critical care requiring mechanical ventilation (£)</b> |                         |                         |                         |                         |                         |                       |                                   |                         |                         |                                      |                         |
| Mean (SD)                                                                    | 51,103 (42,055)         | 52,000 (43,415)         | 52,071 (44,628)         | 51,106 (37,077)         | 41,379 (36,238)         | -                     | 46,364 (38,594)                   | 50,686 (41,554)         | 48,677 (38,050)         | 39,029 (23,487)                      | 51,135 (42,098)         |
| Median (Q1, Q3)                                                              | 40,148 (23,517, 64,772) | 39,860 (19,930, 77,057) | 41,768 (24,912, 61,556) | 39,860 (23,517, 67,263) | 34,877 (18,291, 55,637) | -                     | 37,369 (20,904, 57,486)           | 39,860 (23,855, 62,712) | 38,981 (22,421, 61,200) | 39,029 (22,421, 55,637)              | 40,148 (23,517, 64,813) |

Blank cells (i.e. “-”) are due those aged ≥85 years not receiving mechanical ventilation.

**IC: immunocompromised; Non-IC: non-immunocompromised also known as immunocompetent.**

COVID-19 HCRU Adults manuscript – Supplementary materials

**Supplementary eTable 4:** Primary care HCRU stratified by age, risk of severe COVID and immunocompromised status at baseline among the hospitalised cohort

| HCRU                                                               | All<br>(n=13,105) | Age stratifications |                    |                    |                    |                  | Risk criteria                            |                         |                             | Immunocompromised status<br>at baseline |                      |
|--------------------------------------------------------------------|-------------------|---------------------|--------------------|--------------------|--------------------|------------------|------------------------------------------|-------------------------|-----------------------------|-----------------------------------------|----------------------|
|                                                                    |                   | 18-49<br>(n=3,127)  | 50-64<br>(n=4,844) | 65-74<br>(n=2,386) | 75-84<br>(n=1,690) | ≥85<br>(n=1,058) | McInnes Ad-<br>visory Group<br>(n=4,323) | PANORAMIC<br>(n=11,011) | Green<br>Book<br>(n= 5,341) | IC<br>(n=181)                           | Non-IC<br>(n=12,924) |
| Any COVID-19 medication use: n, (%)                                | 29<br>(0.2%)      | 6 (0.2%)            | 9 (0.2%)           | 5 (0.2%)           | 5 (0.3%)           | <5               | 14<br>(0.3%)                             | 27<br>(0.3%)            | 15<br>(0.3%)                | <5                                      | 28<br>(0.2%)         |
| Primary care consultations- F2F: number<br>with ≥ 1 visit (%)      | 2,489 (19.0%)     | 559 (17.9%)         | 921 (19.0%)        | 425 (17.8%)        | 354 (21.0%)        | 230 (21.7%)      | 900 (20.8%)                              | 2,124<br>(19.3%)        | 1,093<br>(20.5%)            | 31<br>(17.1%)                           | 2,458 (19.0%)        |
| Primary care consultations- Telephone:<br>number with ≥ 1 call (%) | 5,077 (38.7%)     | 1,178<br>(37.7%)    | 1,840<br>(38.0%)   | 949 (39.8%)        | 701 (41.5%)        | 409 (38.7%)      | 1,815 (42.0%)                            | 4,341<br>(39.4%)        | 2,306<br>(43.2%)            | 87<br>(48.1%)                           | 4,990 (38.6%)        |

IC: immunocompromised; Non-IC: non-immunocompromised also known as immunocompetent.

## COVID-19 HCRU Adults manuscript – Supplementary materials

**Supplementary eTable 5:** Primary care costs stratified by age, risk of severe COVID and immunocompromised status at baseline among the hospitalised cohort

|                                                  | Age stratifications  |                      |                      |                      |                      |                      | Risk criteria                        |                          |                          | Immunocompromised status at baseline |                      |
|--------------------------------------------------|----------------------|----------------------|----------------------|----------------------|----------------------|----------------------|--------------------------------------|--------------------------|--------------------------|--------------------------------------|----------------------|
|                                                  | All<br>(n= 13,105)   | 18-49<br>(n= 3,127)  | 50-64<br>(n= 4,844)  | 65-74<br>(n= 2,386)  | 75-84<br>(n= 1,690)  | ≥85<br>(n=1,058)     | McInnes Advisory Group<br>(n= 4,323) | PANORAMIC<br>(n= 11,011) | Green Book<br>(n= 5,341) | IC<br>(n=181)                        | Non-IC<br>(n=12,924) |
| <b>Medication cost (£)</b>                       |                      |                      |                      |                      |                      |                      |                                      |                          |                          |                                      |                      |
| Mean (SD)                                        | 4.8 (15.4)           | 1.8 (1.1)            | 1.9 (1.5)            | 2.6 (1.4)            | 2.2 (1.3)            | 22.2 (41.6)          | 8.2 (22.0)                           | 5.1 (15.9)               | 7.7 (21.3)               | 0.6 (-)                              | 5.0 (15.7)           |
| Median<br>(Q1, Q3)                               | 1.8 (1.2, 2.5)       | 1.5 (0.9, 2.5)       | 1.3 (1.2, 1.8)       | 1.8 (1.8, 2.5)       | 2.5 (1.3, 2.8)       | 1.9 (0.9, 43.6)      | 2.5 (1.3, 3.6)                       | 1.8 (1.2, 2.5)           | 2.5 (1.3, 3.6)           | 0.6 (0.6, 0.6)                       | 1.8 (1.2, 2.5)       |
| <b>Primary care consultations- F2F (£)</b>       |                      |                      |                      |                      |                      |                      |                                      |                          |                          |                                      |                      |
| Mean (SD)                                        | 30.5 (26.5)          | 31.4 (30.3)          | 31.9 (24.7)          | 30.5 (26.3)          | 28.7 (28.1)          | 25.5 (20.1)          | 30.0 (24.6)                          | 30.4 (25.8)              | 30.0 (25.6)              | 35.6 (27.1)                          | 30.4 (26.5)          |
| Median<br>(Q1, Q3)                               | 39.2<br>(6.8, 39.2)  | 13.5<br>(6.8, 39.2)  | 39.2<br>(6.8, 39.2)                  | 39.2<br>(6.8, 39.2)      | 39.2<br>(6.8, 39.2)      | 39.2<br>(13.5, 39.2)                 | 39.2<br>(6.8, 39.2)  |
| <b>Primary care consultations- Telephone (£)</b> |                      |                      |                      |                      |                      |                      |                                      |                          |                          |                                      |                      |
| Mean (SD)                                        | 22.5 (13.8)          | 23.2 (14.7)          | 22.7 (13.6)          | 22.2 (14.0)          | 21.6 (13.1)          | 21.4 (12.5)          | 23.0 (14.2)                          | 22.4 (13.6)              | 22.8 (13.9)              | 23.0 (15.5)                          | 22.5 (13.8)          |
| Median<br>(Q1, Q3)                               | 15.5<br>(15.5, 31.0)                 | 15.5<br>(15.5, 31.0)     | 15.5<br>(15.5, 31.0)     | 15.5<br>(15.5, 31.0)                 | 15.5<br>(15.5, 31.0) |

IC: immunocompromised; Non-IC: non-immunocompromised also known as immunocompetent.

## COVID-19 HCRU Adults manuscript – Supplementary materials

**Supplementary eTable 6:** HCRU in the four weeks after index stratified by age, risk of severe COVID-19 and immunocompromised status at baseline among the primary care cohort

| HCRU                                                                  | Age stratifications  |                        |                      |                     |                     |                   | Risk criteria                         |                          |                           | Immunocompromised status at baseline |                         |
|-----------------------------------------------------------------------|----------------------|------------------------|----------------------|---------------------|---------------------|-------------------|---------------------------------------|--------------------------|---------------------------|--------------------------------------|-------------------------|
|                                                                       | All<br>(n=1,693,263) | 18-49<br>(n=1,161,843) | 50-64<br>(n=379,528) | 65-74<br>(n=92,573) | 75-84<br>(n=40,481) | ≥85<br>(n=18,838) | McInnes Advisory Group<br>(n=250,329) | PANORAMIC<br>(n=691,593) | Green Book<br>(n=212,556) | IC<br>(n=63,547)                     | Non-IC<br>(n=1,629,716) |
| <b>Any COVID-19 medication use:</b> n (%)                             | 253<br>(<1.0%)       | 69<br>(<1.0%)          | 63<br>(<1.0%)        | 33<br>(<1.0%)       | 39<br>(0.1%)        | 49<br>(0.3%)      | 158<br>(0.1%)                         | 214<br>(<1.0%)           | 116 (0.1%)                | 51<br>(0.1%)                         | 202<br>(<1.0%)          |
| <b>Primary care consultations-F2F:</b> number with ≥ 1 visit (%)      | 71,039<br>(4.2%)     | 39,108 (3.4%)          | 19,330 (5.1%)        | 6,491 (7.0%)        | 3,726 (9.2%)        | 2,384 (12.7%)     | 16,989 (6.8%)                         | 40,991 (5.9%)            | 17,237<br>(8.1%)          | 4,587<br>(7.2%)                      | 66,452 (4.1%)           |
| <b>Primary care consultations-Telephone:</b> number with ≥ 1 call (%) | 137,148<br>(8.1%)    | 70,675 (6.1%)          | 40,311<br>(10.6%)    | 13,434<br>(14.5%)   | 7,860 (19.4%)       | 4,868 (25.8%)     | 35,935<br>(14.4%)                     | 86,002<br>(12.4%)        | 36,852<br>(17.3%)         | 9,375<br>(14.8%)                     | 127,773<br>(7.8%)       |

Among COVID cases managed in the community, none had record of receipt of nirmatrelvir/ritonavir, remdesivir, casirivimab/imdevimab or bari-citinib.

**IC: immunocompromised; Non-IC: non-immunocompromised also known as immunocompetent.**

## COVID-19 HCRU Adults manuscript – Supplementary materials

**Supplementary eTable 7:** Costs in the four weeks after index stratified by age, risk of severe COVID-19 and immunocompromised status at baseline among the primary care cohort

| Costs                                           | Age stratifications   |                         |                       |                      |                      |                   | Risk criteria                                  |                           |                            | Immunocompromised status at baseline |                         |
|-------------------------------------------------|-----------------------|-------------------------|-----------------------|----------------------|----------------------|-------------------|------------------------------------------------|---------------------------|----------------------------|--------------------------------------|-------------------------|
|                                                 | All<br>(n= 1,693,263) | 18-49<br>(n= 1,161,843) | 50-64<br>(n= 379,528) | 65-74<br>(n= 92,573) | 75-84<br>(n= 40,481) | ≥85<br>(n=18,838) | McInnes Ad-<br>visory<br>Group<br>(n= 250,329) | PANORAMIC<br>(n= 691,593) | Green Book<br>(n= 212,556) | IC<br>(n= 63,547)                    | Non-IC<br>(n=1,629,716) |
| <b>Medication cost (£)</b>                      |                       |                         |                       |                      |                      |                   |                                                |                           |                            |                                      |                         |
| Mean (SD)                                       | 165 (465)             | 242 (538)               | 204 (505)             | 134 (447)            | 187 (530)            | 8 (36)            | 206 (518)                                      | 159 (457)                 | 161 (448)                  | 486 (759)                            | 83 (307)                |
| Median (Q1, Q3)                                 | 2 (2, 4)              | 3 (2, 256)              | 2 (2, 24)             | 2 (2, 3)             | 3 (1, 10)            | 3 (1, 3)          | 3 (2, 21)                                      | 2 (2, 4)                  | 3 (2, 9)                   | 21 (3, 566)                          | 2 (2, 3)                |
| <b>Primary care consultations-F2F (£)</b>       |                       |                         |                       |                      |                      |                   |                                                |                           |                            |                                      |                         |
| Mean (SD)                                       | 27 (22)               | 26 (21)                 | 28 (22)               | 27 (24)              | 27 (25)              | 27 (24)           | 28 (24)                                        | 28 (23)                   | 28 (25)                    | 28 (25)                              | 27 (22)                 |
| Median (Q1, Q3)                                 | 39 (7, 39)            | 39 (7, 39)              | 39 (7, 39)            | 39 (7, 39)           | 39 (7, 39)           | 39 (7, 39)        | 39 (7, 39)                                     | 39 (7, 39)                | 39 (7, 39)                 | 39 (7, 39)                           | 39 (7, 397)             |
| <b>Primary care consultations-Telephone (£)</b> |                       |                         |                       |                      |                      |                   |                                                |                           |                            |                                      |                         |
| Mean (SD)                                       | 18 (10)               | 17 (9)                  | 18 (10)               | 18 (10)              | 19 (11)              | 20 (13)           | 18 (11)                                        | 18 (10)                   | 19 (11)                    | 18 (10)                              | 18 (9)                  |
| Median (Q1, Q3)                                 | 16 (16, 16)           | 16 (16, 16)             | 16 (16, 16)           | 16 (16, 16)          | 16 (16, 16)          | 16 (16, 16)       | 16 (16, 16)                                    | 16 (16, 16)               | 16 (16, 16)                | 16 (16, 16)                          | 16 (16, 16)             |

**IC: immunocompromised; Non-IC: non-immunocompromised also known as immunocompetent.**



STROBE Statement—Checklist of items that should be included in reports of *cohort studies*

|                              | Item No | Recommendation                                                                                                                                                                                                                                                                                                                                                                                                                                                     |
|------------------------------|---------|--------------------------------------------------------------------------------------------------------------------------------------------------------------------------------------------------------------------------------------------------------------------------------------------------------------------------------------------------------------------------------------------------------------------------------------------------------------------|
| <b>Title and abstract</b>    | 1       | (a) Indicate the study's design with a commonly used term in the title or the abstract<br><a href="#">PAGE 1</a><br>(b) Provide in the abstract an informative and balanced summary of what was done and what was found <a href="#">PAGE 2</a>                                                                                                                                                                                                                     |
| <b>Introduction</b>          |         |                                                                                                                                                                                                                                                                                                                                                                                                                                                                    |
| Background/rationale         | 2       | Explain the scientific background and rationale for the investigation being reported<br><a href="#">PAGE 3</a>                                                                                                                                                                                                                                                                                                                                                     |
| Objectives                   | 3       | State specific objectives, including any prespecified hypotheses <a href="#">PAGE 3</a>                                                                                                                                                                                                                                                                                                                                                                            |
| <b>Methods</b>               |         |                                                                                                                                                                                                                                                                                                                                                                                                                                                                    |
| Study design                 | 4       | Present key elements of study design early in the paper <a href="#">PAGE 4</a>                                                                                                                                                                                                                                                                                                                                                                                     |
| Setting                      | 5       | Describe the setting, locations, and relevant dates, including periods of recruitment, exposure, follow-up, and data collection <a href="#">PAGE 4</a>                                                                                                                                                                                                                                                                                                             |
| Participants                 | 6       | (a) Give the eligibility criteria, and the sources and methods of selection of participants. Describe methods of follow-up <a href="#">PAGE 4</a><br>(b) For matched studies, give matching criteria and number of exposed and unexposed<br>N/A                                                                                                                                                                                                                    |
| Variables                    | 7       | Clearly define all outcomes, exposures, predictors, potential confounders, and effect modifiers. Give diagnostic criteria, if applicable <a href="#">PAGE 4, 5, 6</a>                                                                                                                                                                                                                                                                                              |
| Data sources/<br>measurement | 8*      | For each variable of interest, give sources of data and details of methods of assessment (measurement). Describe comparability of assessment methods if there is more than one group <a href="#">PAGE 4</a>                                                                                                                                                                                                                                                        |
| Bias                         | 9       | Describe any efforts to address potential sources of bias <a href="#">PAGE 5</a>                                                                                                                                                                                                                                                                                                                                                                                   |
| Study size                   | 10      | Explain how the study size was arrived at <a href="#">PAGE 6</a>                                                                                                                                                                                                                                                                                                                                                                                                   |
| Quantitative variables       | 11      | Explain how quantitative variables were handled in the analyses. If applicable, describe which groupings were chosen and why <a href="#">PAGE 6</a>                                                                                                                                                                                                                                                                                                                |
| Statistical methods          | 12      | (a) Describe all statistical methods, including those used to control for confounding<br><a href="#">PAGE 6</a><br>(b) Describe any methods used to examine subgroups and interactions <a href="#">PAGE 6</a><br>(c) Explain how missing data were addressed N/A<br>(d) If applicable, explain how loss to follow-up was addressed N/A<br>(e) Describe any sensitivity analyses N/A                                                                                |
| <b>Results</b>               |         |                                                                                                                                                                                                                                                                                                                                                                                                                                                                    |
| Participants                 | 13*     | (a) Report numbers of individuals at each stage of study—eg numbers potentially eligible, examined for eligibility, confirmed eligible, included in the study, completing follow-up, and analysed <a href="#">PAGE 6</a><br>(b) Give reasons for non-participation at each stage N/A<br>(c) Consider use of a flow diagram <a href="#">Due to limited eligibility criteria and retrospective nature of study design, we have opted to keep information in text</a> |
| Descriptive data             | 14*     | (a) Give characteristics of study participants (eg demographic, clinical, social) and information on exposures and potential confounders <a href="#">PAGE 6, 7, 8, 9</a><br>(b) Indicate number of participants with missing data for each variable of interest <a href="#">PAGE 8, 9</a><br>(c) Summarise follow-up time (eg, average and total amount) N/A                                                                                                       |
| Outcome data                 | 15*     | Report numbers of outcome events or summary measures over time <a href="#">PAGE 10, 11, 12, 13, 14, 15</a>                                                                                                                                                                                                                                                                                                                                                         |

|    |                          |    |                                                                                                                                                                                                                                                      |
|----|--------------------------|----|------------------------------------------------------------------------------------------------------------------------------------------------------------------------------------------------------------------------------------------------------|
| 1  | Main results             | 16 | (a) Give unadjusted estimates and, if applicable, confounder-adjusted estimates and their precision (eg, 95% confidence interval). Make clear which confounders were adjusted for and why they were included <a href="#">PAGE 10, 11, 12, 14, 15</a> |
| 2  |                          |    |                                                                                                                                                                                                                                                      |
| 3  |                          |    |                                                                                                                                                                                                                                                      |
| 4  |                          |    |                                                                                                                                                                                                                                                      |
| 5  |                          |    | (b) Report category boundaries when continuous variables were categorized <a href="#">PAGE 8, 9</a>                                                                                                                                                  |
| 6  |                          |    |                                                                                                                                                                                                                                                      |
| 7  |                          |    | (c) If relevant, consider translating estimates of relative risk into absolute risk for a meaningful time period <a href="#">N/A</a>                                                                                                                 |
| 8  |                          |    |                                                                                                                                                                                                                                                      |
| 9  | Other analyses           | 17 | Report other analyses done—eg analyses of subgroups and interactions, and sensitivity analyses <a href="#">N/A</a>                                                                                                                                   |
| 10 |                          |    |                                                                                                                                                                                                                                                      |
| 11 | <b>Discussion</b>        |    |                                                                                                                                                                                                                                                      |
| 12 |                          |    |                                                                                                                                                                                                                                                      |
| 13 | Key results              | 18 | Summarise key results with reference to study objectives <a href="#">PAGE 16</a>                                                                                                                                                                     |
| 14 | Limitations              | 19 | Discuss limitations of the study, taking into account sources of potential bias or imprecision. Discuss both direction and magnitude of any potential bias <a href="#">PAGE 17</a>                                                                   |
| 15 |                          |    |                                                                                                                                                                                                                                                      |
| 16 | Interpretation           | 20 | Give a cautious overall interpretation of results considering objectives, limitations, multiplicity of analyses, results from similar studies, and other relevant evidence <a href="#">PAGE 16, 17</a>                                               |
| 17 |                          |    |                                                                                                                                                                                                                                                      |
| 18 |                          |    |                                                                                                                                                                                                                                                      |
| 19 |                          |    |                                                                                                                                                                                                                                                      |
| 20 | Generalisability         | 21 | Discuss the generalisability (external validity) of the study results <a href="#">PAGE 16, 17</a>                                                                                                                                                    |
| 21 |                          |    |                                                                                                                                                                                                                                                      |
| 22 | <b>Other information</b> |    |                                                                                                                                                                                                                                                      |
| 23 | Funding                  | 22 | Give the source of funding and the role of the funders for the present study and, if applicable, for the original study on which the present article is based <a href="#">PAGE 19</a>                                                                |
| 24 |                          |    |                                                                                                                                                                                                                                                      |
| 25 |                          |    |                                                                                                                                                                                                                                                      |

\*Give information separately for exposed and unexposed groups.

**Note:** An Explanation and Elaboration article discusses each checklist item and gives methodological background and published examples of transparent reporting. The STROBE checklist is best used in conjunction with this article (freely available on the Web sites of PLoS Medicine at <http://www.plosmedicine.org/>, Annals of Internal Medicine at <http://www.annals.org/>, and Epidemiology at <http://www.epidem.com/>). Information on the STROBE Initiative is available at <http://www.strobe-statement.org>.
