# Supplementary material for: Healthcare resource utilisation and costs of hospitalisation and primary care among adults with COVID-19 in England: a population-based cohort study
Source: PubMed Central journal article supplement — BMJ Open. 2023 Dec 28;13(12):e075495. doi: 10.1136/bmjopen-2023-075495 (PMC10759085; doi:10.1136/bmjopen-2023-075495), 2023-12-28
Supplement: bmjopen-2023-075495supp001.pdf [file bmjopen-2023-075495supp001.pdf]

## COVID-19 HCRU Adults manuscript – Supplementary materials

SUPPLEMENTARY MATERIALS: “Healthcare resource utilisation and costs of hospitalisation and primary care among adults in England: a population-based cohort study” (Yang, Andersen, Rai et al 2023)

## Supplementary eFigure 1 Study design schematic

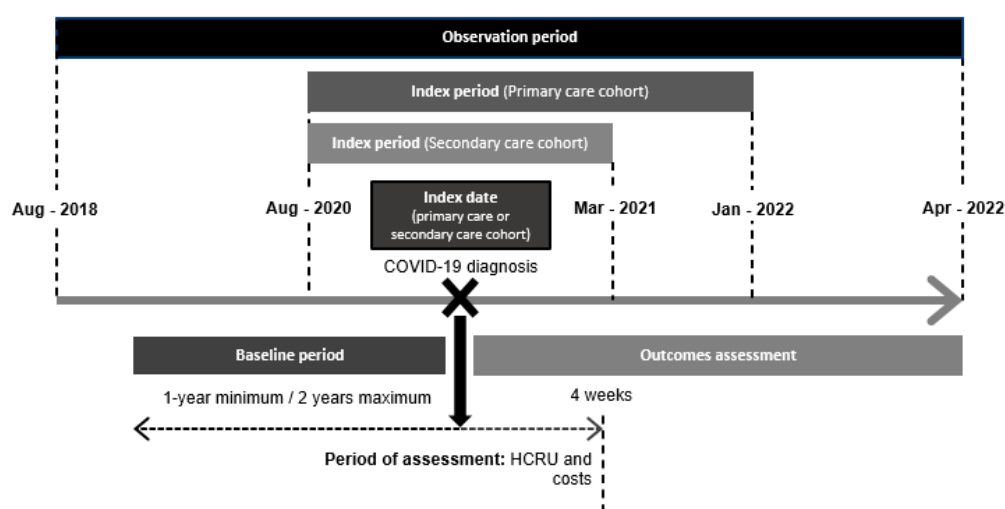

Note: When assessing disease severity, the highest level of severity experienced during the hospitalisation was reported.

## Supplementary eTable 1: COVID-19-related medications

| Generic name           |
|------------------------|
| Nirmatrelvir/ritonavir |
| Sotrovimab             |
| Molnupiravir           |
| Casirivimab/imdevimab  |
| Remdesivir             |
| Dexamethasone          |
| Tocilizumab            |
| Sarilumab              |
| Baricitinib            |

## COVID-19 HCRU Adults manuscript – Supplementary materials

**Supplementary eTable 2:** HCRU in the four weeks after index stratified by age, risk of severe COVID-19 and immunocompromised status at baseline among the hospitalised cohort

| HCRU                                     | All<br>(n=13,105)  | Age stratifications |                    |                    |                    |                    | Risk criteria                            |                         |                          | Immunocompromised status at baseline |                      |
|------------------------------------------|--------------------|---------------------|--------------------|--------------------|--------------------|--------------------|------------------------------------------|-------------------------|--------------------------|--------------------------------------|----------------------|
|                                          |                    | 18-49<br>(n=3,127)  | 50-64<br>(n=4,844) | 65-74<br>(n=2,386) | 75-84<br>(n=1,690) | ≥85<br>(n=1,058)   | McInnes Ad-<br>visory Group<br>(n=4,323) | PANORAMIC<br>(n=11,011) | Green Book<br>(n= 5,341) | IC<br>(n=181)                        | Non-IC<br>(n=12,924) |
| <b>Length of hospital stay (in days)</b> |                    |                     |                    |                    |                    |                    |                                          |                         |                          |                                      |                      |
| Mean (SD)                                | 9.2<br>(10.0)      | 6.4<br>(8.1)        | 9.0 (10.1)         | 10.8 (10.9)        | 11.2 (10.2)        | 11.4 (9.7)         | 9.9 (10.0)                               | 9.8 (10.2)              | 10.0<br>(9.8)            | 9.0<br>(6.7)                         | 9.2 (10.0)           |
| Median (Q1, Q3)                          | 6.0<br>(4.0, 11.0) | 5.0<br>(2.0, 7.0)   | 6.0<br>(4.0, 10.0) | 8.0<br>(5.0, 13.0) | 8.0<br>(5.0, 14.0) | 8.0<br>(5.0, 15.0) | 7.0<br>(4.0, 12.0)                       | 7.0<br>(4.0, 12.0)      | 7.0<br>(4.0, 12.0)       | 7.0<br>(4.5, 12.0)                   | 6.0<br>(4.0, 11.0)   |
| <b>Critical care admission</b>           |                    |                     |                    |                    |                    |                    |                                          |                         |                          |                                      |                      |
| n (%)                                    | 1,934 (14.8%)      | 399 (12.8%)         | 896 (18.5%)        | 456 (19.1%)        | 165 (9.8%)         | 18<br>(1.7%)       | 608 (14.1%)                              | 1,687 (15.3%)           | 695 (13.0%)              | 10 (5.5%)                            | 1,924 (14.9%)        |
| <b>Length of stay in critical care</b>   |                    |                     |                    |                    |                    |                    |                                          |                         |                          |                                      |                      |
| Mean (SD)                                | 11.5 (11.2)        | 9.7 (10.9)          | 12.3 (11.8)        | 12.3 (11.1)        | 10.0<br>(8.9)      | 5.3<br>(5.6)       | 11.4 (10.9)                              | 11.7 (11.1)             | 11.2 (10.6)              | 9.0<br>(5.8)                         | 11.5 (11.3)          |
| Median (Q1, Q3)                          | 8.0<br>(4.0, 15.0) | 6.0<br>(4.0, 11.0)  | 8.5<br>(5.0, 16.0) | 9.0<br>(5.0, 15.0) | 8.0<br>(4.0, 14.0) | 4.0<br>(1.0, 7.0)  | 8.0<br>(5.0, 15.0)                       | 8.0<br>(5.0, 15.0)      | 8.0<br>(5.0, 14.0)       | 8.5<br>(4.0, 13.0)                   | 8.0<br>(4.2, 15.0)   |
| <b>Mechanical ventilation</b>            |                    |                     |                    |                    |                    |                    |                                          |                         |                          |                                      |                      |
| n (%)                                    | 792<br>(6.0%)      | 135<br>(4.3%)       | 398<br>(8.2%)      | 204<br>(8.6%)      | 55<br>(3.3%)       | 0                  | 250<br>(5.8%)                            | 713<br>(6.5%)           | 278<br>(5.2%)            | <5                                   | 790<br>(6.1%)        |
| <b>Mechanical ventilation days</b>       |                    |                     |                    |                    |                    |                    |                                          |                         |                          |                                      |                      |
| Mean (SD)                                | 1.2<br>(0.5)       | 1.2<br>(0.4)        | 1.2<br>(0.4)       | 1.2<br>(0.5)       | 1.1<br>(0.4)       | 0                  | 1.2<br>(0.4)                             | 1.2<br>(0.5)            | 1.2<br>(0.4)             | N/A*                                 | 1.2<br>(0.5)         |
| Median (Q1, Q3)                          | 1.0<br>(1.0, 1.0)  | 1.0<br>(1.0, 1.0)   | 1.0<br>(1.0, 1.0)  | 1.0<br>(1.0, 1.0)  | 1.0<br>(1.0, 1.0)  | 0                  | 1.0<br>(1.0, 1.0)                        | 1.0<br>(1.0, 1.0)       | 1.0<br>(1.0, 1.0)        | N/A*                                 | 1.0<br>(1.0, 1.0)    |

In the event of multiple hospitalisations (or critical care stays) during the acute COVID-19 phase, the average per person, rather than the cumulative total, was used.

\*Suppressed to comply with the reporting rules.

**IC: immunocompromised; Non-IC: non-immunocompromised also known as immunocompetent.**

## COVID-19 HCRU Adults manuscript – Supplementary materials

**Supplementary eTable 3:** Costs in the four weeks after index stratified by age, risk of severe COVID-19 and immunocompromised status at baseline among the hospitalised cohort

| Costs                                                                        | Age stratifications           |                               |                               |                               |                               |                          | Risk criteria                        |                               |                            | Immunocompromised status at baseline |                               |
|------------------------------------------------------------------------------|-------------------------------|-------------------------------|-------------------------------|-------------------------------|-------------------------------|--------------------------|--------------------------------------|-------------------------------|----------------------------|--------------------------------------|-------------------------------|
|                                                                              | All<br>(n= 13,105)            | 18-49<br>(n= 3,127)           | 50-64<br>(n= 4,844)           | 65-74<br>(n= 2,386)           | 75-84<br>(n= 1,690)           | ≥85<br>(n=1,058)         | McInnes Advisory Group<br>(n= 4,323) | PANORAMIC<br>(n= 11,011)      | Green Book<br>(n= 5,341)   | IC<br>(n=181)                        | Non-IC<br>(n=12,924)          |
| <b>Healthcare cost per hospitalisation (£)</b>                               |                               |                               |                               |                               |                               |                          |                                      |                               |                            |                                      |                               |
| Mean (SD)                                                                    | 13,059<br>(18,659)            | 10,215<br>(16,242)            | 14,396<br>(21,874)            | 15,655<br>(20,965)            | 12,500<br>(12,409)            | 10,365<br>(6,773)        | 13,436 (17,582)                      | 13,693<br>(19,028)            | 13,009 (16,509)            | 10,814<br>(8,525)                    | 13,090<br>(18,761)            |
| Median (Q1, Q3)                                                              | 8,727 (4,364,<br>13,091)      | 7,703 (2,994,<br>11,600)      | 8,727 (4,364,<br>14,317)      | 8,727 (4,471,<br>17,399)      | 8,942 (5,800,<br>13,413)      | 8,835 (5,800,<br>13,091) | 8,727 (4,471,<br>14,450)             | 8,727 (4,364,<br>13,759)      | 8,727 (4,471,<br>13,413)   | 8,727 (5,800,<br>13,063)             | 8,727 (4,364,<br>13,091)      |
| <b>Healthcare cost of non-critical care admission (£)</b>                    |                               |                               |                               |                               |                               |                          |                                      |                               |                            |                                      |                               |
| Mean (SD)                                                                    | 9,360 (7,275)                 | 7,516 (6,294)                 | 9,199 (7,028)                 | 10,366 (7,990)                | 10,898 (7,787)                | 10,876<br>(7,308)        | 10,059 (7,634)                       | 9,761 (7,412)                 | 10,041 (7,536)             | 10,283<br>(6,511)                    | 9,347 (7,284)                 |
| Median (Q1, Q3)                                                              | 8,727 (4,364,<br>12,799)      | 5,800 (2,259,<br>8,942)       | 8,727 (4,364,<br>12,561)      | 8,727 (4,364,<br>13,091)      | 8,942 (5,800,<br>13,091)      | 8,942 (5,800,<br>13,413) | 8,727 (4,364,<br>13,091)             | 8,727 (4,364,<br>13,091)      | 8,727 (4,364,<br>13,091)   | 8,727 (5,800,<br>13,091)             | 8,727 (4,364,<br>12,764)      |
| <b>Healthcare cost of critical care admission (£)</b>                        |                               |                               |                               |                               |                               |                          |                                      |                               |                            |                                      |                               |
| Mean (SD)                                                                    | 30,352<br>(35,116)            | 26,321<br>(34,702)            | 32,617<br>(37,578)            | 32,784<br>(33,219)            | 23,463<br>(25,529)            | 8,501 (8,689)            | 29,441 (32,155)                      | 30,988<br>(34,876)            | 29,150 (31,633)            | 19,345<br>(15,827)                   | 30,409<br>(35,181)            |
| Median (Q1, Q3)                                                              | 17,439 (9,285,<br>39,663)     | 11,332<br>(7,555,<br>30,039)  | 19,569 (9,444,<br>42,351)     | 22,421 (9,444,<br>41,808)     | 16,999 (7,474,<br>31,356)     | 5,617 (1,482,<br>9,444)  | 18,887 (9,285,<br>38,768)            | 18,887 (9,444,<br>39,860)     | 18,887 (9,444,<br>38,468)  | 14,551<br>(7,555,<br>27,096)         | 17,439 (9,285,<br>39,663)     |
| <b>Healthcare cost of critical care requiring mechanical ventilation (£)</b> |                               |                               |                               |                               |                               |                          |                                      |                               |                            |                                      |                               |
| Mean (SD)                                                                    | 51,103<br>(42,055)            | 52,000<br>(43,415)            | 52,071<br>(44,628)            | 51,106<br>(37,077)            | 41,379<br>(36,238)            | -                        | 46,364 (38,594)                      | 50,686<br>(41,554)            | 48,677 (38,050)            | 39,029<br>(23,487)                   | 51,135<br>(42,098)            |
| Median (Q1, Q3)                                                              | 40,148<br>(23,517,<br>64,772) | 39,860<br>(19,930,<br>77,057) | 41,768<br>(24,912,<br>61,556) | 39,860<br>(23,517,<br>67,263) | 34,877<br>(18,291,<br>55,637) | -                        | 37,369 (20,904,<br>57,486)           | 39,860<br>(23,855,<br>62,712) | 38,981 (22,421,<br>61,200) | 39,029<br>(22,421,<br>55,637)        | 40,148<br>(23,517,<br>64,813) |

Blank cells (i.e. “-”) are due those aged ≥85 years not receiving mechanical ventilation.

**IC: immunocompromised; Non-IC: non-immunocompromised also known as immunocompetent.**

## COVID-19 HCRU Adults manuscript – Supplementary materials

**Supplementary eTable 4:** Primary care HCRU stratified by age, risk of severe COVID and immunocompromised status at baseline among the hospitalised cohort

| HCRU                                                            | All<br>(n=13,105) | Age stratifications |                    |                    |                    |                  | Risk criteria                            |                         |                             | Immunocompromised status at baseline |                      |
|-----------------------------------------------------------------|-------------------|---------------------|--------------------|--------------------|--------------------|------------------|------------------------------------------|-------------------------|-----------------------------|--------------------------------------|----------------------|
|                                                                 |                   | 18-49<br>(n=3,127)  | 50-64<br>(n=4,844) | 65-74<br>(n=2,386) | 75-84<br>(n=1,690) | ≥85<br>(n=1,058) | McInnes Ad-<br>visory Group<br>(n=4,323) | PANORAMIC<br>(n=11,011) | Green<br>Book<br>(n= 5,341) | IC<br>(n=181)                        | Non-IC<br>(n=12,924) |
| Any COVID-19 medication use: n, (%)                             | 29<br>(0.2%)      | 6 (0.2%)            | 9 (0.2%)           | 5 (0.2%)           | 5 (0.3%)           | <5               | 14<br>(0.3%)                             | 27<br>(0.3%)            | 15<br>(0.3%)                | <5                                   | 28<br>(0.2%)         |
| Primary care consultations- F2F: number with ≥ 1 visit (%)      | 2,489 (19.0%)     | 559 (17.9%)         | 921 (19.0%)        | 425 (17.8%)        | 354 (21.0%)        | 230 (21.7%)      | 900 (20.8%)                              | 2,124<br>(19.3%)        | 1,093<br>(20.5%)            | 31<br>(17.1%)                        | 2,458 (19.0%)        |
| Primary care consultations- Telephone: number with ≥ 1 call (%) | 5,077 (38.7%)     | 1,178<br>(37.7%)    | 1,840<br>(38.0%)   | 949 (39.8%)        | 701 (41.5%)        | 409 (38.7%)      | 1,815 (42.0%)                            | 4,341<br>(39.4%)        | 2,306<br>(43.2%)            | 87<br>(48.1%)                        | 4,990 (38.6%)        |

IC: immunocompromised; Non-IC: non-immunocompromised also known as immunocompetent.

## COVID-19 HCRU Adults manuscript – Supplementary materials

**Supplementary eTable 5:** Primary care costs stratified by age, risk of severe COVID and immunocompromised status at baseline among the hospitalised cohort

|                                                        | All<br>(n= 13,105)   | Age stratifications  |                      |                      |                      |                      | Risk criteria                             |                          |                          | Immunocompromised status<br>at baseline |                      |
|--------------------------------------------------------|----------------------|----------------------|----------------------|----------------------|----------------------|----------------------|-------------------------------------------|--------------------------|--------------------------|-----------------------------------------|----------------------|
|                                                        |                      | 18-49<br>(n= 3,127)  | 50-64<br>(n= 4,844)  | 65-74<br>(n= 2,386)  | 75-84<br>(n= 1,690)  | ≥85<br>(n=1,058)     | McInnes Advi-<br>sory Group<br>(n= 4,323) | PANORAMIC<br>(n= 11,011) | Green Book<br>(n= 5,341) | IC<br>(n=181)                           | Non-IC<br>(n=12,924) |
| <b>Medication cost (£)</b>                             |                      |                      |                      |                      |                      |                      |                                           |                          |                          |                                         |                      |
| Mean (SD)                                              | 4.8 (15.4)           | 1.8 (1.1)            | 1.9 (1.5)            | 2.6 (1.4)            | 2.2 (1.3)            | 22.2 (41.6)          | 8.2 (22.0)                                | 5.1 (15.9)               | 7.7 (21.3)               | 0.6 (-)                                 | 5.0 (15.7)           |
| Median<br>(Q1, Q3)                                     | 1.8 (1.2, 2.5)       | 1.5 (0.9, 2.5)       | 1.3 (1.2, 1.8)       | 1.8 (1.8, 2.5)       | 2.5 (1.3, 2.8)       | 1.9 (0.9,<br>43.6)   | 2.5 (1.3, 3.6)                            | 1.8 (1.2, 2.5)           | 2.5 (1.3, 3.6)           | 0.6 (0.6, 0.6)                          | 1.8 (1.2, 2.5)       |
| <b>Primary care consulta-<br/>tions- F2F (£)</b>       |                      |                      |                      |                      |                      |                      |                                           |                          |                          |                                         |                      |
| Mean (SD)                                              | 30.5 (26.5)          | 31.4 (30.3)          | 31.9 (24.7)          | 30.5 (26.3)          | 28.7 (28.1)          | 25.5 (20.1)          | 30.0 (24.6)                               | 30.4 (25.8)              | 30.0 (25.6)              | 35.6 (27.1)                             | 30.4 (26.5)          |
| Median<br>(Q1, Q3)                                     | 39.2<br>(6.8, 39.2)  | 13.5<br>(6.8, 39.2)  | 39.2<br>(6.8, 39.2)                       | 39.2<br>(6.8, 39.2)      | 39.2<br>(6.8, 39.2)      | 39.2<br>(13.5, 39.2)                    | 39.2<br>(6.8, 39.2)  |
| <b>Primary care consulta-<br/>tions- Telephone (£)</b> |                      |                      |                      |                      |                      |                      |                                           |                          |                          |                                         |                      |
| Mean (SD)                                              | 22.5 (13.8)          | 23.2 (14.7)          | 22.7 (13.6)          | 22.2 (14.0)          | 21.6 (13.1)          | 21.4 (12.5)          | 23.0 (14.2)                               | 22.4 (13.6)              | 22.8 (13.9)              | 23.0 (15.5)                             | 22.5 (13.8)          |
| Median<br>(Q1, Q3)                                     | 15.5<br>(15.5, 31.0)                      | 15.5<br>(15.5, 31.0)     | 15.5<br>(15.5, 31.0)     | 15.5<br>(15.5, 31.0)                    | 15.5<br>(15.5, 31.0) |

**IC: immunocompromised; Non-IC: non-immunocompromised also known as immunocompetent.**

## COVID-19 HCRU Adults manuscript – Supplementary materials

**Supplementary eTable 6:** HCRU in the four weeks after index stratified by age, risk of severe COVID-19 and immunocompromised status at baseline among the primary care cohort

| HCRU                                                                  | Age stratifications  |                        |                      |                     |                     |                   | Risk criteria                         |                          |                           | Immunocompromised status at baseline |                         |
|-----------------------------------------------------------------------|----------------------|------------------------|----------------------|---------------------|---------------------|-------------------|---------------------------------------|--------------------------|---------------------------|--------------------------------------|-------------------------|
|                                                                       | All<br>(n=1,693,263) | 18-49<br>(n=1,161,843) | 50-64<br>(n=379,528) | 65-74<br>(n=92,573) | 75-84<br>(n=40,481) | ≥85<br>(n=18,838) | McInnes Advisory Group<br>(n=250,329) | PANORAMIC<br>(n=691,593) | Green Book<br>(n=212,556) | IC<br>(n=63,547)                     | Non-IC<br>(n=1,629,716) |
| <b>Any COVID-19 medication use:</b> n (%)                             | 253<br>(<1.0%)       | 69<br>(<1.0%)          | 63<br>(<1.0%)        | 33<br>(<1.0%)       | 39<br>(0.1%)        | 49<br>(0.3%)      | 158<br>(0.1%)                         | 214<br>(<1.0%)           | 116 (0.1%)                | 51<br>(0.1%)                         | 202<br>(<1.0%)          |
| <b>Primary care consultations-F2F:</b> number with ≥ 1 visit (%)      | 71,039<br>(4.2%)     | 39,108 (3.4%)          | 19,330 (5.1%)        | 6,491 (7.0%)        | 3,726 (9.2%)        | 2,384 (12.7%)     | 16,989 (6.8%)                         | 40,991 (5.9%)            | 17,237 (8.1%)             | 4,587 (7.2%)                         | 66,452 (4.1%)           |
| <b>Primary care consultations-Telephone:</b> number with ≥ 1 call (%) | 137,148<br>(8.1%)    | 70,675 (6.1%)          | 40,311 (10.6%)       | 13,434 (14.5%)      | 7,860 (19.4%)       | 4,868 (25.8%)     | 35,935 (14.4%)                        | 86,002 (12.4%)           | 36,852 (17.3%)            | 9,375 (14.8%)                        | 127,773 (7.8%)          |

Among COVID cases managed in the community, none had record of receipt of nirmatrelvir/ritonavir, remdesivir, casirivimab/imdevimab or bari-citinib.

**IC: immunocompromised; Non-IC: non-immunocompromised also known as immunocompetent.**

## COVID-19 HCRU Adults manuscript – Supplementary materials

**Supplementary eTable 7:** Costs in the four weeks after index stratified by age, risk of severe COVID-19 and immunocompromised status at baseline among the primary care cohort

| Costs                                                    | Age stratifications   |                         |                       |                      |                      |                   | Risk criteria                                  |                           |                            | Immunocompromised status at baseline |                         |
|----------------------------------------------------------|-----------------------|-------------------------|-----------------------|----------------------|----------------------|-------------------|------------------------------------------------|---------------------------|----------------------------|--------------------------------------|-------------------------|
|                                                          | All<br>(n= 1,693,263) | 18-49<br>(n= 1,161,843) | 50-64<br>(n= 379,528) | 65-74<br>(n= 92,573) | 75-84<br>(n= 40,481) | ≥85<br>(n=18,838) | McInnes Ad-<br>visory<br>Group<br>(n= 250,329) | PANORAMIC<br>(n= 691,593) | Green Book<br>(n= 212,556) | IC<br>(n= 63,547)                    | Non-IC<br>(n=1,629,716) |
| <b>Medication<br/>cost (£)</b>                           |                       |                         |                       |                      |                      |                   |                                                |                           |                            |                                      |                         |
| Mean (SD)                                                | 165 (465)             | 242 (538)               | 204 (505)             | 134 (447)            | 187 (530)            | 8 (36)            | 206 (518)                                      | 159 (457)                 | 161 (448)                  | 486 (759)                            | 83 (307)                |
| Median (Q1,<br>Q3)                                       | 2 (2, 4)              | 3 (2, 256)              | 2 (2, 24)             | 2 (2, 3)             | 3 (1, 10)            | 3 (1, 3)          | 3 (2, 21)                                      | 2 (2, 4)                  | 3 (2, 9)                   | 21 (3, 566)                          | 2 (2, 3)                |
| <b>Primary care<br/>consultations-<br/>F2F (£)</b>       |                       |                         |                       |                      |                      |                   |                                                |                           |                            |                                      |                         |
| Mean (SD)                                                | 27 (22)               | 26 (21)                 | 28 (22)               | 27 (24)              | 27 (25)              | 27 (24)           | 28<br>(24)                                     | 28 (23)                   | 28<br>(25)                 | 28 (25)                              | 27 (22)                 |
| Median (Q1,<br>Q3)                                       | 39 (7, 39)            | 39 (7, 39)              | 39 (7, 39)            | 39 (7, 39)           | 39 (7, 39)           | 39 (7, 39)        | 39 (7, 39)                                     | 39 (7, 39)                | 39 (7, 39)                 | 39 (7, 39)                           | 39 (7, 397)             |
| <b>Primary care<br/>consultations-<br/>Telephone (£)</b> |                       |                         |                       |                      |                      |                   |                                                |                           |                            |                                      |                         |
| Mean (SD)                                                | 18 (10)               | 17 (9)                  | 18 (10)               | 18 (10)              | 19 (11)              | 20 (13)           | 18 (11)                                        | 18 (10)                   | 19 (11)                    | 18 (10)                              | 18 (9)                  |
| Median (Q1,<br>Q3)                                       | 16<br>(16, 16)        | 16 (16, 16)             | 16 (16, 16)           | 16 (16, 16)          | 16 (16, 16)          | 16 (16, 16)       | 16 (16, 16)                                    | 16 (16, 16)               | 16 (16, 16)                | 16 (16, 16)                          | 16 (16, 16)             |

**IC: immunocompromised; Non-IC: non-immunocompromised also known as immunocompetent.**
